# Supplementary material for: Proteome of Stored RBC Membrane and Vesicles from Heterozygous Beta Thalassemia Donors
Source: MDPI journal article supplement (doi:10.3390/ijms22073369), 2021-03-25
Supplement: s1 [file s1]

**Table S4:** Major RBC components of storage EVs and their relation to membrane values

| Protein                           | EVs (A.U.)                |           | p-value<br>( $\beta$ Thal <sup>+</sup> vs. C) | EV/membrane ratio*        |              |
|-----------------------------------|---------------------------|-----------|-----------------------------------------------|---------------------------|--------------|
|                                   | $\beta$ Thal <sup>+</sup> | Control   |                                               | $\beta$ Thal <sup>+</sup> | Control      |
| <b>Hb alpha chains</b>            | 1,187±159                 | 1,125±137 | 0.526                                         | <b>6.630</b>              | <b>6.125</b> |
| <b>Hb beta chains</b>             | 975±56                    | 978±114   | 0.965                                         | <b>9.559</b>              | <b>8.969</b> |
| Stomatin                          | 354±145                   | 340±93    | 0.858                                         | 0.930                     | 0.956        |
| Band 3                            | 297±134                   | 245±51    | 0.448                                         | 0.254                     | 0.212        |
| Ankyrin                           | 237±29                    | 216±21    | 0.228                                         | 0.091                     | 0.090        |
| <b>Valosin containing protein</b> | 189±18                    | 188±11    | 0.853                                         | <b>1.333</b>              | <b>1.460</b> |
| <b>Carbonic anhydrase-1</b>       | 193±63                    | 137±23    | 0.100                                         | <b>9.482</b>              | <b>9.935</b> |
| Peroxiredoxin-2                   | 160±72                    | 128±49    | 0.432                                         | 0.965                     | 0.889        |
| <b>Catalase</b>                   | 118±20                    | 105±31    | 0.467                                         | <b>1.723</b>              | <b>1.625</b> |
| Protein 4.1R                      | 86±35                     | 79±11     | 0.685                                         | 0.096                     | 0.090        |
| <b>Flavin reductase</b>           | 105±26                    | 78±10     | 0.030                                         | <b>3.488</b>              | <b>2.630</b> |

(\*) day 42 of storage. Bold: ratio > 1.25
