# Supplementary material for: Proteome of Stored RBC Membrane and Vesicles from Heterozygous Beta Thalassemia Donors
Source: MDPI journal article supplement (doi:10.3390/ijms22073369), 2021-03-25
Supplement: s1 [file s1]

|    |                                                                                                               |                       |              |                  | Total Spectrum Count           |        |        |        |        |        |         |        |        |        |        |        |
|----|---------------------------------------------------------------------------------------------------------------|-----------------------|--------------|------------------|--------------------------------|--------|--------|--------|--------|--------|---------|--------|--------|--------|--------|--------|
| #  | Identified Proteins (833)                                                                                     | Accession Number      | Alternate ID | Molecular Weight | beta-Thalassemia Heterozygotes |        |        |        |        |        | Control |        |        |        |        |        |
|    |                                                                                                               |                       |              |                  | Day 7                          | Day 14 | Day 21 | Day 28 | Day 35 | Day 42 | Day 7   | Day 14 | Day 21 | Day 28 | Day 35 | Day 42 |
| 1  | Spectrin alpha chain, erythrocytic 1 OS=Homo sapiens OX=9606 GN=SPTA1 PE=1 SV=5                               | SPTA1_HUMAN           | SPTA1        | 280 kDa          | 3785                           | 3377   | 3620   | 3731   | 3625   | 3245   | 3102    | 3293   | 3387   | 3424   | 3157   | 3446   |
| 2  | Spectrin beta chain, erythrocytic OS=Homo sapiens OX=9606 GN=SPTB PE=1 SV=5                                   | SPTB1_HUMAN           | SPTB         | 246 kDa          | 3600                           | 3165   | 3312   | 3457   | 3307   | 3147   | 2780    | 2932   | 3104   | 3138   | 2957   | 3244   |
| 3  | Ankyrin-1 OS=Homo sapiens OX=9606 GN=ANK1 PE=1 SV=3                                                           | ANK1_HUMAN            | ANK1         | 206 kDa          | 2719                           | 2527   | 2587   | 2682   | 2613   | 2416   | 2270    | 2351   | 2465   | 2481   | 2348   | 2540   |
| 4  | Band 3 anion transport protein OS=Homo sapiens OX=9606 GN=SLCA1 PE=1 SV=3                                     | B3AT_HUMAN            | SLCA1        | 102 kDa          | 1167                           | 1047   | 1112   | 1158   | 1119   | 1072   | 1013    | 1016   | 1075   | 1071   | 1034   | 1076   |
| 5  | Glyceraldehyde-3-phosphate dehydrogenase OS=Homo sapiens OX=9606 GN=GAPDH PE=1 SV=3                           | G3P_HUMAN             | GAPDH        | 36 kDa           | 1139                           | 1104   | 1120   | 1169   | 1124   | 1048   | 945     | 996    | 992    | 1022   | 973    | 1050   |
| 6  | Protein L1 OS=Homo sapiens OX=9606 GN=EPB41 PE=1 SV=4                                                         | L1_HUMAN              | EPB41        | 97 kDa           | 971                            | 904    | 964    | 953    | 951    | 912    | 845     | 897    | 912    | 863    | 859    | 920    |
| 7  | Erythrocyte membrane protein band 4.2 OS=Homo sapiens OX=9606 GN=EPB42 PE=1 SV=3                              | EPB42_HUMAN           | EPB42        | 77 kDa           | 899                            | 751    | 779    | 851    | 774    | 822    | 612     | 683    | 726    | 752    | 666    | 786    |
| 8  | Actin, cytoplasmic 1 OS=Homo sapiens OX=9606 GN=ACTB PE=1 SV=1                                                | ACTB_HUMAN            | ACTB         | 42 kDa           | 638                            | 657    | 642    | 670    | 656    | 611    | 615     | 618    | 646    | 654    | 666    | 650    |
| 9  | Erythrocyte band 7 integral membrane protein OS=Homo sapiens OX=9606 GN=STOM PE=1 SV=3                        | STOM_HUMAN            | STOM         | 32 kDa           | 411                            | 386    | 427    | 418    | 395    | 389    | 408     | 414    | 400    | 418    | 403    | 400    |
| 10 | Beta-adducin OS=Homo sapiens OX=9606 GN=ADD2 PE=1 SV=3                                                        | ADD8_HUMAN            | ADD2         | 81 kDa           | 413                            | 407    | 414    | 402    | 425    | 348    | 368     | 395    | 392    | 377    | 383    | 378    |
| 11 | Blood group Rh(CE) polypeptide OS=Homo sapiens OX=9606 GN=RHCE PE=1 SV=2                                      | RHCE_HUMAN            | RHCE         | 46 kDa           | 323                            | 327    | 323    | 350    | 324    | 308    | 294     | 308    | 318    | 318    | 318    | 318    |
| 12 | Fructose-bisphosphate aldolase A OS=Homo sapiens OX=9606 GN=ALDOA PE=1 SV=2                                   | ALDOA_HUMAN           | ALDOA        | 39 kDa           | 292                            | 275    | 330    | 345    | 315    | 337    | 223     | 242    | 275    | 277    | 250    | 283    |
| 13 | Flotillin-2 OS=Homo sapiens OX=9606 GN=FLT2 PE=1 SV=2                                                         | FLT2T_HUMAN           | FLT2T        | 47 kDa           | 336                            | 311    | 319    | 322    | 335    | 300    | 278     | 291    | 310    | 300    | 282    | 323    |
| 14 | Flotillin-1 OS=Homo sapiens OX=9606 GN=FLT1 PE=1 SV=3                                                         | FLT1T_HUMAN           | FLT1T        | 47 kDa           | 264                            | 251    | 243    | 249    | 262    | 243    | 236     | 237    | 249    | 241    | 230    | 256    |
| 15 | Alpha-adducin OS=Homo sapiens OX=9606 GN=ADD1 PE=1 SV=2                                                       | ADD4_HUMAN            | ADD1         | 81 kDa           | 255                            | 224    | 252    | 252    | 239    | 201    | 214     | 231    | 217    | 231    | 214    | 212    |
| 16 | Hemoglobin subunit alpha OS=Homo sapiens OX=9606 GN=HBA1 PE=1 SV=2                                            | HBA_HUMAN             | HBA1         | 15 kDa           | 223                            | 234    | 198    | 158    | 177    | 201    | 266     | 273    | 273    | 239    | 171    | 219    |
| 17 | Clathrin heavy chain 1 OS=Homo sapiens OX=9606 GN=CLTC PE=1 SV=5                                              | CLH1_HUMAN            | CLTC         | 192 kDa          | 185                            | 230    | 242    | 220    | 255    | 251    | 161     | 218    | 203    | 224    | 226    | 237    |
| 18 | Myosin-9 OS=Homo sapiens OX=9606 GN=MYH9 PE=1 SV=4                                                            | MYH9_HUMAN            | MYH9         | 227 kDa          | 199                            | 267    | 239    | 277    | 297    | 230    | 114     | 139    | 135    | 142    | 136    | 144    |
| 19 | 55 kDa erythrocyte membrane protein OS=Homo sapiens OX=9606 GN=MPP1 PE=1 SV=2                                 | EM55_HUMAN            | MPP1         | 52 kDa           | 220                            | 182    | 205    | 209    | 197    | 192    | 187     | 189    | 201    | 203    | 193    | 198    |
| 20 | Peroxiredoxin-2 OS=Homo sapiens OX=9606 GN=PRDX2 PE=1 SV=5                                                    | PRDX2_HUMAN           | PRDX2        | 22 kDa           | 214                            | 219    | 196    | 184    | 264    | 216    | 197     | 220    | 178    | 169    | 179    | 193    |
| 21 | Protein argonate-2 OS=Homo sapiens OX=9606 GN=AGO2 PE=1 SV=3                                                  | AGO2_HUMAN            | AGO2         | 97 kDa           | 209                            | 186    | 195    | 182    | 200    | 174    | 178     | 177    | 173    | 184    | 162    | 180    |
| 22 | E3 ubiquitin-protein ligase UBR4 OS=Homo sapiens OX=9606 GN=UBR4 PE=1 SV=1                                    | UBR4_HUMAN            | UBR4         | 574 kDa          | 101                            | 159    | 147    | 147    | 172    | 177    | 135     | 207    | 140    | 180    | 197    | 191    |
| 23 | Dematin OS=Homo sapiens OX=9606 GN=DMTN PE=1 SV=3                                                             | DEMA_HUMAN            | DMTN         | 46 kDa           | 156                            | 139    | 166    | 159    | 158    | 136    | 168     | 164    | 154    | 161    | 172    | 158    |
| 24 | ATP-citrate synthase OS=Homo sapiens OX=9606 GN=ACLY PE=1 SV=3                                                | ACLY_HUMAN            | ACLY         | 121 kDa          | 96                             | 124    | 166    | 166    | 160    | 159    | 91      | 117    | 117    | 130    | 133    | 150    |
| 25 | Solute carrier family 2, facilitated glucose transporter member 1 OS=Homo sapiens OX=9606 GN=SLC2A1 PE=1 SV=2 | GTR1_HUMAN            | SLC2A1       | 54 kDa           | 160                            | 126    | 153    | 160    | 152    | 151    | 135     | 153    | 138    | 154    | 125    | 158    |
| 26 | Transitional endoplasmic reticulum ATPase OS=Homo sapiens OX=9606 GN=VCP PE=1 SV=4                            | TERA_HUMAN            | VCP          | 89 kDa           | 103                            | 138    | 117    | 122    | 124    | 111    | 141     | 159    | 127    | 119    | 145    | 114    |
| 27 | Plasma membrane calcium-transporting ATPase 4 OS=Homo sapiens OX=9606 GN=ATP2B4 PE=1 SV=2                     | AT2B4_HUMAN           | ATP2B4       | 138 kDa          | 115                            | 114    | 110    | 116    | 117    | 114    | 123     | 131    | 123    | 130    | 125    | 121    |
| 28 | Glycophorin-C OS=Homo sapiens OX=9606 GN=GYPC PE=1 SV=1                                                       | GLPC_HUMAN            | GYPC         | 14 kDa           | 184                            | 146    | 152    | 148    | 149    | 131    | 117     | 133    | 140    | 149    | 122    | 142    |
| 29 | Kell blood group glycoprotein OS=Homo sapiens OX=9606 GN=KEL PE=1 SV=2                                        | KEL_HUMAN             | KEL          | 83 kDa           | 107                            | 102    | 92     | 94     | 92     | 109    | 102     | 105    | 115    | 115    | 115    | 121    |
| 30 | Tropomodulin-1 OS=Homo sapiens OX=9606 GN=TMOD1 PE=1 SV=1                                                     | TMOD1_HUMAN           | TMOD1        | 41 kDa           | 116                            | 110    | 125    | 118    | 112    | 118    | 117     | 101    | 102    | 117    | 115    | 117    |
| 31 | Hemoglobin subunit beta OS=Homo sapiens OX=9606 GN=HBB PE=1 SV=2                                              | HBB_HUMAN             | HBB          | 16 kDa           | 97                             | 100    | 105    | 89     | 92     | 103    | 123     | 116    | 139    | 107    | 98     | 98     |
| 32 | AP-2 complex subunit beta OS=Homo sapiens OX=9606 GN=AP2B1 PE=1 SV=1                                          | AP2B1_HUMAN           | AP2B1        | 105 kDa          | 90                             | 109    | 111    | 103    | 105    | 108    | 71      | 84     | 86     | 89     | 87     | 79     |
| 33 | Immunoglobulin gamma-1 heavy chain OS=Homo sapiens OX=9606 PE=1 SV=2                                          | IGG1_HUMAN            | IGG1         | 49 kDa           | 93                             | 95     | 72     | 97     | 95     | 86     | 90      | 89     | 88     | 88     | 97     | 87     |
| 34 | Heat shock cognate 71 kDa protein OS=Homo sapiens OX=9606 GN=HSPA8 PE=1 SV=1                                  | HSP7C_HUMAN           | HSPA8        | 71 kDa           | 67                             | 96     | 102    | 89     | 120    | 99     | 71      | 88     | 83     | 83     | 91     | 84     |
| 35 | AP-2 complex subunit alpha-1 OS=Homo sapiens OX=9606 GN=AP2A1 PE=1 SV=3                                       | AP2A1_HUMAN           | AP2A1        | 108 kDa          | 76                             | 95     | 93     | 90     | 87     | 86     | 63      | 64     | 69     | 74     | 73     | 80     |
| 36 | Catalase OS=Homo sapiens OX=9606 GN=CAT PE=1 SV=3                                                             | CAT4_HUMAN            | CAT          | 60 kDa           | 76                             | 77     | 67     | 66     | 94     | 77     | 94      | 84     | 74     | 58     | 78     | 66     |
| 37 | ATP-binding cassette sub-family B member 6, mitochondrial OS=Homo sapiens OX=9606 GN=ABCB6 PE=1 SV=1          | ABCB6_HUMAN           | ABCB6        | 94 kDa           | 80                             | 86     | 73     | 88     | 78     | 73     | 93      | 95     | 86     | 92     | 90     | 95     |
| 38 | Myosin-10 OS=Homo sapiens OX=9606 GN=MYH10 PE=1 SV=3                                                          | MYH10_HUMAN           | MYH10        | 229 kDa          | 139                            | 178    | 166    | 195    | 198    | 163    | 34      | 36     | 39     | 50     | 44     | 47     |
| 39 | Erythroid membrane-associated protein OS=Homo sapiens OX=9606 GN=ERMAP PE=1 SV=1                              | ERMAP_HUMAN           | ERMAP        | 53 kDa           | 81                             | 68     | 80     | 90     | 88     | 78     | 59      | 64     | 71     | 59     | 65     | 73     |
| 40 | 26S proteasome non-ATPase regulatory subunit 2 OS=Homo sapiens OX=9606 GN=PSMD2 PE=1 SV=3                     | PSMD2_HUMAN           | PSMD2        | 100 kDa          | 85                             | 92     | 88     | 93     | 97     | 91     | 73      | 82     | 59     | 71     | 80     | 71     |
| 41 | Heat shock protein HSP 90-alpha OS=Homo sapiens OX=9606 GN=HSP90AA1 PE=1 SV=5                                 | HS90A_HUMAN           | HSP90AA1     | 85 kDa           | 76                             | 97     | 87     | 72     | 115    | 97     | 54      | 64     | 52     | 50     | 61     | 45     |
| 42 | Piezo-type mechanosensitive ion channel component 1 OS=Homo sapiens OX=9606 GN=PIEZO1 PE=1 SV=4               | PIE2_HUMAN            | PIEZO1       | 287 kDa          | 60                             | 58     | 70     | 66     | 61     | 68     | 81      | 78     | 75     | 72     | 75     | 81     |
| 43 | Ras-related protein Rap-1A OS=Homo sapiens OX=9606 GN=RAP1A PE=1 SV=1                                         | RAP1A_HUMAN           | RAP1A        | 21 kDa           | 118                            | 78     | 79     | 86     | 68     | 58     | 62      | 59     | 65     | 54     | 56     | 51     |
| 44 | Aquaporin-1 OS=Homo sapiens OX=9606 GN=AQP1 PE=1 SV=3                                                         | AQP1_HUMAN            | AQP1         | 29 kDa           | 87                             | 67     | 67     | 60     | 88     | 71     | 77      | 79     | 72     | 93     | 75     | 94     |
| 45 | Multidrug resistance-associated protein 4 OS=Homo sapiens OX=9606 GN=ABCC4 PE=1 SV=3                          | MARP4_HUMAN           | ABCC4        | 150 kDa          | 60                             | 61     | 66     | 66     | 57     | 60     | 74      | 73     | 67     | 78     | 66     | 73     |
| 46 | T-complex protein 1 subunit eta OS=Homo sapiens OX=9606 GN=CCT7 PE=1 SV=2                                     | TCPE_HUMAN            | CCT7         | 59 kDa           | 60                             | 74     | 71     | 81     | 87     | 81     | 52      | 67     | 54     | 56     | 53     | 60     |
| 47 | Arginase-1 OS=Homo sapiens OX=9606 GN=ARG1 PE=1 SV=2                                                          | ARG1_HUMAN            | ARG1         | 35 kDa           | 79                             | 81     | 70     | 80     | 67     | 80     | 50      | 53     | 59     | 55     | 50     | 51     |
| 48 | Acylamino-acid-releasing enzyme OS=Homo sapiens OX=9606 GN=APEH PE=1 SV=4                                     | ACP1_HUMAN            | APEH         | 81 kDa           | 49                             | 53     | 63     | 50     | 80     | 53     | 73      | 77     | 54     | 46     | 63     | 51     |
| 49 | T-complex protein 1 subunit zeta OS=Homo sapiens OX=9606 GN=CTGA PE=1 SV=3                                    | TCPE2_HUMAN           | CTGA         | 58 kDa           | 52                             | 53     | 66     | 71     | 79     | 70     | 41      | 53     | 41     | 49     | 51     | 62     |
| 50 | Cullin-associated NEDD8-dissociated protein 1 OS=Homo sapiens OX=9606 GN=CAND1 PE=1 SV=2                      | CAND1_HUMAN           | CAND1        | 136 kDa          | 54                             | 62     | 54     | 62     | 48     | 62     | 46      | 54     | 50     | 42     | 57     | 62     |
| 51 | T-complex protein 1 subunit alpha OS=Homo sapiens OX=9606 GN=TCP1 PE=1 SV=1                                   | TCPE1_HUMAN           | TCPE1        | 60 kDa           | 58                             | 64     | 57     | 65     | 81     | 84     | 39      | 54     | 42     | 41     | 50     | 58     |
| 52 | Serum albumin OS=Homo sapiens OX=9606 GN=ALB PE=1 SV=2                                                        | ALB_HUMAN             | ALB          | 69 kDa           | 55                             | 59     | 67     | 51     | 61     | 52     | 71      | 58     | 48     | 52     | 55     | 43     |
| 53 | Keratin, type I cytoskeletal 10 OS=Homo sapiens OX=9606 GN=KRT10 PE=1 SV=6                                    | K10_HUMAN             | KRT10        | 59 kDa           | 44                             | 80     | 64     | 55     | 45     | 54     | 76      | 76     | 59     | 58     | 49     | 46     |
| 54 | E2 ubiquitin-conjugating enzyme OS=Homo sapiens OX=9606 GN=UBE2O PE=1 SV=3                                    | sp Q9DC09 UBE2O_HUMAN | UBE2O        | 141 kDa          | 46                             | 65     | 52     | 69     | 75     | 67     | 43      | 59     | 50     | 53     | 61     | 60     |
| 55 | Delta-aminolevulinic acid dehydratase OS=Homo sapiens OX=9606 GN=ALAD PE=1 SV=1                               | HEM2_HUMAN            | ALAD         | 36 kDa           | 48                             | 55     | 54     | 48     | 64     | 57     | 53      | 58     | 43     | 46     | 61     | 52     |
| 56 | Long-chain-fatty-acid-CoA ligase 4 OS=Homo sapiens OX=9606 GN=ACSL4 PE=1 SV=2                                 | ACSL4_HUMAN           | ACSL4        | 79 kDa           | 50                             | 53     | 53     | 60     | 61     | 54     | 63      | 52     | 57     | 50     | 57     | 54     |
| 57 | Basal cell adhesion molecule OS=Homo sapiens OX=9606 GN=BCAM PE=1 SV=2                                        | BCAM_HUMAN            | BCAM         | 67 kDa           | 62                             | 61     | 62     | 54     | 69     | 55     | 58      | 53     | 55     | 62     | 59     | 63     |
| 58 | Endonuclease domain-containing 1 protein OS=Homo sapiens OX=9606 GN=ENDOD1 PE=1 SV=2                          | ENDD1_HUMAN           | ENDOD1       | 55 kDa           | 48                             | 50     | 58     | 50     | 56     | 54     | 54      | 51     | 49     | 46     | 47     | 53     |
| 59 | Proteasome subunit beta type-4 OS=Homo sapiens OX=9606 GN=PSMB4 PE=1 SV=4                                     | PSB4_HUMAN            | PSMB4        | 29 kDa           | 66                             | 71     | 71     | 75     | 79     | 62     | 59      | 62     | 59     | 62     | 63     | 66     |
| 60 | Guanine nucleotide-binding protein G(i)/G(s)/G(t) subunit beta-1 OS=Homo sapiens OX=96060                     |                       |              |                  |                                |        |        |        |        |        |         |        |        |        |        |        |



|     |                                                                      |                                              |               |         |         |    |    |    |    |    |    |    |    |    |    |    |    |
|-----|----------------------------------------------------------------------|----------------------------------------------|---------------|---------|---------|----|----|----|----|----|----|----|----|----|----|----|----|
| 89  | T-complex protein 1 subunit beta                                     | OS=Homo sapiens OX=9066 GN=CC22 PE=1 SV=4    | TCPB_HUMAN    | CCT2    | 57 kDa  | 48 | 44 | 44 | 46 | 52 | 59 | 39 | 51 | 28 | 25 | 30 | 29 |
| 90  | UDP-glucose-glycoprotein glucosyltransferase 1                       | OS=Homo sapiens OX=9066 GN=UGGT1 PE=1 SV=3   | UGGT1_HUMAN   | UGGT1   | 177 kDa | 29 | 30 | 29 | 26 | 25 | 31 | 51 | 54 | 54 | 49 | 57 | 61 |
| 91  | Keratin, type I cytoskeletal 9                                       | OS=Homo sapiens OX=9066 GN=KRT9 PE=1 SV=3    | KI09_HUMAN    | KRT9    | 62 kDa  | 30 | 55 | 36 | 24 | 41 | 33 | 60 | 62 | 35 | 50 | 33 | 29 |
| 92  | T-complex protein 1 subunit theta                                    | OS=Homo sapiens OX=9066 GN=CC78 PE=1 SV=4    | TCPO_HUMAN    | CCT8    | 60 kDa  | 39 | 45 | 42 | 39 | 44 | 45 | 30 | 47 | 33 | 36 | 37 | 35 |
| 93  | Acetylcholinesterase                                                 | OS=Homo sapiens OX=9066 GN=ACHE PE=1 SV=1    | ACSE_HUMAN    | ACHE    | 68 kDa  | 32 | 28 | 35 | 36 | 29 | 34 | 34 | 27 | 37 | 38 | 34 | 34 |
| 94  | Proteasome subunit alpha type-7                                      | OS=Homo sapiens OX=9066 GN=PSMA7 PE=1 SV=1   | PSA7_HUMAN    | PSMA7   | 28 kDa  | 32 | 47 | 35 | 41 | 56 | 37 | 38 | 53 | 37 | 41 | 31 | 33 |
| 95  | Proteasome subunit beta type-1                                       | OS=Homo sapiens OX=9066 GN=PSMB1 PE=1 SV=2   | PSB1_HUMAN    | PSMB1   | 26 kDa  | 32 | 42 | 39 | 43 | 41 | 38 | 36 | 43 | 37 | 38 | 39 | 38 |
| 96  | Guanine nucleotide-binding protein G(i) subunit alpha isoforms short | OS=Homo sapiens OX=9066 GN=GNAS1 PE=1 SV=1   | GNAS_HUMAN    | GNAS    | 46 kDa  | 53 | 43 | 50 | 48 | 45 | 43 | 43 | 40 | 41 | 45 | 39 | 43 |
| 97  | Proteasome activator complex subunit 2                               | OS=Homo sapiens OX=9066 GN=PSME2 PE=1 SV=4   | PSME2_HUMAN   | PSME2   | 27 kDa  | 38 | 43 | 39 | 41 | 50 | 49 | 38 | 41 | 42 | 43 | 37 | 43 |
| 98  | Polypyrimidine tract-binding protein 1                               | OS=Homo sapiens OX=9066 GN=PTBP1 PE=1 SV=1   | PTBP1_HUMAN   | PTBP1   | 57 kDa  | 37 | 35 | 39 | 38 | 36 | 43 | 42 | 35 | 39 | 40 | 43 | 32 |
| 99  | Long-chain-fatty-acid-CoA ligase 6                                   | OS=Homo sapiens OX=9066 GN=ACSL6 PE=2 SV=4   | ACSL6_HUMAN   | ACSL6   | 78 kDa  | 29 | 36 | 33 | 33 | 37 | 36 | 39 | 39 | 39 | 35 | 43 | 46 |
| 100 | Proteasome subunit beta type-5                                       | OS=Homo sapiens OX=9066 GN=PSMB5 PE=1 SV=3   | PSMB5_HUMAN   | PSMB5   | 28 kDa  | 36 | 47 | 45 | 46 | 38 | 39 | 46 | 49 | 32 | 37 | 43 | 43 |
| 101 | Stress-induced-phosphoprotein 1                                      | OS=Homo sapiens OX=9066 GN=STIP1 PE=1 SV=1   | STIP1_HUMAN   | STIP1   | 63 kDa  | 27 | 31 | 34 | 37 | 49 | 48 | 25 | 36 | 27 | 24 | 35 | 22 |
| 102 | Neurotrophin target esterase                                         | OS=Homo sapiens OX=9066 GN=PNPLA6 PE=1 SV=3  | PNPLA6_HUMAN  | PNPLA6  | 151 kDa | 40 | 29 | 32 | 27 | 35 | 36 | 46 | 34 | 37 | 45 | 36 | 47 |
| 103 | Multidrug resistance-associated protein 1                            | OS=Homo sapiens OX=9066 GN=ABCC1 PE=1 SV=3   | MRP1_HUMAN    | ABCC1   | 172 kDa | 28 | 30 | 38 | 36 | 30 | 31 | 38 | 29 | 39 | 32 | 36 | 33 |
| 104 | 26S proteasome regulatory subunit 6A                                 | OS=Homo sapiens OX=9066 GN=PSMC3 PE=1 SV=3   | PRSGA_HUMAN   | PSMC3   | 49 kDa  | 29 | 40 | 35 | 48 | 39 | 39 | 25 | 39 | 24 | 36 | 35 | 27 |
| 105 | Proteasome subunit beta type-6                                       | OS=Homo sapiens OX=9066 GN=PSMB6 PE=1 SV=4   | PSMB6_HUMAN   | PSMB6   | 25 kDa  | 22 | 38 | 36 | 37 | 39 | 45 | 29 | 38 | 22 | 19 | 37 | 19 |
| 106 | Proteasome subunit beta type-3                                       | OS=Homo sapiens OX=9066 GN=PSMB3 PE=1 SV=2   | PSB3_HUMAN    | PSMB3   | 23 kDa  | 26 | 38 | 31 | 38 | 44 | 37 | 27 | 32 | 20 | 32 | 32 | 25 |
| 107 | 26S proteasome non-ATPase regulatory subunit 13                      | OS=Homo sapiens OX=9066 GN=PSMD13 PE=1 SV=2  | PSMD13_HUMAN  | PSMD13  | 43 kDa  | 38 | 42 | 36 | 37 | 42 | 44 | 29 | 40 | 31 | 35 | 34 | 37 |
| 108 | Semaphorin-7A                                                        | OS=Homo sapiens OX=9066 GN=SEMA7A PE=1 SV=1  | SEMA7A_HUMAN  | SEMA7A  | 75 kDa  | 31 | 33 | 33 | 37 | 32 | 37 | 51 | 49 | 46 | 47 | 43 | 42 |
| 109 | Dynamin-2                                                            | OS=Homo sapiens OX=9066 GN=DNM2 PE=1 SV=2    | DNM2_HUMAN    | DNM2    | 98 kDa  | 16 | 28 | 36 | 35 | 43 | 30 | 26 | 34 | 37 | 32 | 35 | 38 |
| 110 | 26S proteasome non-ATPase regulatory subunit 3                       | OS=Homo sapiens OX=9066 GN=PSMD3 PE=1 SV=2   | PSMD3_HUMAN   | PSMD3   | 61 kDa  | 32 | 44 | 38 | 40 | 38 | 27 | 34 | 39 | 27 | 33 | 33 | 29 |
| 111 | Ezrin                                                                | OS=Homo sapiens OX=9066 GN=EZR PE=1 SV=4     | EZR_HUMAN     | EZR     | 69 kDa  | 36 | 30 | 35 | 32 | 39 | 36 | 37 | 30 | 32 | 27 | 33 | 28 |
| 112 | AP-2 complex subunit mu                                              | OS=Homo sapiens OX=9066 GN=AP2M1 PE=1 SV=2   | AP2M1_HUMAN   | AP2M1   | 50 kDa  | 37 | 30 | 44 | 50 | 43 | 44 | 30 | 23 | 34 | 26 | 26 | 30 |
| 113 | Immunoglobulin kappa light chain                                     | OS=Homo sapiens OX=9066 PE=1 SV=1            | IGK_HUMAN     | IGK     | 23 kDa  | 44 | 36 | 30 | 36 | 50 | 50 | 46 | 40 | 33 | 38 | 50 | 48 |
| 114 | Nucleosome assembly protein 1-like 4                                 | OS=Homo sapiens OX=9066 GN=NAP1L4 PE=1 SV=1  | NAP1L4_HUMAN  | NAP1L4  | 43 kDa  | 38 | 48 | 41 | 47 | 52 | 43 | 36 | 43 | 29 | 34 | 36 | 36 |
| 115 | Vacuolar protein sorting-associated protein 13A                      | OS=Homo sapiens OX=9066 GN=VPS13A PE=1 SV=2  | VPS13A_HUMAN  | VPS13A  | 360 kDa | 21 | 21 | 30 | 20 | 23 | 22 | 35 | 31 | 34 | 36 | 29 | 33 |
| 116 | Proteasome activator complex subunit 1                               | OS=Homo sapiens OX=9066 GN=PSME1 PE=1 SV=1   | PSME1_HUMAN   | PSME1   | 29 kDa  | 27 | 39 | 33 | 41 | 40 | 38 | 28 | 37 | 34 | 36 | 32 | 35 |
| 117 | cAMP-dependent protein kinase catalytic subunit alpha                | OS=Homo sapiens OX=9066 GN=PRKACA PE=1 SV=2  | KAPCA_HUMAN   | PRKACA  | 41 kDa  | 43 | 41 | 37 | 40 | 39 | 33 | 25 | 32 | 29 | 34 | 32 | 25 |
| 118 | Calreticulin                                                         | OS=Homo sapiens OX=9066 GN=CALR PE=1 SV=1    | CALR_HUMAN    | CALR    | 48 kDa  | 32 | 28 | 29 | 26 | 27 | 24 | 42 | 38 | 44 | 39 | 38 | 48 |
| 119 | Calpain-5                                                            | OS=Homo sapiens OX=9066 GN=CAPN5 PE=1 SV=2   | CAPN5_HUMAN   | CAPN5   | 73 kDa  | 31 | 26 | 24 | 25 | 30 | 23 | 43 | 42 | 38 | 41 | 38 | 35 |
| 120 | DnaI homolog subfamily C member 13                                   | OS=Homo sapiens OX=9066 GN=DNAJC13 PE=1 SV=5 | DNJC13_HUMAN  | DNJC13  | 254 kDa | 16 | 33 | 28 | 50 | 40 | 52 | 14 | 19 | 24 | 23 | 35 | 33 |
| 121 | Sodium/potassium transporting ATPase subunit alpha-1                 | OS=Homo sapiens OX=9066 GN=ATP1A1 PE=1 SV=1  | ATP1A1_HUMAN  | ATP1A1  | 113 kDa | 26 | 35 | 26 | 37 | 37 | 31 | 34 | 39 | 32 | 31 | 36 | 31 |
| 122 | 26S proteasome regulatory subunit 6B                                 | OS=Homo sapiens OX=9066 GN=PSMC4 PE=1 SV=2   | PRSGB_HUMAN   | PSMC4   | 47 kDa  | 26 | 40 | 35 | 26 | 38 | 36 | 26 | 32 | 28 | 32 | 31 | 31 |
| 123 | Importin-7                                                           | OS=Homo sapiens OX=9066 GN=IPO7 PE=1 SV=1    | IPO7_HUMAN    | IPO7    | 120 kDa | 40 | 27 | 37 | 29 | 38 | 33 | 34 | 37 | 24 | 26 | 30 | 37 |
| 124 | Proteasome subunit alpha type-1                                      | OS=Homo sapiens OX=9066 GN=PSMA1 PE=1 SV=1   | PSA1_HUMAN    | PSMA1   | 30 kDa  | 30 | 37 | 36 | 35 | 39 | 30 | 26 | 29 | 27 | 26 | 34 | 25 |
| 125 | Elongation factor 1-alpha                                            | OS=Homo sapiens OX=9066 GN=EEF1A1 PE=1 SV=1  | EF1A1_HUMAN   | EEF1A1  | 50 kDa  | 36 | 38 | 35 | 35 | 34 | 34 | 29 | 22 | 23 | 22 | 31 | 29 |
| 126 | Keratin, type II cytoskeletal 2 epidermal                            | OS=Homo sapiens OX=9066 GN=KRT2 PE=1 SV=2    | K22E_HUMAN    | KRT2    | 65 kDa  | 18 | 42 | 31 | 45 | 22 | 26 | 41 | 40 | 36 | 24 | 28 | 18 |
| 127 | Ras-related protein Rab-35                                           | OS=Homo sapiens OX=9066 GN=RAB35 PE=1 SV=1   | RAB35_HUMAN   | RAB35   | 23 kDa  | 48 | 39 | 39 | 56 | 39 | 40 | 33 | 44 | 40 | 39 | 33 | 41 |
| 128 | Ribose-phosphate pyrophosphokinase 1                                 | OS=Homo sapiens OX=9066 GN=PRPS1 PE=1 SV=2   | PRPS1_HUMAN   | PRPS1   | 35 kDa  | 25 | 23 | 32 | 30 | 42 | 37 | 22 | 28 | 35 | 35 | 28 | 39 |
| 129 | Basigin                                                              | OS=Homo sapiens OX=9066 GN=BSG PE=1 SV=2     | BSG_HUMAN     | BSG     | 42 kDa  | 41 | 37 | 44 | 42 | 39 | 38 | 39 | 35 | 41 | 35 | 35 | 37 |
| 130 | Atlastin-3                                                           | OS=Homo sapiens OX=9066 GN=ATL3 PE=1 SV=1    | ATL3_HUMAN    | ATL3    | 61 kDa  | 38 | 35 | 36 | 30 | 33 | 27 | 34 | 29 | 33 | 32 | 30 | 31 |
| 131 | Cell division control protein 42 homolog                             | OS=Homo sapiens OX=9066 GN=CDC42 PE=1 SV=2   | CDC42_HUMAN   | CDC42   | 21 kDa  | 38 | 37 | 34 | 39 | 39 | 32 | 35 | 35 | 36 | 31 | 36 | 32 |
| 132 | 26S proteasome regulatory subunit 8                                  | OS=Homo sapiens OX=9066 GN=PSMC5 PE=1 SV=1   | PSMC5_HUMAN   | PSMC5   | 46 kDa  | 28 | 40 | 39 | 36 | 40 | 34 | 24 | 33 | 32 | 32 | 30 | 29 |
| 133 | 26S proteasome non-ATPase regulatory subunit 6                       | OS=Homo sapiens OX=9066 GN=PSMD6 PE=1 SV=1   | PSMD6_HUMAN   | PSMD6   | 46 kDa  | 25 | 34 | 31 | 37 | 39 | 40 | 23 | 30 | 24 | 28 | 34 | 32 |
| 134 | Endoplasmic reticulum chaperone                                      | OS=Homo sapiens OX=9066 GN=HSP90B1 PE=1 SV=1 | ENP90B1_HUMAN | HSP90B1 | 92 kDa  | 34 | 28 | 27 | 25 | 31 | 31 | 35 | 35 | 31 | 31 | 27 | 42 |
| 135 | Dynactin subunit 1                                                   | OS=Homo sapiens OX=9066 GN=DCTN1 PE=1 SV=3   | DCTN1_HUMAN   | DCTN1   | 142 kDa | 13 | 29 | 25 | 25 | 35 | 24 | 17 | 34 | 27 | 35 | 42 | 38 |
| 136 | ATP-dependent 6-phosphofructokinase, muscle type                     | OS=Homo sapiens OX=9066 GN=PFKM PE=1 SV=2    | PFKM_HUMAN    | PFKM    | 85 kDa  | 21 | 29 | 27 | 39 | 41 | 43 | 20 | 29 | 30 | 41 | 32 | 45 |
| 137 | Endoplasmic reticulum chaperone BIP                                  | OS=Homo sapiens OX=9066 GN=HSPA5 PE=1 SV=2   | BIP_HUMAN     | HSPA5   | 72 kDa  | 26 | 33 | 34 | 27 | 31 | 31 | 42 | 49 | 34 | 38 | 41 | 34 |
| 138 | Ras-related protein Rab-10                                           | OS=Homo sapiens OX=9066 GN=RAB10 PE=1 SV=1   | RAB10_HUMAN   | RAB10   | 23 kDa  | 36 | 40 | 33 | 37 | 35 | 33 | 19 | 27 | 24 | 24 | 27 | 21 |
| 139 | Proteasome subunit alpha type-6                                      | OS=Homo sapiens OX=9066 GN=PSMA6 PE=1 SV=1   | PSA6_HUMAN    | PSMA6   | 27 kDa  | 38 | 33 | 34 | 37 | 38 | 38 | 29 | 32 | 30 | 36 | 25 | 35 |
| 140 | Proteasome subunit alpha type-2                                      | OS=Homo sapiens OX=9066 GN=PSMA2 PE=1 SV=2   | PSA2_HUMAN    | PSMA2   | 26 kDa  | 35 | 33 | 31 | 35 | 41 | 31 | 25 | 24 | 30 | 33 | 26 | 35 |
| 141 | Coiled-coil and C2 domain-containing protein 1A                      | OS=Homo sapiens OX=9066 GN=CC2D1A PE=1 SV=1  | CC2D1A_HUMAN  | CC2D1A  | 104 kDa | 30 | 35 | 39 | 29 | 30 | 30 | 19 | 21 | 22 | 20 | 18 | 29 |
| 142 | Complement receptor type 1                                           | OS=Homo sapiens OX=9066 GN=CR1 PE=1 SV=3     | CR1_HUMAN     | CR1     | 224 kDa | 12 | 25 | 24 | 26 | 28 | 24 | 43 | 38 | 41 | 36 | 32 | 31 |
| 143 | ATP-dependent 6-phosphofructokinase, liver type                      | OS=Homo sapiens OX=9066 GN=PFKL PE=1 SV=6    | PFKL_HUMAN    | PFKL    | 85 kDa  | 33 | 34 | 35 | 42 | 35 | 41 | 25 | 38 | 37 | 39 | 35 | 36 |
| 144 | Proteasome subunit beta type-2                                       | OS=Homo sapiens OX=9066 GN=PSMB2 PE=1 SV=1   | PSB2_HUMAN    | PSMB2   | 23 kDa  | 26 | 35 | 27 | 30 | 35 | 21 | 26 | 25 | 21 | 30 | 28 | 24 |
| 145 | GTPase KRas                                                          | OS=Homo sapiens OX=9066 GN=KRAS PE=1 SV=1    | KRAS_HUMAN    | KRAS    | 22 kDa  | 38 | 31 | 32 | 35 | 34 | 27 | 31 | 32 | 31 | 33 | 27 | 34 |
| 146 | Proteasome adapter and scaffold protein ECM29                        | OS=Homo sapiens OX=9066 GN=ECAP5 PE=1 SV=2   | ECM29_HUMAN   | ECAP5   | 204 kDa | 22 | 30 | 28 | 31 | 34 | 40 | 19 | 27 | 13 | 21 | 23 | 24 |
| 147 | 26S proteasome regulatory subunit 4                                  | OS=Homo sapiens OX=9066 GN=PSMC1 PE=1 SV=1   | PRSGA_HUMAN   | PSMC1   | 49 kDa  | 32 | 28 | 35 | 41 | 44 | 34 | 27 | 31 | 33 | 34 | 26 | 32 |
| 148 | Flavin reductase (NADPH)                                             | OS=Homo sapiens OX=9066 GN=ELAVR PE=1 SV=3   | BLVRB_HUMAN   | BLVRB   | 22 kDa  | 34 | 32 | 31 | 27 | 29 | 36 | 31 | 34 | 35 | 35 | 30 | 29 |
| 149 | Protein disulfide-isomerase A3                                       | OS=Homo sapiens OX=9066 GN=PDIA3 PE=1 SV=4   | PDIA3_HUMAN   | PDIA3   | 57 kDa  | 30 | 24 | 25 | 23 | 27 | 27 | 45 | 36 | 38 | 37 | 36 | 35 |
| 150 | Immunoglobulin heavy constant gamma 2                                | OS=Homo sapiens OX=9066 GN=IGHG2 PE=1 SV=2   | IGHG2_HUMAN   | IGHG2   | 36 kDa  | 49 | 49 | 39 | 46 | 45 | 55 | 41 | 43 | 35 | 42 | 52 | 43 |
| 151 | Proteasome subunit alpha type-4                                      | OS=Homo sapiens OX=9066 GN=PSMA4 PE=1 SV=1   | PSA4_HUMAN    | PSMA4   | 29 kDa  | 23 | 23 | 25 | 28 | 31 | 25 | 27 | 26 | 19 | 31 | 28 | 22 |
| 152 | Calnexin                                                             | OS=Homo sapiens OX=9066 GN=CANX PE=1 SV=2    | CANX_HUMAN    | CANX    | 68 kDa  | 22 | 23 | 22 | 17 | 18 | 15 | 38 | 35 | 34 | 34 | 37 | 38 |
| 153 | Deoxyribose-phosphate aldolase                                       | OS=Homo sapiens OX=9066 GN=DERA PE=1 SV=2    | DEOC_HUMAN    | DERA    | 35 kDa  | 29 | 32 | 30 | 30 | 35 | 35 | 23 | 22 | 19 | 24 | 19 | 26 |
| 154 | 26S proteasome non-ATPase regulatory subunit 5                       | OS=Homo sapiens OX=9066 GN=PSMD5 PE=1 SV=3   | PSMD5_HUMAN   | PSMD5   | 56 kDa  | 24 | 28 | 25 | 26 | 33 | 34 | 16 | 34 | 18 | 22 | 34 | 37 |
| 155 | Alpha-centractin                                                     | OS=Homo sapiens OX=9066 GN=ACTR1A PE=1 SV=1  | ACTR1A_HUMAN  | ACTR1A  | 43 kDa  | 18 | 29 | 30 | 31 | 30 | 23 | 29 | 31 | 29 | 28 | 28 | 31 |
| 156 | Caprin-3                                                             | OS=Homo sapiens OX=9066 GN=CPR3 PE=1 SV=1    | CPR3_HUMAN    | CPR3    | 60 kDa  | 17 | 27 | 20 | 13 | 21 | 35 | 27 | 35 | 27 | 37 | 36 | 17 |
| 157 | Proteasome subunit beta type-7                                       | OS=Homo sapiens OX=9066 GN=PSMB7 PE=1 SV=1   | PSMB7_HUMAN   | PSMB7   | 30 kDa  | 17 | 32 | 29 | 32 | 42 | 21 | 16 | 20 | 12 | 18 | 20 | 21 |
| 158 | Phosphatidylinositolide phosphatase SAC1                             | OS=Homo sapiens OX=9066 GN=SACM1L PE=1 SV=2  | SAC1_HUMAN    | SACM1L  | 67 kDa  | 26 | 20 | 24 | 22 | 20 | 21 | 26 | 23 | 29 | 24 | 23 | 27 |
| 159 | Copper-transporting ATPase 1                                         | OS=Homo sapiens OX=9066 GN=ATP7A PE=1 SV=1   | ATP7A_HUMAN   | ATP7A   | 163 kDa | 22 | 20 | 24 | 19 | 15 | 21 | 30 | 27 | 31 | 29 | 33 | 27 |
| 160 | Glycophorin-A                                                        | OS=Homo sapiens OX=9066 GN=GYP A PE=1 SV=2   | GLPA_HUMAN    | GYP A   | 16 kDa  | 32 | 27 | 28 | 25 | 28 | 26 | 29 | 27 | 28 | 30 | 27 | 27 |
| 161 | 26S proteasome non-ATPase regulatory subunit 11                      | OS=Homo sapiens OX=9066 GN=PSMD11 PE=1 SV=3  | PSMD11_HUMAN  | PSMD11  | 47 kDa  | 26 | 32 | 26 | 29 | 29 | 23 | 23 | 29 | 18 | 21 | 24 | 24 |
| 162 | Tensin-1                                                             | OS=Homo sapiens OX=9066 GN=TNF1 PE=1 SV=2    | TNS1_HUMAN    | TNS1    | 186 kDa | 24 | 24 | 20 | 26 | 31 | 26 | 24 | 26 | 27 | 27 | 30 |    |



|     |                                                                                                                   |                  |           |         |    |    |    |    |    |    |    |    |    |    |    |    |
|-----|-------------------------------------------------------------------------------------------------------------------|------------------|-----------|---------|----|----|----|----|----|----|----|----|----|----|----|----|
| 181 | Ubiquitin-60S ribosomal protein L40 OS=Homo sapiens OX=9606 GN=UBA52 PE=1 SV=2                                    | RL40_HUMAN (+3)  | UBA52     | 15 kDa  | 24 | 21 | 23 | 27 | 22 | 20 | 21 | 17 | 19 | 18 | 18 | 18 |
| 182 | AP-2 complex subunit alpha-2 OS=Homo sapiens OX=9606 GN=AP2A2 PE=1 SV=2                                           | AP2A2_HUMAN      | AP2A2     | 104 kDa | 45 | 51 | 49 | 52 | 54 | 63 | 37 | 37 | 34 | 41 | 41 | 41 |
| 183 | 26S proteasome regulatory subunit 10B OS=Homo sapiens OX=9606 GN=PSMCG PE=1 SV=1                                  | PSMCG_HUMAN      | PSMCG     | 44 kDa  | 23 | 24 | 26 | 26 | 24 | 25 | 23 | 24 | 18 | 23 | 21 | 22 |
| 184 | Radixin OS=Homo sapiens OX=9606 GN=ROX PE=1 SV=1                                                                  | RADX_HUMAN       | ROX       | 69 kDa  | 33 | 31 | 35 | 31 | 37 | 33 | 39 | 31 | 39 | 35 | 30 | 32 |
| 185 | 14-3-3 protein epsilon OS=Homo sapiens OX=9606 GN=YWHAE PE=1 SV=1                                                 | 1433E_HUMAN      | YWHAE     | 29 kDa  | 17 | 20 | 23 | 19 | 22 | 19 | 31 | 32 | 20 | 32 | 24 | 20 |
| 186 | WD repeat-containing protein 91 OS=Homo sapiens OX=9606 GN=WDOR1 PE=1 SV=2                                        | WDOR1_HUMAN      | WDOR1     | 212 kDa | 18 | 25 | 19 | 25 | 31 | 27 | 8  | 17 | 11 | 18 | 16 | 20 |
| 187 | Importin-5 OS=Homo sapiens OX=9606 GN=IPO5 PE=1 SV=4                                                              | IPO5_HUMAN       | IPO5      | 125 kDa | 24 | 27 | 24 | 25 | 39 | 44 | 6  | 5  | 6  | 5  | 8  | 13 |
| 188 | Vesicle-associated membrane protein-associated protein A OS=Homo sapiens OX=9606 GN=VAPA PE=1 SV=3                | VAPA_HUMAN       | VAPA      | 28 kDa  | 16 | 22 | 26 | 19 | 19 | 21 | 25 | 27 | 20 | 28 | 25 | 15 |
| 189 | Phosphatidylinositol 4-kinase type 2-alpha OS=Homo sapiens OX=9606 GN=PI4K2A PE=1 SV=1                            | PI4K2A_HUMAN     | PI4K2A    | 54 kDa  | 21 | 11 | 21 | 23 | 24 | 18 | 22 | 15 | 27 | 22 | 25 | 21 |
| 190 | Fatty acid synthase OS=Homo sapiens OX=9606 GN=FASN PE=1 SV=3                                                     | FASN_HUMAN       | FASN      | 273 kDa | 19 | 27 | 13 | 20 | 36 | 27 | 11 | 24 | 7  | 6  | 17 | 17 |
| 191 | Unconventional myosin-XVilia OS=Homo sapiens OX=9606 GN=MYO18A PE=1 SV=3                                          | MY18A_HUMAN      | MYO18A    | 233 kDa | 7  | 26 | 17 | 21 | 29 | 19 | 13 | 20 | 14 | 21 | 27 | 23 |
| 192 | Myosin light chain 4 OS=Homo sapiens OX=9606 GN=MYL4 PE=1 SV=3                                                    | MYL4_HUMAN       | MYL4      | 22 kDa  | 22 | 27 | 31 | 32 | 32 | 29 | 19 | 17 | 17 | 24 | 21 | 20 |
| 193 | 26S proteasome non-ATPase regulatory subunit 14 OS=Homo sapiens OX=9606 GN=PSMD14 PE=1 SV=1                       | PSD0_HUMAN       | PSMD14    | 35 kDa  | 17 | 19 | 17 | 21 | 22 | 20 | 13 | 23 | 12 | 13 | 15 | 18 |
| 194 | Neutral cholesterol ester hydrolase 1 OS=Homo sapiens OX=9606 GN=NCEH1 PE=1 SV=3                                  | NCEH1_HUMAN      | NCEH1     | 46 kDa  | 21 | 16 | 20 | 17 | 14 | 20 | 26 | 21 | 25 | 23 | 25 | 25 |
| 195 | Immunoglobulin heavy constant gamma 3 OS=Homo sapiens OX=9606 GN=IGHG3 PE=1 SV=2                                  | IGHG3_HUMAN      | IGHG3     | 49 kDa  | 56 | 45 | 52 | 56 | 56 | 55 | 56 | 59 | 55 | 61 | 51 | 51 |
| 196 | Long-chain fatty acid-CoA ligase 3 OS=Homo sapiens OX=9606 GN=ACSL3 PE=1 SV=3                                     | ACSL3_HUMAN      | ACSL3     | 80 kDa  | 18 | 15 | 17 | 13 | 13 | 18 | 28 | 27 | 24 | 23 | 21 | 24 |
| 197 | Ras-related C3 botulinum toxin substrate 1 OS=Homo sapiens OX=9606 GN=RAC1 PE=1 SV=1                              | RAC1_HUMAN       | RAC1      | 21 kDa  | 29 | 24 | 27 | 27 | 24 | 26 | 16 | 14 | 20 | 22 | 17 | 23 |
| 198 | Protein XRP2 OS=Homo sapiens OX=9606 GN=RP2 PE=1 SV=4                                                             | XRP2_HUMAN       | RP2       | 40 kDa  | 15 | 15 | 17 | 13 | 16 | 13 | 22 | 18 | 21 | 26 | 18 | 16 |
| 199 | 26S proteasome non-ATPase regulatory subunit 12 OS=Homo sapiens OX=9606 GN=PSMD12 PE=1 SV=3                       | PSMD12_HUMAN     | PSMD12    | 53 kDa  | 23 | 24 | 27 | 23 | 27 | 26 | 12 | 20 | 14 | 18 | 18 | 21 |
| 200 | Vesicular integral-membrane protein VIP36 OS=Homo sapiens OX=9606 GN=LMAN2 PE=1 SV=1                              | LMAN2_HUMAN      | LMAN2     | 40 kDa  | 30 | 17 | 15 | 17 | 10 | 21 | 18 | 16 | 15 | 15 | 13 | 17 |
| 201 | Ras-related protein Rab-8A OS=Homo sapiens OX=9606 GN=RAB8A PE=1 SV=1                                             | RAB8A_HUMAN      | RAB8A     | 24 kDa  | 28 | 24 | 20 | 31 | 29 | 28 | 25 | 28 | 23 | 25 | 24 | 17 |
| 202 | Myosin regulatory light chain 12B OS=Homo sapiens OX=9606 GN=MYL12B PE=1 SV=2                                     | MYL12B_HUMAN     | MYL12B    | 20 kDa  | 18 | 37 | 26 | 44 | 43 | 25 | 12 | 12 | 12 | 9  | 15 | 12 |
| 203 | Beta-2-glycoprotein 1 OS=Homo sapiens OX=9606 GN=APHO PE=1 SV=3                                                   | APHO_HUMAN       | APHO      | 38 kDa  | 23 | 16 | 15 | 23 | 17 | 17 | 18 | 10 | 15 | 13 | 19 | 21 |
| 204 | COP9 signalosome complex subunit 4 OS=Homo sapiens OX=9606 GN=COP5A PE=1 SV=1                                     | COP5A_HUMAN      | COP5A     | 46 kDa  | 17 | 20 | 16 | 11 | 20 | 18 | 14 | 16 | 13 | 15 | 17 | 18 |
| 205 | Endoplasmic reticulum resident protein 44 OS=Homo sapiens OX=9606 GN=ERP44 PE=1 SV=1                              | ERP44_HUMAN      | ERP44     | 47 kDa  | 20 | 11 | 20 | 19 | 24 | 17 | 19 | 19 | 24 | 17 | 17 | 24 |
| 206 | Peptidyl-prolyl cis-trans isomerase FKBP3 OS=Homo sapiens OX=9606 GN=FKBP3 PE=1 SV=1                              | FKBP3_HUMAN      | FKBP3     | 25 kDa  | 27 | 17 | 25 | 25 | 24 | 25 | 17 | 18 | 13 | 16 | 13 | 17 |
| 207 | 26S proteasome non-ATPase regulatory subunit 7 OS=Homo sapiens OX=9606 GN=PSMD7 PE=1 SV=2                         | PSMD7_HUMAN      | PSMD7     | 37 kDa  | 15 | 23 | 23 | 19 | 26 | 27 | 14 | 20 | 15 | 16 | 20 | 21 |
| 208 | COP9 signalosome complex subunit 2 OS=Homo sapiens OX=9606 GN=COP52 PE=1 SV=1                                     | COP52_HUMAN      | COP52     | 52 kDa  | 13 | 20 | 12 | 15 | 20 | 19 | 19 | 15 | 15 | 21 | 15 | 19 |
| 209 | LaNC-like protein 2 OS=Homo sapiens OX=9606 GN=LANCL2 PE=1 SV=1                                                   | LANCL2_HUMAN     | LANCL2    | 51 kDa  | 5  | 18 | 22 | 20 | 23 | 22 | 17 | 17 | 18 | 25 | 25 | 31 |
| 210 | Intermediate conductance calcium-activated potassium channel protein 4 OS=Homo sapiens OX=9606 GN=KCNN4 PE=1 SV=1 | KCNN4_HUMAN      | KCNN4     | 48 kDa  | 21 | 20 | 14 | 25 | 22 | 19 | 19 | 18 | 20 | 21 | 17 | 19 |
| 211 | Blood group Rh(D) polypeptide OS=Homo sapiens OX=9606 GN=RHD PE=1 SV=3                                            | RHD_HUMAN        | RHD       | 45 kDa  | 39 | 34 | 34 | 36 | 32 | 31 | 26 | 37 | 36 | 40 | 29 | 35 |
| 212 | Actin, alpha cardiac muscle 1 OS=Homo sapiens OX=9606 GN=ACTC1 PE=1 SV=1                                          | ACTC1_HUMAN      | ACTC1     | 42 kDa  | 63 | 71 | 63 | 66 | 71 | 70 | 84 | 78 | 81 | 75 | 91 | 72 |
| 213 | Calpain-1 catalytic subunit OS=Homo sapiens OX=9606 GN=CAPN1 PE=1 SV=1                                            | CAPN1_HUMAN      | CAPN1     | 82 kDa  | 13 | 17 | 19 | 13 | 18 | 14 | 11 | 17 | 10 | 11 | 7  | 14 |
| 214 | Immunoglobulin heavy constant mu OS=Homo sapiens OX=9606 GN=IGHM PE=1 SV=4                                        | IGHM_HUMAN       | IGHM      | 49 kDa  | 10 | 16 | 13 | 15 | 20 | 18 | 18 | 20 | 19 | 16 | 25 | 19 |
| 215 | Guanine nucleotide-binding protein G(i) subunit alpha OS=Homo sapiens OX=9606 GN=GNAQ PE=1 SV=4                   | GNAQ_HUMAN       | GNAQ      | 42 kDa  | 16 | 14 | 18 | 21 | 17 | 19 | 20 | 19 | 20 | 19 | 21 | 20 |
| 216 | Syntaxin-7 OS=Homo sapiens OX=9606 GN=STX7 PE=1 SV=4                                                              | STX7_HUMAN       | STX7      | 30 kDa  | 15 | 25 | 22 | 21 | 21 | 19 | 19 | 18 | 23 | 23 | 18 | 20 |
| 217 | Urea transporter 1 OS=Homo sapiens OX=9606 GN=SLC14A1 PE=1 SV=2                                                   | UT1_HUMAN        | SLC14A1   | 43 kDa  | 14 | 10 | 12 | 13 | 13 | 16 | 18 | 19 | 14 | 18 | 16 | 19 |
| 218 | Galectin-3 OS=Homo sapiens OX=9606 GN=LGALS3 PE=1 SV=5                                                            | LEG3_HUMAN       | LGALS3    | 26 kDa  | 18 | 17 | 15 | 14 | 14 | 19 | 18 | 20 | 17 | 20 | 19 | 13 |
| 219 | Phospholipid transfer protein C2CD2L OS=Homo sapiens OX=9606 GN=C2CD2L PE=1 SV=3                                  | C2CD2L_HUMAN     | C2CD2L    | 76 kDa  | 15 | 19 | 19 | 20 | 19 | 20 | 22 | 14 | 15 | 12 | 19 | 18 |
| 220 | Dynactin subunit 2 OS=Homo sapiens OX=9606 GN=DNCT2 PE=1 SV=4                                                     | DNCT2_HUMAN      | DNCT2     | 44 kDa  | 6  | 21 | 13 | 18 | 18 | 9  | 13 | 19 | 16 | 17 | 24 | 17 |
| 221 | G protein-coupled receptor kinase 6 OS=Homo sapiens OX=9606 GN=GRK6 PE=1 SV=2                                     | GRK6_HUMAN       | GRK6      | 66 kDa  | 17 | 12 | 19 | 14 | 12 | 18 | 16 | 15 | 15 | 14 | 12 | 15 |
| 222 | Immunoglobulin lambda constant 2 OS=Homo sapiens OX=9606 GN=IGLC2 PE=1 SV=1                                       | IGLC2_HUMAN (+1) | IGLC2     | 11 kDa  | 23 | 14 | 13 | 16 | 22 | 19 | 16 | 16 | 17 | 19 | 22 | 17 |
| 223 | Protein arginine N-methyltransferase 5 OS=Homo sapiens OX=9606 GN=PRMT5 PE=1 SV=4                                 | PRMT5_HUMAN      | PRMT5     | 73 kDa  | 7  | 21 | 15 | 12 | 21 | 16 | 11 | 13 | 8  | 8  | 10 | 8  |
| 224 | Gamma-aminobutyric acid receptor-associated protein-like 2 OS=Homo sapiens OX=9606 GN=GABARAPL2 PE=1 SV=1         | GABARAPL2_HUMAN  | GABARAPL2 | 14 kDa  | 15 | 16 | 16 | 14 | 17 | 15 | 9  | 17 | 17 | 16 | 14 | 14 |
| 225 | Heat shock 70 kDa protein 4 OS=Homo sapiens OX=9606 GN=HSPA4 PE=1 SV=4                                            | HSPA4_HUMAN      | HSPA4     | 94 kDa  | 10 | 20 | 17 | 11 | 26 | 15 | 21 | 24 | 18 | 17 | 15 | 12 |
| 226 | Ras-related protein Rab-5C OS=Homo sapiens OX=9606 GN=RAB5C PE=1 SV=2                                             | RAB5C_HUMAN      | RAB5C     | 23 kDa  | 15 | 17 | 14 | 15 | 16 | 15 | 21 | 22 | 19 | 19 | 16 | 14 |
| 227 | Serine/threonine-protein kinase WNK1 OS=Homo sapiens OX=9606 GN=WNK1 PE=1 SV=2                                    | WNK1_HUMAN       | WNK1      | 251 kDa | 5  | 13 | 16 | 14 | 17 | 10 | 9  | 17 | 12 | 15 | 20 | 20 |
| 228 | Solute carrier family 40 member 1 OS=Homo sapiens OX=9606 GN=SLC40A1 PE=1 SV=1                                    | SLC40A1_HUMAN    | SLC40A1   | 63 kDa  | 16 | 14 | 18 | 20 | 16 | 18 | 24 | 19 | 19 | 18 | 18 | 17 |
| 229 | Peptidyl-prolyl cis-trans isomerase B OS=Homo sapiens OX=9606 GN=PPIB PE=1 SV=2                                   | PPIB_HUMAN       | PPIB      | 24 kDa  | 11 | 14 | 13 | 14 | 13 | 10 | 15 | 17 | 15 | 19 | 16 | 18 |
| 230 | F-actin-capping protein subunit beta OS=Homo sapiens OX=9606 GN=CAPZB PE=1 SV=4                                   | CAPZB_HUMAN      | CAPZB     | 31 kDa  | 11 | 15 | 17 | 20 | 19 | 20 | 17 | 18 | 13 | 20 | 18 | 16 |
| 231 | Very long-chain 3-oxoacyl-CoA reductase OS=Homo sapiens OX=9606 GN=HSD17B12 PE=1 SV=2                             | HSD17B12_HUMAN   | HSD17B12  | 34 kDa  | 15 | 14 | 16 | 17 | 15 | 20 | 18 | 21 | 19 | 17 | 19 | 19 |
| 232 | SH3 domain-binding glutamic acid-rich-like protein OS=Homo sapiens OX=9606 GN=SH3BGR1 PE=1 SV=1                   | SH3B1_HUMAN      | SH3BGR1   | 13 kDa  | 22 | 18 | 21 | 21 | 20 | 15 | 15 | 16 | 19 | 18 | 17 | 19 |
| 233 | WD repeat-containing protein 91 OS=Homo sapiens OX=9606 GN=WDOR1 PE=1 SV=2                                        | WDOR1_HUMAN      | WDOR1     | 83 kDa  | 15 | 18 | 17 | 13 | 22 | 26 | 5  | 16 | 9  | 14 | 17 | 19 |
| 234 | Carbonic anhydrase 1 OS=Homo sapiens OX=9606 GN=CA1 PE=1 SV=2                                                     | CAH1_HUMAN       | CA1       | 29 kDa  | 18 | 20 | 16 | 17 | 16 | 15 | 21 | 24 | 22 | 17 | 10 | 13 |
| 235 | Peroxiredoxin-1 OS=Homo sapiens OX=9606 GN=PRDX1 PE=1 SV=1                                                        | PRDX1_HUMAN      | PRDX1     | 23 kDa  | 19 | 21 | 16 | 19 | 26 | 23 | 23 | 24 | 15 | 14 | 19 | 15 |
| 236 | Guanine nucleotide-binding protein G(i)(G)/G(t) subunit beta-2 OS=Homo sapiens OX=9606 GN=GNB2 PE=1 SV=3          | GNB2_HUMAN       | GNB2      | 37 kDa  | 53 | 44 | 44 | 45 | 45 | 29 | 28 | 38 | 44 | 41 | 44 | 59 |
| 237 | BMP-2-inducible protein kinase OS=Homo sapiens OX=9606 GN=BMP2K PE=1 SV=2                                         | BMP2K_HUMAN      | BMP2K     | 129 kDa | 16 | 12 | 11 | 14 | 13 | 14 | 10 | 17 | 12 | 14 | 14 | 19 |
| 238 | Carnitine O-palmitoyltransferase 1, liver isoform OS=Homo sapiens OX=9606 GN=CPT1A PE=1 SV=2                      | CPT1A_HUMAN      | CPT1A     | 88 kDa  | 6  | 11 | 8  | 5  | 10 | 7  | 22 | 19 | 22 | 22 | 22 | 19 |
| 239 | Junctional adhesion molecule A OS=Homo sapiens OX=9606 GN=J11R PE=1 SV=1                                          | JAM1_HUMAN       | F11R      | 33 kDa  | 14 | 16 | 17 | 14 | 13 | 16 | 16 | 15 | 18 | 24 | 18 | 19 |
| 240 | DnaI homolog subfamily B member 1 OS=Homo sapiens OX=9606 GN=DNAB1 PE=1 SV=4                                      | DNAB1_HUMAN      | DNAB1     | 38 kDa  | 13 | 11 | 17 | 14 | 17 | 16 | 13 | 15 | 14 | 11 | 15 | 15 |
| 241 | Moosin OS=Homo sapiens OX=9606 GN=MSN PE=1 SV=3                                                                   | MOES_HUMAN       | MSN       | 68 kDa  | 35 | 29 | 34 | 31 | 29 | 29 | 31 | 22 | 36 | 23 | 26 | 30 |
| 242 | Ubiquitin carboxyl-terminal hydrolase 14 OS=Homo sapiens OX=9606 GN=USP14 PE=1 SV=3                               | UBP14_HUMAN      | USP14     | 56 kDa  | 12 | 19 | 11 | 13 | 22 | 17 | 12 | 17 | 10 | 15 | 17 | 10 |
| 243 | Vesicle-fusing ATPase OS=Homo sapiens OX=9606 GN=NSF PE=1 SV=3                                                    | NSF_HUMAN        | NSF       | 83 kDa  | 11 | 10 | 15 | 7  | 18 | 22 | 13 | 15 | 11 | 7  | 10 | 14 |
| 244 | CB1 cannabinoid receptor-interacting protein 1 OS=Homo sapiens OX=9606 GN=CNRIP1 PE=1 SV=1                        | CNRIP1_HUMAN     | CNRIP1    | 19 kDa  | 5  | 17 | 16 | 18 | 17 | 9  | 14 | 17 | 10 | 17 | 16 | 18 |
| 245 | AP-1 complex subunit beta-1 OS=Homo sapiens OX=9606 GN=AP1B1 PE=1 SV=2                                            | AP1B1_HUMAN      | AP1B1     | 105 kDa | 46 | 55 | 52 | 59 | 59 | 53 | 37 | 42 | 46 | 41 | 47 | 33 |
| 246 | COP9 signalosome complex subunit 3 OS=Homo sapiens OX=9606 GN=COP53 PE=1 SV=3                                     | COP53_HUMAN      | COP53     | 48 kDa  | 15 | 14 | 13 | 12 | 16 | 16 | 19 | 16 | 12 | 14 | 17 | 11 |
| 247 | Transforming protein RhoA OS=Homo sapiens OX=9606 GN=RHOA PE=1 SV=1                                               | RHOA_HUMAN       | RHOA      | 22 kDa  | 16 | 12 | 16 | 18 | 18 | 13 | 11 | 15 | 12 | 15 | 9  | 16 |
| 248 | Syntaxin-binding protein 3 OS=Homo sapiens OX=9606 GN=STXB3 PE=1 SV=2                                             | STXB3_HUMAN      | STXB3     | 68 kDa  | 9  | 11 | 8  | 12 | 12 | 10 | 19 | 24 | 15 | 15 | 17 | 17 |
| 249 | Guanine nucleotide-binding protein G(i) subunit alpha OS=Homo sapiens OX=9606 GN=GNAI3 PE=1 SV=3                  | GNAI3_HUMAN      | GNAI3     | 60 kDa  | 62 | 54 | 61 | 54 | 53 | 65 | 68 | 57 | 58 | 54 | 64 | 64 |
| 250 | Monocarboxylate transporter 1 OS=Homo sapiens OX=9606 GN=SLC16A1 PE=1 SV=3                                        | MDT1_HUMAN       | SLC16A1   | 54 kDa  | 15 | 12 | 17 | 16 | 12 | 13 | 16 | 12 | 12 | 13 | 11 | 10 |
| 251 | Small integral membrane protein 1 OS=Homo sapiens OX=9606 GN=SMIM1 PE=1 SV=1                                      | SMIM1_HUMAN      | SMIM1     | 9 kDa   | 13 | 15 | 13 | 8  | 14 | 11 | 25 | 21 | 13 | 14 | 18 | 14 |
| 252 | Phosphoribosyl pyrophosphate synthase-associated protein 2 OS=Homo sapiens OX=9606 GN=PRPSAP2 PE=1 SV=1           | KPRB_HUMAN       | PRPSAP2   | 41 kDa  | 10 | 16 | 10 | 11 | 15 | 18 | 9  | 13 | 14 | 12 | 15 | 13 |
| 253 | Ras-related protein Rab-21 OS=Homo sapiens OX=9606 GN=RAB21 PE=1 SV=3                                             | RAB21_HUMAN      | RAB21     | 24 kDa  | 14 | 11 | 14 | 15 | 12 | 14 | 14 | 14 | 19 | 15 | 16 | 16 |
| 254 | Zinc transporter 1 OS=Homo sapiens OX=9606 GN=SLC30A1 PE=1 SV=3                                                   | ZNT1_HUMAN       | SLC30A1   | 55 kDa  | 9  | 14 | 12 | 13 | 12 | 11 | 13 | 15 | 12 | 18 | 14 | 14 |
| 255 | Ras-related protein Rab-7a OS=Homo sapiens OX=9606 GN=RAB7A PE=1 SV=1                                             | RAB7A_HUMAN      | RAB7A     | 23 kDa  | 12 | 12 | 13 | 15 | 10 | 14 | 12 | 15 | 15 | 15 | 17 | 13 |
| 256 | Serine/threonine-protein phosphatase 6 catalytic subunit OS=Homo sapiens OX=9606 GN=PPP6C PE=1 SV=1               | PPP6C_HUMAN      | PPP6C     | 35 kDa  | 10 | 13 | 16 | 16 | 18 | 13 | 8  | 9  | 13 | 12 | 10 | 18 |
| 257 | Calmodulin-1 OS=Homo sapiens OX                                                                                   |                  |           |         |    |    |    |    |    |    |    |    |    |    |    |    |



|     |                                                                        |                                     |      |      |               |          |         |    |    |    |    |    |    |    |    |    |    |    |    |
|-----|------------------------------------------------------------------------|-------------------------------------|------|------|---------------|----------|---------|----|----|----|----|----|----|----|----|----|----|----|----|
| 273 | Cytoskeleton-associated protein 5                                      | OX=Homo sapiens OX=9606 GN=CKAP5    | Pe=1 | SV=3 | CKAP5_HUMAN   | CKAP5    | 226 kDa | 20 | 13 | 18 | 21 | 18 | 19 | 5  | 2  | 4  | 4  | 3  | 7  |
| 274 | Fructosamine-3-kinase                                                  | OX=Homo sapiens OX=9606 GN=FN3K     | Pe=1 | SV=1 | FN3K_HUMAN    | FN3K     | 35 kDa  | 13 | 13 | 15 | 9  | 12 | 15 | 10 | 17 | 13 | 12 | 12 | 14 |
| 275 | Multiple inositol polyphosphate phosphatase 1                          | OX=Homo sapiens OX=9606 GN=MINPP1   | Pe=1 | SV=1 | MINP1_HUMAN   | MINPP1   | 55 kDa  | 11 | 10 | 9  | 9  | 6  | 9  | 15 | 15 | 12 | 12 | 13 | 10 |
| 276 | Transmembrane protein 222                                              | OX=Homo sapiens OX=9606 GN=TMEM222  | Pe=1 | SV=2 | TM222_HUMAN   | TMEM222  | 23 kDa  | 13 | 15 | 11 | 14 | 13 | 11 | 20 | 19 | 13 | 19 | 18 | 15 |
| 277 | F-actin-capping protein subunit alpha-1                                | OX=Homo sapiens OX=9606 GN=CAPZA1   | Pe=1 | SV=3 | CAPZA1_HUMAN  | CAPZA1   | 33 kDa  | 6  | 12 | 10 | 11 | 18 | 14 | 12 | 8  | 11 | 18 | 15 | 15 |
| 278 | Phosphatidylinositol-binding protein assembly                          | OX=Homo sapiens OX=9606 GN=PICALM   | Pe=1 | SV=2 | PICALM_HUMAN  | PICALM   | 71 kDa  | 12 | 10 | 11 | 10 | 10 | 11 | 10 | 10 | 11 | 14 | 9  | 9  |
| 279 | Vesicle-trafficking protein SEC22B                                     | OX=Homo sapiens OX=9606 GN=SEC22B   | Pe=1 | SV=4 | SEC22B_HUMAN  | SEC22B   | 25 kDa  | 12 | 10 | 11 | 13 | 14 | 14 | 14 | 10 | 12 | 10 | 14 | 18 |
| 280 | Epoxide hydrolase 1                                                    | OX=Homo sapiens OX=9606 GN=EPHX1    | Pe=1 | SV=1 | EPHX1_HUMAN   | EPHX1    | 53 kDa  | 3  | 9  | 10 | 5  | 7  | 6  | 11 | 11 | 10 | 12 | 14 | 9  |
| 281 | Protein disulfide-isomerase A6                                         | OX=Homo sapiens OX=9606 GN=PDIA6    | Pe=1 | SV=1 | PDIA6_HUMAN   | PDIA6    | 48 kDa  | 5  | 8  | 8  | 8  | 10 | 8  | 13 | 15 | 13 | 13 | 14 | 14 |
| 282 | DNA damage-binding protein 1                                           | OX=Homo sapiens OX=9606 GN=DDB1     | Pe=1 | SV=1 | DDB1_HUMAN    | DDB1     | 127 kDa | 5  | 5  | 7  | 3  | 13 | 10 | 16 | 20 | 9  | 8  | 11 | 8  |
| 283 | Hydroxacylglythione hydrolase, mitochondrial                           | OX=Homo sapiens OX=9606 GN=HAGH     | Pe=1 | SV=2 | GLO2_HUMAN    | HAGH     | 34 kDa  | 14 | 13 | 12 | 11 | 9  | 11 | 12 | 11 | 15 | 15 | 7  | 9  |
| 284 | L-lactate dehydrogenase B chain                                        | OX=Homo sapiens OX=9606 GN=LDHB     | Pe=1 | SV=2 | LDHB_HUMAN    | LDHB     | 37 kDa  | 10 | 8  | 11 | 8  | 14 | 15 | 12 | 14 | 8  | 8  | 10 | 10 |
| 285 | Ras-related protein Rab-28                                             | OX=Homo sapiens OX=9606 GN=RAB28    | Pe=1 | SV=1 | RAB28_HUMAN   | RAB28    | 24 kDa  | 13 | 10 | 11 | 16 | 13 | 16 | 12 | 9  | 10 | 6  | 10 | 13 |
| 286 | Multidrug resistance-associated protein 5                              | OX=Homo sapiens OX=9606 GN=ABCC5    | Pe=1 | SV=2 | MRP5_HUMAN    | ABCC5    | 161 kDa | 11 | 12 | 14 | 14 | 14 | 13 | 15 | 9  | 8  | 11 | 9  | 14 |
| 287 | ATP-binding cassette sub-family E member 1                             | OX=Homo sapiens OX=9606 GN=ABCE1    | Pe=1 | SV=1 | ABCE1_HUMAN   | ABCE1    | 102 kDa | 10 | 8  | 16 | 12 | 12 | 10 | 10 | 10 | 11 | 10 | 7  | 7  |
| 288 | Phosphoglycerate kinase 1                                              | OX=Homo sapiens OX=9606 GN=PGK1     | Pe=1 | SV=3 | PGK1_HUMAN    | PGK1     | 45 kDa  | 3  | 10 | 13 | 12 | 12 | 12 | 3  | 15 | 17 | 18 | 12 | 16 |
| 289 | Thioredoxin domain-containing protein 5                                | OX=Homo sapiens OX=9606 GN=TXNDC5   | Pe=1 | SV=2 | TXNDC5_HUMAN  | TXNDC5   | 48 kDa  | 6  | 9  | 10 | 8  | 11 | 10 | 19 | 13 | 15 | 15 | 16 | 13 |
| 290 | Phospholipid hydroperoxide glutathione peroxidase                      | OX=Homo sapiens OX=9606 GN=GPX4     | Pe=1 | SV=3 | GPX4_HUMAN    | GPX4     | 22 kDa  | 10 | 5  | 10 | 7  | 8  | 10 | 10 | 8  | 8  | 8  | 8  | 14 |
| 291 | Exportin-7                                                             | OX=Homo sapiens OX=9606 GN=XPO7     | Pe=1 | SV=3 | XPO7_HUMAN    | XPO7     | 124 kDa | 8  | 13 | 7  | 7  | 18 | 17 | 9  | 18 | 6  | 6  | 14 | 11 |
| 292 | Glucosidase 2 subunit beta                                             | OX=Homo sapiens OX=9606 GN=PRKCSH   | Pe=1 | SV=2 | GLU2B_HUMAN   | PRKCSH   | 59 kDa  | 5  | 6  | 8  | 7  | 8  | 8  | 15 | 17 | 14 | 15 | 15 | 16 |
| 293 | Band 4.1-like protein 2                                                | OX=Homo sapiens OX=9606 GN=EPB41L2  | Pe=1 | SV=1 | EPB41L2_HUMAN | EPB41L2  | 113 kDa | 11 | 8  | 6  | 9  | 9  | 7  | 9  | 7  | 11 | 12 | 6  | 9  |
| 294 | Syntaxin-4                                                             | OX=Homo sapiens OX=9606 GN=STX4     | Pe=1 | SV=2 | STX4_HUMAN    | STX4     | 34 kDa  | 11 | 9  | 8  | 7  | 9  | 9  | 15 | 14 | 14 | 13 | 15 | 12 |
| 295 | E3 ubiquitin-protein ligase RNF123                                     | OX=Homo sapiens OX=9606 GN=RNF123   | Pe=1 | SV=1 | RNF123_HUMAN  | RNF123   | 149 kDa | 7  | 11 | 9  | 3  | 19 | 14 | 13 | 20 | 8  | 6  | 11 | 17 |
| 296 | Staphylococcal nuclease domain-containing protein 1                    | OX=Homo sapiens OX=9606 GN=SNZD1    | Pe=1 | SV=1 | SNZD1_HUMAN   | SNZD1    | 102 kDa | 14 | 12 | 21 | 17 | 21 | 18 | 3  | 9  | 0  | 0  | 0  | 0  |
| 297 | Serine/threonine-protein kinase OXSR1                                  | OX=Homo sapiens OX=9606 GN=OXSR1    | Pe=1 | SV=1 | OXSR1_HUMAN   | OXSR1    | 58 kDa  | 9  | 13 | 8  | 7  | 16 | 14 | 4  | 11 | 9  | 10 | 12 | 12 |
| 298 | CD44 antigen                                                           | OX=Homo sapiens OX=9606 GN=CD44     | Pe=1 | SV=3 | CD44_HUMAN    | CD44     | 82 kDa  | 12 | 6  | 6  | 13 | 5  | 8  | 15 | 9  | 11 | 10 | 11 | 14 |
| 299 | EH domain-binding protein 1-like protein 1                             | OX=Homo sapiens OX=9606 GN=EHBPL1   | Pe=1 | SV=2 | EH1L1_HUMAN   | EHBPL1   | 162 kDa | 4  | 11 | 10 | 12 | 11 | 5  | 11 | 18 | 10 | 9  | 11 | 9  |
| 300 | Nucleosome assembly protein 1-like 1                                   | OX=Homo sapiens OX=9606 GN=NAP1L1   | Pe=1 | SV=1 | NP1L1_HUMAN   | NAP1L1   | 45 kDa  | 16 | 19 | 15 | 16 | 15 | 18 | 13 | 19 | 14 | 14 | 16 | 14 |
| 301 | Very-long-chain (3R)-3-hydroxyacyl-CoA dehydratase 3                   | OX=Homo sapiens OX=9606 GN=HACD3    | Pe=1 | SV=2 | HACD3_HUMAN   | HACD3    | 43 kDa  | 8  | 11 | 8  | 9  | 9  | 5  | 13 | 10 | 13 | 11 | 11 | 13 |
| 302 | Pyrrrole-5-carboxylate reductase 3                                     | OX=Homo sapiens OX=9606 GN=PYCR3    | Pe=1 | SV=3 | PSCR3_HUMAN   | PYCR3    | 29 kDa  | 8  | 10 | 11 | 10 | 15 | 17 | 7  | 9  | 12 | 13 | 7  | 14 |
| 303 | Small membrane A-kinase anchor protein                                 | OX=Homo sapiens OX=9606 GN=Czorf88  | Pe=1 | SV=2 | SMAKA_HUMAN   | Czorf88  | 11 kDa  | 14 | 13 | 13 | 10 | 9  | 8  | 11 | 11 | 10 | 9  | 10 | 8  |
| 304 | V-type proton ATPase catalytic subunit A                               | OX=Homo sapiens OX=9606 GN=ATP6V1A  | Pe=1 | SV=2 | VATA_HUMAN    | ATP6V1A  | 68 kDa  | 8  | 13 | 11 | 8  | 13 | 17 | 9  | 10 | 10 | 11 | 10 | 10 |
| 305 | Alpha-soluble NSF attachment protein                                   | OX=Homo sapiens OX=9606 GN=NAPA     | Pe=1 | SV=3 | SNAP_HUMAN    | NAPA     | 33 kDa  | 5  | 11 | 10 | 15 | 16 | 15 | 8  | 11 | 7  | 9  | 9  | 11 |
| 306 | RuvB-like 1                                                            | OX=Homo sapiens OX=9606 GN=RUVBL1   | Pe=1 | SV=1 | RUVBL1_HUMAN  | RUVBL1   | 50 kDa  | 13 | 10 | 13 | 8  | 16 | 15 | 7  | 7  | 6  | 5  | 12 | 9  |
| 307 | Phenylalanine-tRNA ligase beta subunit                                 | OX=Homo sapiens OX=9606 GN=FAFSB    | Pe=1 | SV=3 | SYFB_HUMAN    | FAFSB    | 66 kDa  | 13 | 12 | 16 | 16 | 17 | 15 | 4  | 4  | 0  | 2  | 0  | 8  |
| 308 | V-type proton ATPase 116 kDa subunit a isoform 1                       | OX=Homo sapiens OX=9606 GN=ATP6V0A1 | Pe=1 | SV=3 | VPP1_HUMAN    | ATP6V0A1 | 96 kDa  | 6  | 4  | 6  | 2  | 0  | 5  | 12 | 14 | 18 | 16 | 19 | 11 |
| 309 | Calcium-binding protein 39                                             | OX=Homo sapiens OX=9606 GN=CA839    | Pe=1 | SV=1 | CA839_HUMAN   | CA839    | 40 kDa  | 5  | 9  | 7  | 10 | 8  | 5  | 8  | 10 | 8  | 10 | 6  | 9  |
| 310 | V-type proton ATPase subunit B, brain isoform                          | OX=Homo sapiens OX=9606 GN=ATP6V1B2 | Pe=1 | SV=3 | VATB2_HUMAN   | ATP6V1B2 | 57 kDa  | 11 | 14 | 9  | 10 | 13 | 10 | 14 | 13 | 7  | 5  | 12 | 9  |
| 311 | Hemoglobin subunit gamma-2                                             | OX=Homo sapiens OX=9606 GN=HBG2     | Pe=1 | SV=2 | HBG2_HUMAN    | HBG2     | 16 kDa  | 15 | 18 | 13 | 16 | 14 | 14 | 24 | 21 | 25 | 18 | 13 | 13 |
| 312 | AP-2 complex subunit sigma                                             | OX=Homo sapiens OX=9606 GN=AP2S1    | Pe=1 | SV=2 | AP2S1_HUMAN   | AP2S1    | 17 kDa  | 9  | 11 | 11 | 12 | 12 | 13 | 8  | 12 | 7  | 8  | 6  | 7  |
| 313 | RNA 3'-terminal phosphate cyclase                                      | OX=Homo sapiens OX=9606 GN=RTCA     | Pe=1 | SV=1 | RTCA_HUMAN    | RTCA     | 39 kDa  | 9  | 10 | 10 | 9  | 10 | 10 | 6  | 8  | 9  | 9  | 7  | 12 |
| 314 | Diacylglycerol kinase alpha                                            | OX=Homo sapiens OX=9606 GN=DGKA     | Pe=1 | SV=3 | DGKA_HUMAN    | DGKA     | 83 kDa  | 0  | 5  | 8  | 9  | 10 | 7  | 4  | 9  | 8  | 10 | 14 | 11 |
| 315 | Protein DDH1 homolog 2                                                 | OX=Homo sapiens OX=9606 GN=DDH2     | Pe=1 | SV=1 | DDH2_HUMAN    | DDH2     | 45 kDa  | 12 | 14 | 10 | 9  | 11 | 11 | 12 | 14 | 11 | 10 | 11 | 11 |
| 316 | Perilipin-3                                                            | OX=Homo sapiens OX=9606 GN=PLIN3    | Pe=1 | SV=3 | PLIN3_HUMAN   | PLIN3    | 47 kDa  | 3  | 8  | 6  | 7  | 6  | 14 | 6  | 8  | 10 | 13 | 16 | 10 |
| 317 | Reticulon-3                                                            | OX=Homo sapiens OX=9606 GN=RTN3     | Pe=1 | SV=2 | RTN3_HUMAN    | RTN3     | 113 kDa | 14 | 6  | 11 | 16 | 14 | 12 | 9  | 9  | 12 | 10 | 8  | 12 |
| 318 | Retinal dehydrogenase 1                                                | OX=Homo sapiens OX=9606 GN=ALDH1A1  | Pe=1 | SV=2 | ALDH1A1_HUMAN | ALDH1A1  | 55 kDa  | 6  | 7  | 6  | 4  | 13 | 10 | 18 | 19 | 7  | 7  | 13 | 8  |
| 319 | Protein VAC14 homolog                                                  | OX=Homo sapiens OX=9606 GN=VAC14    | Pe=1 | SV=1 | VAC14_HUMAN   | VAC14    | 88 kDa  | 2  | 6  | 10 | 8  | 11 | 11 | 6  | 9  | 6  | 12 | 14 | 17 |
| 320 | Saccharopine dehydrogenase-like oxidoreductase                         | OX=Homo sapiens OX=9606 GN=SCCPDH   | Pe=1 | SV=1 | SCCPDH_HUMAN  | SCCPDH   | 47 kDa  | 10 | 11 | 7  | 8  | 6  | 11 | 8  | 10 | 11 | 15 | 14 | 12 |
| 321 | Reticulon-4                                                            | OX=Homo sapiens OX=9606 GN=RTM4     | Pe=1 | SV=2 | RTM4_HUMAN    | RTM4     | 130 kDa | 13 | 14 | 14 | 12 | 16 | 16 | 8  | 7  | 6  | 7  | 8  | 5  |
| 322 | STE20-related kinase adapter protein beta                              | OX=Homo sapiens OX=9606 GN=STRADB   | Pe=1 | SV=1 | STRAB_HUMAN   | STRADB   | 47 kDa  | 6  | 7  | 6  | 6  | 12 | 6  | 15 | 8  | 12 | 11 | 10 | 11 |
| 323 | Transmembrane emp24 domain-containing protein 10                       | OX=Homo sapiens OX=9606 GN=TMED10   | Pe=1 | SV=2 | TMED10_HUMAN  | TMED10   | 10 kDa  | 10 | 8  | 9  | 11 | 10 | 10 | 9  | 12 | 12 | 12 | 9  | 9  |
| 324 | Calpain small subunit 1                                                | OX=Homo sapiens OX=9606 GN=CAPNS1   | Pe=1 | SV=1 | CPNS1_HUMAN   | CAPNS1   | 28 kDa  | 9  | 9  | 10 | 10 | 13 | 9  | 7  | 8  | 5  | 5  | 7  | 11 |
| 325 | Ras-related protein Rab-18                                             | OX=Homo sapiens OX=9606 GN=RAB18    | Pe=1 | SV=1 | RAB18_HUMAN   | RAB18    | 23 kDa  | 9  | 9  | 9  | 11 | 6  | 8  | 11 | 12 | 7  | 7  | 14 | 8  |
| 326 | E3 ubiquitin-protein ligase KCMF1                                      | OX=Homo sapiens OX=9606 GN=KCMF1    | Pe=1 | SV=2 | KCMF1_HUMAN   | KCMF1    | 42 kDa  | 4  | 10 | 12 | 8  | 9  | 8  | 10 | 10 | 11 | 15 | 12 | 11 |
| 327 | Transcriptional activator protein Pur-alpha                            | OX=Homo sapiens OX=9606 GN=PURA     | Pe=1 | SV=2 | PURA_HUMAN    | PURA     | 35 kDa  | 10 | 13 | 9  | 11 | 10 | 13 | 11 | 13 | 8  | 12 | 14 | 9  |
| 328 | Vesicle-associated membrane protein-associated protein 8/C             | OX=Homo sapiens OX=9606 GN=VAPB     | Pe=1 | SV=3 | VAPB_HUMAN    | VAPB     | 27 kDa  | 10 | 18 | 13 | 13 | 10 | 11 | 9  | 10 | 11 | 10 | 15 | 12 |
| 329 | Solute carrier family 2, facilitated glucose transporter member 14     | OX=Homo sapiens OX=9606 GN=SLC2A14  | Pe=2 | SV=1 | GTR14_HUMAN   | SLC2A14  | 56 kDa  | 6  | 4  | 7  | 6  | 8  | 5  | 11 | 6  | 11 | 9  | 6  | 11 |
| 330 | Heat shock protein beta-1                                              | OX=Homo sapiens OX=9606 GN=HSPB1    | Pe=1 | SV=2 | HSPB1_HUMAN   | HSPB1    | 23 kDa  | 8  | 15 | 14 | 12 | 15 | 16 | 5  | 6  | 7  | 6  | 5  | 5  |
| 331 | COP9 signalosome complex subunit 6                                     | OX=Homo sapiens OX=9606 GN=COP56    | Pe=1 | SV=1 | CSN6_HUMAN    | COP56    | 36 kDa  | 6  | 3  | 7  | 8  | 11 | 6  | 15 | 16 | 7  | 6  | 8  | 7  |
| 332 | Phenylalanine-tRNA ligase alpha subunit                                | OX=Homo sapiens OX=9606 GN=FAFSA    | Pe=1 | SV=3 | SYFA_HUMAN    | FAFSA    | 58 kDa  | 11 | 8  | 13 | 16 | 11 | 14 | 6  | 2  | 3  | 4  | 6  | 6  |
| 333 | Leucine-rich repeat-containing protein 57                              | OX=Homo sapiens OX=9606 GN=LRRCS7   | Pe=1 | SV=1 | LRC57_HUMAN   | LRRCS7   | 27 kDa  | 7  | 9  | 6  | 9  | 7  | 5  | 9  | 8  | 6  | 5  | 3  | 6  |
| 334 | Arf-GAP with SH3 domain, ANK repeat and PH domain-containing protein 1 | OX=Homo sapiens OX=9606 GN=ASAP1    | Pe=1 | SV=4 | ASAP1_HUMAN   | ASAP1    | 126 kDa | 8  | 9  | 10 | 9  | 13 | 10 | 2  | 7  | 3  | 7  | 6  | 5  |
| 335 | Annexin A11                                                            | OX=Homo sapiens OX=9606 GN=ANXA11   | Pe=1 | SV=1 | ANXA11_HUMAN  | ANXA11   | 54 kDa  | 5  | 6  | 6  | 9  | 9  | 7  | 11 | 10 | 9  | 7  | 8  | 9  |
| 336 | GMP reductase 1                                                        | OX=Homo sapiens OX=9606 GN=GMPPR    | Pe=1 | SV=1 | GMPPR_HUMAN   | GMPPR    | 37 kDa  | 12 | 12 | 9  | 10 | 12 | 11 | 9  | 9  | 9  | 7  | 10 | 11 |
| 337 | Large neutral amino acids transporter small subunit 3                  | OX=Homo sapiens OX=9606 GN=SLC43A1  | Pe=1 | SV=1 | LAT3_HUMAN    | SLC43A1  | 61 kDa  | 10 | 11 | 8  | 10 | 10 | 6  | 13 | 14 | 9  | 9  | 11 | 8  |
| 338 | Phosphatidate phosphatase LPIN2                                        | OX=Homo sapiens OX=9606 GN=LPIN2    | Pe=1 | SV=1 | LPIN2_HUMAN   | LPIN2    | 99 kDa  | 3  | 5  | 4  | 4  | 5  | 8  | 12 | 13 | 7  | 9  | 14 | 9  |
| 339 | Solute carrier family 12 member 7                                      | OX=Homo sapiens OX=9606 GN=SLC12A7  | Pe=1 | SV=3 | S12A7_HUMAN   | SLC12A7  | 119 kDa | 12 | 8  | 9  | 7  | 8  | 2  | 11 | 3  | 5  | 7  | 6  | 6  |
| 340 | Adenylyltransferase                                                    | OX=Homo sapiens OX=9606 GN=ADSL     | Pe=1 | SV=2 | PURB_HUMAN    | ADSL     | 55 kDa  | 3  | 6  | 7  | 16 | 14 | 3  | 13 | 5  | 7  | 8  | 10 | 7  |
| 341 | Large neutral amino acids transporter small subunit 4                  | OX=Homo sapiens OX=9606 GN=SLC43A2  | Pe=1 | SV=1 | LAT4_HUMAN    | SLC43A2  | 63 kDa  | 7  | 5  | 5  | 6  | 6  | 6  | 7  | 6  | 6  | 7  | 9  | 10 |
| 342 | Protein ERGIC-53                                                       | OX=Homo sapiens OX=9606 GN=LMAN1    | Pe=1 | SV=2 | LMAN1_HUMAN   | LMAN1    | 58 kDa  | 10 | 9  | 11 | 10 | 11 | 7  | 11 | 7  | 5  | 11 | 9  | 7  |
| 343 | Methyllysine synthase                                                  | OX=Homo sapiens OX=9606 GN=WDOR7    | Pe=1 | SV=1 | WDR77_HUMAN   | MEP50    | 37 kDa  | 5  | 9  | 7  | 8  | 14 | 7  | 5  | 8  | 4  | 4  | 11 | 9  |
| 344 | Leukocyte surface antigen CD47                                         | OX=Homo sapiens OX=9606 GN=CD47     | Pe=1 | SV=1 | CD47_HUMAN    | CD47     | 35 k    |    |    |    |    |    |    |    |    |    |    |    |    |



|     |                                                                                                                         |                |             |         |    |    |    |    |    |    |    |    |    |    |    |    |
|-----|-------------------------------------------------------------------------------------------------------------------------|----------------|-------------|---------|----|----|----|----|----|----|----|----|----|----|----|----|
| 365 | GTP-binding nuclear protein Ran OS=Homo sapiens OX=9606 GN=GAN PE=1 SV=3                                                | RAN_HUMAN      | RAN         | 24 kDa  | 9  | 6  | 10 | 7  | 13 | 11 | 5  | 8  | 7  | 7  | 9  | 10 |
| 366 | Calcium and integrin-binding protein 1 OS=Homo sapiens OX=9606 GN=CIB1 PE=1 SV=4                                        | CIB1_HUMAN     | CIB1        | 22 kDa  | 3  | 8  | 6  | 7  | 5  | 6  | 10 | 11 | 9  | 9  | 8  | 9  |
| 367 | CD59 glycoprotein OS=Homo sapiens OX=9606 GN=CD59 PE=1 SV=1                                                             | CD59_HUMAN     | CD59        | 14 kDa  | 6  | 4  | 7  | 7  | 6  | 4  | 8  | 9  | 11 | 8  | 7  | 7  |
| 368 | Lymphocyte function-associated antigen 3 OS=Homo sapiens OX=9606 GN=CD58 PE=1 SV=1                                      | LFA3_HUMAN     | CD58        | 28 kDa  | 11 | 9  | 9  | 8  | 9  | 7  | 8  | 11 | 10 | 7  | 10 | 7  |
| 369 | Vasodilator-stimulated phosphoprotein OS=Homo sapiens OX=9606 GN=VASP PE=1 SV=3                                         | VASP_HUMAN     | VASP        | 40 kDa  | 6  | 6  | 7  | 7  | 8  | 7  | 10 | 8  | 7  | 6  | 4  | 7  |
| 370 | Extended synaptotagmin-1 OS=Homo sapiens OX=9606 GN=ESYT1 PE=1 SV=1                                                     | ESYT1_HUMAN    | ESYT1       | 123 kDa | 6  | 4  | 8  | 3  | 4  | 7  | 11 | 7  | 12 | 12 | 7  | 9  |
| 371 | Transmembrane emp24 domain-containing protein 2 OS=Homo sapiens OX=9606 GN=TMED2 PE=1 SV=1                              | TMED2_HUMAN    | TMED2       | 23 kDa  | 12 | 7  | 8  | 8  | 9  | 5  | 12 | 9  | 9  | 9  | 8  | 5  |
| 372 | 14-3-3 protein zeta/delta OS=Homo sapiens OX=9606 GN=YWHAZ PE=1 SV=1                                                    | YWHAZ_HUMAN    | 1433Z_HUMAN | 28 kDa  | 10 | 15 | 13 | 9  | 12 | 9  | 18 | 18 | 19 | 15 | 16 | 15 |
| 373 | MAGUK p55 subfamily member 6 OS=Homo sapiens OX=9606 GN=MPPE PE=1 SV=2                                                  | MPPE_HUMAN     | MPP6        | 61 kDa  | 6  | 3  | 4  | 6  | 3  | 3  | 11 | 9  | 5  | 7  | 5  | 8  |
| 374 | Serine/threonine-protein phosphatase 6 regulatory ankyrin repeat subunit A OS=Homo sapiens OX=9606 GN=ANKRD28 PE=1 SV=5 | ANKRD28_HUMAN  | ANKRD28     | 113 kDa | 8  | 6  | 8  | 8  | 9  | 12 | 3  | 8  | 0  | 4  | 6  | 7  |
| 375 | F-box only protein 7 OS=Homo sapiens OX=9606 GN=FBXO7 PE=1 SV=1                                                         | FBXO7_HUMAN    | FBXO7       | 59 kDa  | 6  | 5  | 5  | 0  | 7  | 7  | 10 | 7  | 6  | 4  | 4  | 4  |
| 376 | Large proline-rich protein BAG6 OS=Homo sapiens OX=9606 GN=BAG6 PE=1 SV=2                                               | BAG6_HUMAN     | BAG6        | 119 kDa | 6  | 10 | 10 | 18 | 15 | 15 | 0  | 0  | 0  | 0  | 2  | 0  |
| 377 | Chitinase domain-containing protein 1 OS=Homo sapiens OX=9606 GN=CHD1 PE=1 SV=1                                         | CHD1_HUMAN     | CHD1        | 45 kDa  | 2  | 7  | 5  | 7  | 3  | 4  | 9  | 7  | 9  | 6  | 6  | 9  |
| 378 | Phospholipid scramblase 1 OS=Homo sapiens OX=9606 GN=PLSCR1 PE=1 SV=1                                                   | PLSCR1_HUMAN   | PLSCR1      | 35 kDa  | 6  | 10 | 9  | 7  | 8  | 4  | 7  | 8  | 8  | 9  | 9  | 9  |
| 379 | Receptor expression-enhancing protein 5 OS=Homo sapiens OX=9606 GN=REEP5 PE=1 SV=3                                      | REEP5_HUMAN    | REEP5       | 21 kDa  | 9  | 8  | 9  | 8  | 7  | 8  | 7  | 10 | 8  | 10 | 4  | 5  |
| 380 | Peptidyl prolyl cis-trans isomerase NIMA-interacting 4 OS=Homo sapiens OX=9606 GN=PIN4 PE=1 SV=1                        | PIN4_HUMAN     | PIN4        | 14 kDa  | 9  | 7  | 8  | 11 | 7  | 11 | 3  | 6  | 6  | 6  | 3  | 6  |
| 381 | Galectin-9 OS=Homo sapiens OX=9606 GN=LGALS9 PE=1 SV=2                                                                  | LGALS9_HUMAN   | LGALS9      | 40 kDa  | 4  | 6  | 8  | 6  | 9  | 6  | 7  | 11 | 12 | 10 | 11 | 11 |
| 382 | Ubiquitin carboxyl-terminal hydrolase 5 OS=Homo sapiens OX=9606 GN=USP5 PE=1 SV=2                                       | USP5_HUMAN     | USP5        | 96 kDa  | 6  | 4  | 7  | 3  | 9  | 5  | 9  | 11 | 3  | 3  | 6  | 10 |
| 383 | Serine hydroxymethyltransferase, cytosolic OS=Homo sapiens OX=9606 GN=SHMT1 PE=1 SV=1                                   | SHMT1_HUMAN    | SHMT1       | 53 kDa  | 13 | 8  | 11 | 10 | 5  | 8  | 7  | 7  | 9  | 5  | 7  | 4  |
| 384 | Membrane-associated progesterone receptor component 2 OS=Homo sapiens OX=9606 GN=PGRM2 PE=1 SV=1                        | PGRM2_HUMAN    | PGRM2       | 24 kDa  | 5  | 7  | 9  | 6  | 8  | 5  | 8  | 11 | 9  | 8  | 7  | 8  |
| 385 | Vesicle transport protein SEC20 OS=Homo sapiens OX=9606 GN=BNIP1 PE=1 SV=3                                              | SEC20_HUMAN    | BNIP1       | 26 kDa  | 8  | 5  | 8  | 4  | 7  | 6  | 8  | 5  | 5  | 7  | 3  | 4  |
| 386 | Synaptosomal-associated protein 23 OS=Homo sapiens OX=9606 GN=SNAP23 PE=1 SV=1                                          | SNP23_HUMAN    | SNAP23      | 23 kDa  | 5  | 5  | 6  | 7  | 6  | 3  | 10 | 10 | 9  | 10 | 10 | 6  |
| 387 | Neuroblastoma-amplified sequence OS=Homo sapiens OX=9606 GN=NBAS PE=1 SV=2                                              | NBAS_HUMAN     | NBAS        | 269 kDa | 9  | 9  | 9  | 11 | 7  | 10 | 5  | 3  | 3  | 5  | 4  | 4  |
| 388 | Transmembrane and collagen-binding protein 2 OS=Homo sapiens OX=9606 GN=TM2C2 PE=1 SV=3                                 | TM2C2_HUMAN    | TM2C2       | 77 kDa  | 8  | 8  | 6  | 5  | 11 | 7  | 6  | 9  | 10 | 6  | 6  | 6  |
| 389 | Proliferation-associated protein 2G4 OS=Homo sapiens OX=9606 GN=PA2G4 PE=1 SV=3                                         | PA2G4_HUMAN    | PA2G4       | 44 kDa  | 4  | 4  | 7  | 10 | 14 | 8  | 3  | 4  | 3  | 3  | 2  | 7  |
| 390 | Interferon-induced protein with tetratricopeptide repeats 5 OS=Homo sapiens OX=9606 GN=IFIT5 PE=1 SV=1                  | IFIT5_HUMAN    | IFIT5       | 56 kDa  | 4  | 6  | 6  | 5  | 3  | 8  | 5  | 9  | 7  | 9  | 8  | 10 |
| 391 | Transmembrane 9 superfamily member 3 OS=Homo sapiens OX=9606 GN=TM9SF3 PE=1 SV=2                                        | TM9SF3_HUMAN   | TM9SF3      | 68 kDa  | 8  | 7  | 12 | 11 | 10 | 9  | 5  | 6  | 6  | 7  | 5  | 4  |
| 392 | Endoplasmic reticulum resident protein 29 OS=Homo sapiens OX=9606 GN=ERP29 PE=1 SV=4                                    | ERP29_HUMAN    | ERP29       | 29 kDa  | 4  | 5  | 5  | 4  | 4  | 5  | 12 | 9  | 12 | 8  | 10 | 7  |
| 393 | Metallo-beta-lactamase domain-containing protein 2 OS=Homo sapiens OX=9606 GN=MBLAC2 PE=1 SV=3                          | MBLAC2_HUMAN   | MBLAC2      | 31 kDa  | 6  | 7  | 7  | 6  | 7  | 5  | 9  | 7  | 11 | 8  | 9  | 9  |
| 394 | Protein lifeguard 3 OS=Homo sapiens OX=9606 GN=TM6IM1 PE=1 SV=2                                                         | TM6IM1_HUMAN   | LFG3        | 35 kDa  | 10 | 5  | 6  | 7  | 8  | 7  | 9  | 6  | 7  | 7  | 7  | 8  |
| 395 | Eukaryotic translation initiation factor 2 subunit 3 OS=Homo sapiens OX=9606 GN=EIF253 PE=1 SV=3                        | IF2G_HUMAN     | EIF253      | 51 kDa  | 5  | 7  | 8  | 8  | 8  | 8  | 7  | 8  | 4  | 5  | 9  | 9  |
| 396 | Obg-like ATPase 1 OS=Homo sapiens OX=9606 GN=OLA1 PE=1 SV=2                                                             | OLA1_HUMAN     | OLA1        | 45 kDa  | 6  | 8  | 5  | 3  | 6  | 5  | 3  | 3  | 5  | 0  | 0  | 4  |
| 397 | Eukaryotic translation initiation factor 2 subunit 1 OS=Homo sapiens OX=9606 GN=EIF251 PE=1 SV=3                        | IF2A_HUMAN     | EIF251      | 47 kDa  | 3  | 8  | 8  | 7  | 8  | 8  | 4  | 5  | 0  | 4  | 10 | 5  |
| 398 | Ras-related protein Ral-A OS=Homo sapiens OX=9606 GN=RALA PE=1 SV=1                                                     | RALA_HUMAN     | RALA        | 24 kDa  | 6  | 3  | 5  | 5  | 6  | 4  | 4  | 4  | 7  | 3  | 3  | 5  |
| 399 | Tyrosine-protein kinase SYK OS=Homo sapiens OX=9606 GN=SYK PE=1 SV=1                                                    | SYK_HUMAN      | SYK         | 72 kDa  | 4  | 3  | 5  | 5  | 4  | 5  | 2  | 6  | 6  | 10 | 6  | 8  |
| 400 | Myosin light polypeptide 6 OS=Homo sapiens OX=9606 GN=MYL6 PE=1 SV=2                                                    | MYL6_HUMAN     | MYL6        | 17 kDa  | 5  | 12 | 8  | 11 | 11 | 11 | 4  | 4  | 3  | 4  | 8  | 5  |
| 401 | Endoplasmic reticulum-Golgi intermediate compartment protein 1 OS=Homo sapiens OX=9606 GN=ERGIC1 PE=1 SV=1              | ERGIC1_HUMAN   | ERGIC1      | 33 kDa  | 5  | 5  | 7  | 7  | 6  | 5  | 9  | 0  | 6  | 4  | 5  | 6  |
| 402 | Multifunctional protein ADE2 OS=Homo sapiens OX=9606 GN=PAICS PE=1 SV=3                                                 | PUR6_HUMAN     | PAICS       | 47 kDa  | 3  | 0  | 2  | 2  | 2  | 6  | 11 | 7  | 4  | 5  | 6  | 12 |
| 403 | Thioredoxin-related transmembrane protein 4 OS=Homo sapiens OX=9606 GN=TMX4 PE=1 SV=1                                   | TMX4_HUMAN     | TMX4        | 39 kDa  | 3  | 7  | 7  | 0  | 6  | 6  | 10 | 10 | 11 | 7  | 8  | 7  |
| 404 | Programmed cell death protein 6 OS=Homo sapiens OX=9606 GN=PODC6 PE=1 SV=1                                              | PODC6_HUMAN    | PODC6       | 22 kDa  | 0  | 4  | 4  | 5  | 5  | 5  | 6  | 8  | 8  | 8  | 7  | 5  |
| 405 | Clastrin light chain A OS=Homo sapiens OX=9606 GN=CLTA PE=1 SV=1                                                        | CLTA_HUMAN     | CLTA        | 27 kDa  | 0  | 5  | 2  | 0  | 5  | 5  | 2  | 3  | 3  | 3  | 4  | 3  |
| 406 | Immunoglobulin heavy constant alpha 1 OS=Homo sapiens OX=9606 GN=IGHA1 PE=1 SV=2                                        | IGHA1_HUMAN    | IGHA1       | 38 kDa  | 9  | 8  | 6  | 4  | 7  | 5  | 7  | 4  | 7  | 4  | 12 | 7  |
| 407 | COP9 signalosome complex subunit 8 OS=Homo sapiens OX=9606 GN=COP8 PE=1 SV=1                                            | CSN8_HUMAN     | COP8        | 23 kDa  | 3  | 6  | 5  | 3  | 9  | 4  | 3  | 9  | 6  | 6  | 6  | 4  |
| 408 | Nuclear receptor-binding protein OS=Homo sapiens OX=9606 GN=NRBP1 PE=1 SV=1                                             | NRBP1_HUMAN    | NRBP1       | 60 kDa  | 5  | 8  | 5  | 5  | 7  | 6  | 0  | 7  | 2  | 4  | 5  | 3  |
| 409 | Ras-related protein Rab-5B OS=Homo sapiens OX=9606 GN=RAB5B PE=1 SV=1                                                   | RAB5B_HUMAN    | RAB5B       | 24 kDa  | 9  | 14 | 15 | 16 | 15 | 14 | 17 | 17 | 15 | 15 | 12 | 15 |
| 410 | 14-3-3 protein gamma OS=Homo sapiens OX=9606 GN=YWHAG PE=1 SV=2                                                         | YWHAG_HUMAN    | 1433G_HUMAN | 28 kDa  | 11 | 11 | 15 | 8  | 13 | 14 | 13 | 15 | 12 | 11 | 12 | 11 |
| 411 | Microtubule-associated protein RP/EB family member 1 OS=Homo sapiens OX=9606 GN=MAPRE1 PE=1 SV=3                        | MAPRE1_HUMAN   | MAPRE1      | 30 kDa  | 4  | 6  | 5  | 5  | 6  | 4  | 3  | 4  | 4  | 3  | 2  | 3  |
| 412 | Transmembrane emp24 domain-containing protein 9 OS=Homo sapiens OX=9606 GN=TMED9 PE=1 SV=2                              | TMED9_HUMAN    | TMED9       | 27 kDa  | 3  | 7  | 4  | 5  | 4  | 5  | 4  | 3  | 4  | 5  | 5  | 4  |
| 413 | ADP-ribosylation factor 6 OS=Homo sapiens OX=9606 GN=ARF6 PE=1 SV=2                                                     | ARF6_HUMAN     | ARF6        | 20 kDa  | 6  | 6  | 6  | 6  | 8  | 5  | 6  | 4  | 6  | 7  | 7  | 5  |
| 414 | Centromere/kinetochore protein zw10 homolog OS=Homo sapiens OX=9606 GN=ZW10 PE=1 SV=3                                   | ZW10_HUMAN     | ZW10        | 89 kDa  | 3  | 7  | 4  | 5  | 4  | 8  | 4  | 4  | 0  | 4  | 8  | 3  |
| 415 | Transmembrane protein 56 OS=Homo sapiens OX=9606 GN=TM56 PE=1 SV=1                                                      | TM56_HUMAN     | TM56        | 30 kDa  | 3  | 8  | 3  | 6  | 4  | 8  | 4  | 4  | 6  | 7  | 3  | 6  |
| 416 | Transmembrane channel-like protein 8 OS=Homo sapiens OX=9606 GN=TM2C8 PE=1 SV=1                                         | TM2C8_HUMAN    | TM2C8       | 82 kDa  | 5  | 3  | 8  | 6  | 4  | 6  | 7  | 5  | 4  | 5  | 6  | 5  |
| 417 | Retinoic acid receptor responder protein 2 OS=Homo sapiens OX=9606 GN=RARRS2 PE=1 SV=1                                  | RARRS2_HUMAN   | RARRS2      | 19 kDa  | 4  | 6  | 3  | 8  | 5  | 6  | 7  | 9  | 8  | 6  | 5  | 6  |
| 418 | Guanine nucleotide-binding protein subunit alpha-11 OS=Homo sapiens OX=9606 GN=GNA11 PE=1 SV=2                          | GNA11_HUMAN    | GNA11       | 42 kDa  | 7  | 8  | 8  | 9  | 10 | 13 | 10 | 12 | 14 | 9  | 14 | 15 |
| 419 | Nectin-1 OS=Homo sapiens OX=9606 GN=NECTIN1 PE=1 SV=3                                                                   | NECTIN1_HUMAN  | NECTIN1     | 57 kDa  | 5  | 3  | 2  | 3  | 3  | 3  | 8  | 8  | 6  | 9  | 11 | 10 |
| 420 | Serine/threonine-protein phosphatase 6 regulatory subunit 3 OS=Homo sapiens OX=9606 GN=PPP6R3 PE=1 SV=2                 | PPP6R3_HUMAN   | PPP6R3      | 98 kDa  | 4  | 8  | 0  | 0  | 4  | 6  | 6  | 5  | 10 | 3  | 4  | 6  |
| 421 | Atypical chemokine receptor 1 OS=Homo sapiens OX=9606 GN=ACKR1 PE=1 SV=3                                                | ACKR1_HUMAN    | ACKR1       | 36 kDa  | 0  | 0  | 0  | 0  | 0  | 0  | 0  | 0  | 0  | 7  | 0  | 0  |
| 422 | Purine nucleoside phosphorylase OS=Homo sapiens OX=9606 GN=PNP PE=1 SV=2                                                | PNP_HUMAN      | PNP         | 32 kDa  | 4  | 3  | 0  | 0  | 10 | 2  | 12 | 9  | 6  | 4  | 4  | 7  |
| 423 | Ras-related protein Rab-1A OS=Homo sapiens OX=9606 GN=RAB1A PE=1 SV=3                                                   | RAB1A_HUMAN    | RAB1A       | 23 kDa  | 8  | 10 | 11 | 15 | 11 | 12 | 9  | 12 | 9  | 9  | 14 | 6  |
| 424 | Adipocyte plasma membrane-associated protein OS=Homo sapiens OX=9606 GN=APMAP PE=1 SV=2                                 | APMAP_HUMAN    | APMAP       | 46 kDa  | 5  | 2  | 6  | 3  | 3  | 5  | 7  | 6  | 7  | 3  | 5  | 8  |
| 425 | Mannose 6-phospholch utilization defect 1 protein OS=Homo sapiens OX=9606 GN=MPDU1 PE=1 SV=2                            | MPDU1_HUMAN    | MPDU1       | 27 kDa  | 0  | 5  | 4  | 4  | 4  | 3  | 4  | 0  | 5  | 4  | 5  | 6  |
| 426 | 14-3-3 protein beta/alpha OS=Homo sapiens OX=9606 GN=YWHAB PE=1 SV=3                                                    | 1433B_HUMAN    | YWHAB       | 28 kDa  | 13 | 14 | 14 | 11 | 16 | 11 | 16 | 17 | 16 | 15 | 13 | 14 |
| 427 | ATP-binding cassette sub-family A member 7 OS=Homo sapiens OX=9606 GN=ABCA7 PE=1 SV=3                                   | ABCA7_HUMAN    | ABCA7       | 234 kDa | 4  | 3  | 2  | 2  | 2  | 3  | 12 | 4  | 10 | 7  | 6  | 10 |
| 428 | Protein-glutamine gamma-glutamyltransferase 2 OS=Homo sapiens OX=9606 GN=TGM2 PE=1 SV=2                                 | TGM2_HUMAN     | TGM2        | 77 kDa  | 3  | 3  | 2  | 2  | 9  | 5  | 8  | 6  | 5  | 2  | 3  | 7  |
| 429 | Keratin, type I cytoskeletal 14 OS=Homo sapiens OX=9606 GN=KRT14 PE=1 SV=4                                              | KRT14_HUMAN    | KRT14       | 52 kDa  | 5  | 5  | 5  | 4  | 5  | 4  | 9  | 9  | 0  | 7  | 6  | 5  |
| 430 | Actin-related protein 10 OS=Homo sapiens OX=9606 GN=ACTR10 PE=1 SV=1                                                    | ARP10_HUMAN    | ACTR10      | 46 kDa  | 4  | 5  | 4  | 7  | 4  | 5  | 5  | 5  | 4  | 6  | 5  | 4  |
| 431 | Tropomyosin alpha-1 chain OS=Homo sapiens OX=9606 GN=TPM1 PE=1 SV=2                                                     | TPM1_HUMAN     | TPM1        | 33 kDa  | 19 | 22 | 20 | 21 | 19 | 18 | 27 | 23 | 23 | 25 | 19 | 20 |
| 432 | Vesicle trafficking sorting-associated protein 45 OS=Homo sapiens OX=9606 GN=VPS45 PE=1 SV=1                            | VPS45_HUMAN    | VPS45       | 15 kDa  | 3  | 5  | 4  | 7  | 3  | 6  | 7  | 4  | 6  | 6  | 5  | 4  |
| 433 | Vesicle transport protein GOLTB8 OS=Homo sapiens OX=9606 GN=GOLTB8 PE=1 SV=1                                            | GOLTB8_HUMAN   | GOLTB8      | 35 kDa  | 5  | 5  | 8  | 5  | 7  | 3  | 4  | 6  | 6  | 7  | 6  | 6  |
| 434 | Lysophospholipid acyltransferase 2 OS=Homo sapiens OX=9606 GN=MBOT2 PE=2 SV=2                                           | MBOT2_HUMAN    | MBOT2       | 60 kDa  | 6  | 0  | 4  | 5  | 2  | 0  | 3  | 3  | 6  | 4  | 4  | 5  |
| 435 | Protein GUCD1 OS=Homo sapiens OX=9606 GN=GUCD1 PE=1 SV=2                                                                | GUCD1_HUMAN    | GUCD1       | 27 kDa  | 4  | 3  | 5  | 3  | 4  | 4  | 7  | 6  | 7  | 6  | 8  | 7  |
| 436 | Ras-related protein Rab-14 OS=Homo sapiens OX=9606 GN=RAB14 PE=1 SV=4                                                   | RAB14_HUMAN    | RAB14       | 24 kDa  | 11 | 7  | 9  | 11 | 11 | 11 | 7  | 0  | 4  | 4  | 6  | 3  |
| 437 | Casein kinase I isoform gamma-3 OS=Homo sapiens OX=9606 GN=CSNK1G3 PE=1 SV=2                                            | KC1G3_HUMAN    | CSNK1G3     | 51 kDa  | 3  | 3  | 5  | 0  | 0  | 2  | 6  | 4  | 3  | 5  | 4  | 2  |
| 438 | Guanine nucleotide-binding protein subunit beta-4 OS=Homo sapiens OX=9606 GN=GNB4 PE=1 SV=3                             | GNB4_HUMAN     | GNB4        | 38 kDa  | 21 | 14 | 18 | 19 | 20 | 15 | 16 | 18 | 17 | 20 | 22 | 21 |
| 439 | COP9 signalosome complex subunit 7a OS=Homo sapiens OX=9606 GN=COP7A PE=1 SV=1                                          | CSN7A_HUMAN    | COP7A       | 30 kDa  | 2  | 7  | 6  | 3  | 7  | 7  | 4  | 4  | 4  | 5  | 11 | 7  |
| 440 | COP9 signalosome complex subunit 7b OS=Homo sapiens OX=9606 GN=COP7B PE=1 SV=1                                          | CSN7B_HUMAN    | COP7B       | 30 kDa  | 4  | 5  | 8  | 7  | 4  | 5  | 3  | 6  | 4  | 4  | 0  | 5  |
| 441 | Ubiquitin-containing protein 1 OS=Homo sapiens OX=9606 GN=UBAC1 PE=1 SV=1                                               | UBAC1_HUMAN    | UBAC1       | 45 kDa  | 3  | 2  | 4  | 2  | 7  | 3  | 5  | 4  | 3  | 5  | 6  | 6  |
| 442 | Uncharacterized protein Clorf198 OS=Homo sapiens OX=9606 GN=Clorf198 PE=1 SV=1                                          | C1orf198_HUMAN | Clorf198    | 36 kDa  | 5  | 5  | 6  | 5  | 7  | 3  | 3  | 4  | 5  | 3  | 5  | 5  |
| 443 | Methanethiol oxidase OS=Homo sapiens OX=9606 GN=SELENBP1 PE=1 SV=2                                                      | SBP1_HUMAN     | SELENBP1    | 52 kDa  | 4  | 2  | 5  | 6  | 6  | 8  | 3  | 3  | 5  | 4  | 0  | 2  |
| 444 | Cullin-3 OS=Homo sapiens OX=9606 GN=CUL3 PE=1 SV=2                                                                      | CUL3_HUMAN     | CUL3        | 89 kDa  | 0  | 2  | 4  | 6  | 13 | 9  | 0  | 5  | 0  | 2  | 0  | 6  |
| 445 | Atlastin-2 OS=Homo sapiens OX=9606 GN=ATL2 PE=1 SV=2                                                                    | ATL2_HUMAN     | ATL2        | 66 kDa  | 6  | 7  | 7  | 10 | 6  | 6  | 6  | 4  | 4  | 5  | 3  | 8  |
| 446 | Ras-related protein Rap-1b OS=Homo sapiens                                                                              |                |             |         |    |    |    |    |    |    |    |    |    |    |    |    |



|     |                                                                                                                    |                |           |         |    |    |    |    |    |    |    |    |    |    |    |    |
|-----|--------------------------------------------------------------------------------------------------------------------|----------------|-----------|---------|----|----|----|----|----|----|----|----|----|----|----|----|
| 457 | CSC1-like protein 2 OS=Homo sapiens OX=9606 GN=TMEM63B PE=1 SV=1                                                   | CSC12_HUMAN    | TMEM63B   | 95 kDa  | 0  | 0  | 0  | 0  | 0  | 0  | 7  | 5  | 3  | 7  | 5  | 5  |
| 458 | F-actin-capping protein subunit alpha-2 OS=Homo sapiens OX=9606 GN=CAPZA2 PE=1 SV=3                                | CAPZA2_HUMAN   | CAPZA2    | 33 kDa  | 6  | 3  | 4  | 2  | 4  | 6  | 4  | 6  | 4  | 3  | 4  | 7  |
| 459 | Dynactin subunit 4 OS=Homo sapiens OX=9606 GN=DCTN4 PE=1 SV=1                                                      | DCTN4_HUMAN    | DCTN4     | 52 kDa  | 0  | 6  | 2  | 4  | 5  | 6  | 2  | 4  | 4  | 4  | 0  | 4  |
| 460 | Zinc finger ZZ-type and EF-hand domain-containing protein 1 OS=Homo sapiens OX=9606 GN=ZEF1 PE=1 SV=6              | ZEF1_HUMAN     | ZEF1      | 331 kDa | 0  | 7  | 4  | 3  | 6  | 7  | 0  | 4  | 2  | 0  | 2  | 2  |
| 461 | Phosphoribosyl pyrophosphate synthase-associated protein 1 OS=Homo sapiens OX=9606 GN=PPPSAP1 PE=1 SV=2            | PPPSAP1_HUMAN  | PPPSAP1   | 39 kDa  | 8  | 10 | 9  | 9  | 10 | 10 | 9  | 10 | 10 | 11 | 11 | 10 |
| 462 | Histone-arginine methyltransferase OX=Homo sapiens OX=9606 GN=PRPSAP1 PE=1 SV=3                                    | CARM1_HUMAN    | CARM1     | 66 kDa  | 0  | 6  | 0  | 0  | 5  | 4  | 0  | 4  | 0  | 0  | 6  | 3  |
| 463 | Catechol O-methyltransferase OS=Homo sapiens OX=9606 GN=COMT PE=1 SV=2                                             | COMT_HUMAN     | COMT      | 30 kDa  | 0  | 0  | 4  | 0  | 0  | 5  | 5  | 5  | 5  | 5  | 6  | 7  |
| 464 | MICAL-like protein 2 OS=Homo sapiens OX=9606 GN=MICAL2 PE=1 SV=1                                                   | MICAL2_HUMAN   | MICAL2    | 98 kDa  | 0  | 2  | 3  | 0  | 3  | 2  | 5  | 3  | 4  | 4  | 6  | 4  |
| 465 | Ras-related protein Rab-8B OS=Homo sapiens OX=9606 GN=RAB8B PE=1 SV=2                                              | RAB8B_HUMAN    | RAB8B     | 24 kDa  | 17 | 16 | 14 | 23 | 20 | 18 | 19 | 25 | 18 | 18 | 21 | 15 |
| 466 | Charged multivesicular body protein 6 OS=Homo sapiens OX=9606 GN=CHMP6 PE=1 SV=3                                   | CHMP6_HUMAN    | CHMP6     | 23 kDa  | 5  | 3  | 5  | 5  | 0  | 5  | 4  | 6  | 4  | 6  | 4  | 8  |
| 467 | E3 ubiquitin-protein ligase HECTD3 OS=Homo sapiens OX=9606 GN=HECTD3 PE=1 SV=1                                     | HECTD3_HUMAN   | HECTD3    | 97 kDa  | 4  | 6  | 8  | 6  | 6  | 11 | 2  | 3  | 0  | 2  | 6  | 4  |
| 468 | Epidermal growth factor receptor substrate 15 OS=Homo sapiens OX=9606 GN=EPS15 PE=1 SV=2                           | EPS15_HUMAN    | EPS15     | 99 kDa  | 0  | 6  | 5  | 0  | 4  | 2  | 4  | 7  | 0  | 0  | 4  | 6  |
| 469 | Fermitin family homolog 3 OS=Homo sapiens OX=9606 GN=FERMT3 PE=1 SV=1                                              | URP2_HUMAN     | FERMT3    | 76 kDa  | 3  | 3  | 5  | 2  | 7  | 5  | 0  | 2  | 0  | 0  | 4  | 0  |
| 470 | Carbonic anhydrase 2 OS=Homo sapiens OX=9606 GN=CA2 PE=1 SV=2                                                      | CA2_HUMAN      | CA2       | 29 kDa  | 2  | 5  | 4  | 0  | 0  | 4  | 6  | 5  | 6  | 3  | 2  | 2  |
| 471 | Golgin subfamily A member 7 OS=Homo sapiens OX=9606 GN=GGOLGA7 PE=1 SV=2                                           | GOLGA7_HUMAN   | GOLGA7    | 16 kDa  | 5  | 5  | 5  | 6  | 7  | 4  | 5  | 5  | 5  | 5  | 3  | 5  |
| 472 | UTP-glucose-1-phosphate uridylyltransferase OS=Homo sapiens OX=9606 GN=UGP2 PE=1 SV=5                              | UGP2_HUMAN     | UGP2      | 57 kDa  | 5  | 5  | 6  | 0  | 4  | 4  | 7  | 8  | 4  | 3  | 5  | 2  |
| 473 | Cytochrome b5 type 8 OS=Homo sapiens OX=9606 GN=CYB5B PE=1 SV=3                                                    | CYB5B_HUMAN    | CYB5B     | 17 kDa  | 5  | 0  | 3  | 5  | 3  | 0  | 6  | 5  | 7  | 6  | 3  | 7  |
| 474 | Glutathione peroxidase 1 OS=Homo sapiens OX=9606 GN=GPX1 PE=1 SV=4                                                 | GPX1_HUMAN     | GPX1      | 22 kDa  | 3  | 5  | 8  | 4  | 7  | 3  | 0  | 0  | 0  | 2  | 2  | 3  |
| 475 | Dehydrogenase/reductase SDR family member 7B OS=Homo sapiens OX=9606 GN=DHR57B PE=1 SV=2                           | DHR57B_HUMAN   | DHR57B    | 35 kDa  | 3  | 3  | 4  | 4  | 5  | 3  | 6  | 6  | 8  | 7  | 8  | 5  |
| 476 | Syntaxin-2 OS=Homo sapiens OX=9606 GN=STX2 PE=1 SV=3                                                               | STX2_HUMAN     | STX2      | 33 kDa  | 2  | 0  | 0  | 0  | 2  | 0  | 8  | 6  | 5  | 6  | 7  | 4  |
| 477 | Ubiquitin carboxyl-terminal hydrolase isozyme L5 OS=Homo sapiens OX=9606 GN=UCHL5 PE=1 SV=3                        | UCHL5_HUMAN    | UCHL5     | 38 kDa  | 3  | 3  | 0  | 0  | 3  | 0  | 4  | 7  | 3  | 6  | 8  | 4  |
| 478 | Disco-interacting protein 2 homolog 8 OS=Homo sapiens OX=9606 GN=DIP2B PE=1 SV=3                                   | DIP2B_HUMAN    | DIP2B     | 171 kDa | 6  | 4  | 2  | 0  | 3  | 0  | 4  | 3  | 0  | 4  | 2  | 0  |
| 479 | Small VCP/p97-interacting protein OS=Homo sapiens OX=9606 GN=SVIP PE=1 SV=1                                        | SVIP_HUMAN     | SVIP      | 8 kDa   | 5  | 5  | 5  | 6  | 5  | 3  | 6  | 6  | 5  | 6  | 5  | 6  |
| 480 | Thioredoxin-like protein 1 OS=Homo sapiens OX=9606 GN=TXNL1 PE=1 SV=3                                              | TXNL1_HUMAN    | TXNL1     | 32 kDa  | 0  | 6  | 4  | 0  | 4  | 4  | 3  | 4  | 4  | 4  | 4  | 0  |
| 481 | Ubiquitin-like modifier-activating enzyme 1 OS=Homo sapiens OX=9606 GN=UBA1 PE=1 SV=3                              | UBA1_HUMAN     | UBA1      | 118 kDa | 4  | 3  | 3  | 3  | 7  | 7  | 6  | 4  | 0  | 3  | 3  | 0  |
| 482 | Transmembrane protein 14C OS=Homo sapiens OX=9606 GN=TMEM14C PE=1 SV=1                                             | TMEM14C_HUMAN  | TMEM14C   | 12 kDa  | 0  | 4  | 0  | 4  | 0  | 3  | 5  | 4  | 5  | 4  | 5  | 4  |
| 483 | SUMO-conjugating enzyme UBC9 OS=Homo sapiens OX=9606 GN=UBE2I PE=1 SV=1                                            | UBE2I_HUMAN    | UBE2I     | 18 kDa  | 4  | 3  | 3  | 5  | 0  | 4  | 0  | 3  | 4  | 4  | 3  | 2  |
| 484 | Guanine nucleotide-binding protein G(I)/G(S)/G(O) subunit gamma-5 OS=Homo sapiens OX=9606 GN=GN5 PE=1 SV=3         | GN5_HUMAN      | GN5       | 7 kDa   | 4  | 3  | 3  | 4  | 5  | 5  | 5  | 5  | 5  | 2  | 3  | 5  |
| 485 | ER lumen protein-retaining receptor 1 OS=Homo sapiens OX=9606 GN=KDELR1 PE=1 SV=1                                  | ERD21_HUMAN    | KDELR1    | 25 kDa  | 6  | 5  | 6  | 6  | 8  | 6  | 7  | 0  | 0  | 4  | 4  | 6  |
| 486 | Sorting nexin-2 OS=Homo sapiens OX=9606 GN=SNX2 PE=1 SV=2                                                          | SNX2_HUMAN     | SNX2      | 58 kDa  | 0  | 5  | 3  | 4  | 3  | 5  | 2  | 4  | 5  | 7  | 6  | 5  |
| 487 | Clathrin light chain 8 OS=Homo sapiens OX=9606 GN=CLTB PE=1 SV=1                                                   | CLTB_HUMAN     | CLTB      | 25 kDa  | 0  | 5  | 0  | 2  | 4  | 2  | 0  | 3  | 3  | 3  | 3  | 2  |
| 488 | Phospholipid scramblase 4 OS=Homo sapiens OX=9606 GN=PLSCR4 PE=1 SV=2                                              | PLSCR4_HUMAN   | PLSCR4    | 37 kDa  | 5  | 6  | 3  | 5  | 3  | 4  | 5  | 5  | 9  | 7  | 4  | 5  |
| 489 | ADP-ribosylation factor 1 OS=Homo sapiens OX=9606 GN=ARF1 PE=1 SV=2                                                | ARF1_HUMAN     | ARF1      | 21 kDa  | 3  | 3  | 5  | 6  | 5  | 6  | 3  | 4  | 3  | 4  | 5  | 5  |
| 490 | V-type proton ATPase subunit c1 OS=Homo sapiens OX=9606 GN=ATP6V001 PE=1 SV=1                                      | VAGD1_HUMAN    | ATP6V001  | 40 kDa  | 0  | 3  | 6  | 2  | 3  | 3  | 5  | 5  | 6  | 7  | 6  | 6  |
| 491 | Rab3 GTPase-activating protein catalytic subunit OS=Homo sapiens OX=9606 GN=RAB3GAP1 PE=1 SV=3                     | RAB3GAP1_HUMAN | RAB3GAP1  | 111 kDa | 4  | 6  | 7  | 6  | 4  | 5  | 0  | 2  | 0  | 4  | 2  | 3  |
| 492 | Glycerophosphodiester phosphodiesterase 1 OS=Homo sapiens OX=9606 GN=GDE1 PE=1 SV=1                                | GDE1_HUMAN     | GDE1      | 38 kDa  | 0  | 5  | 5  | 5  | 3  | 4  | 3  | 4  | 4  | 4  | 4  | 3  |
| 493 | PRA1 family protein 3 OS=Homo sapiens OX=9606 GN=ARL6IP5 PE=1 SV=1                                                 | ARL6IP5_HUMAN  | ARL6IP5   | 22 kDa  | 0  | 5  | 5  | 5  | 4  | 4  | 4  | 4  | 4  | 4  | 0  | 4  |
| 494 | ADP-ribosyl cyclase/cyclic ADP-ribose hydrolase 1 OS=Homo sapiens OX=9606 GN=CD38 PE=1 SV=2                        | CD38_HUMAN     | CD38      | 34 kDa  | 0  | 2  | 0  | 0  | 0  | 2  | 0  | 0  | 3  | 4  | 3  | 3  |
| 495 | V-type proton ATPase subunit H OS=Homo sapiens OX=9606 GN=ATP6V1H PE=1 SV=1                                        | VATH_HUMAN     | ATP6V1H   | 56 kDa  | 4  | 0  | 3  | 0  | 7  | 2  | 3  | 5  | 0  | 0  | 0  | 0  |
| 496 | Serotransferrin OS=Homo sapiens OX=9606 GN=TF PE=1 SV=3                                                            | TRFE_HUMAN     | TF        | 47 kDa  | 0  | 0  | 5  | 4  | 4  | 4  | 7  | 3  | 3  | 0  | 3  | 3  |
| 497 | Selenocysteine-specific elongation factor OS=Homo sapiens OX=9606 GN=EFSEC PE=1 SV=4                               | SELB_HUMAN     | EFSEC     | 65 kDa  | 11 | 2  | 7  | 8  | 8  | 7  | 0  | 3  | 0  | 0  | 2  | 2  |
| 498 | UV excision repair protein RAD23 homolog A OS=Homo sapiens OX=9606 GN=RAD23A PE=1 SV=1                             | RAD23A_HUMAN   | RAD23A    | 40 kDa  | 3  | 3  | 3  | 0  | 6  | 3  | 7  | 6  | 0  | 2  | 2  | 3  |
| 499 | Cytochrome b reductase 1 OS=Homo sapiens OX=9606 GN=CYBRD1 PE=1 SV=1                                               | CYBRD1_HUMAN   | CYBRD1    | 32 kDa  | 4  | 0  | 0  | 0  | 0  | 0  | 6  | 0  | 0  | 0  | 4  | 0  |
| 500 | Rab GDP dissociation inhibitor beta OS=Homo sapiens OX=9606 GN=GDIB PE=1 SV=2                                      | GDIB_HUMAN     | GDIB      | 51 kDa  | 2  | 4  | 4  | 3  | 3  | 4  | 3  | 3  | 4  | 2  | 2  | 3  |
| 501 | GTPase HRas OS=Homo sapiens OX=9606 GN=HRAS PE=1 SV=1                                                              | RASH_HUMAN     | HRAS      | 21 kDa  | 28 | 26 | 31 | 28 | 30 | 23 | 0  | 30 | 32 | 30 | 26 | 32 |
| 502 | AMP deaminase 3 OS=Homo sapiens OX=9606 GN=AMPD3 PE=1 SV=1                                                         | AMPD3_HUMAN    | AMPD3     | 89 kDa  | 3  | 3  | 2  | 5  | 9  | 7  | 0  | 0  | 3  | 4  | 2  | 4  |
| 503 | Nucleobindin-2 OS=Homo sapiens OX=9606 GN=NUCB2 PE=1 SV=3                                                          | NUCB2_HUMAN    | NUCB2     | 50 kDa  | 6  | 4  | 5  | 3  | 2  | 3  | 3  | 0  | 2  | 2  | 0  | 0  |
| 504 | Importin subunit alpha-7 OS=Homo sapiens OX=9606 GN=KPNA6 PE=1 SV=1                                                | KPNA6_HUMAN    | KPNA6     | 60 kDa  | 3  | 3  | 3  | 2  | 3  | 2  | 2  | 6  | 2  | 3  | 4  | 6  |
| 505 | Aspartyl aminopeptidase OS=Homo sapiens OX=9606 GN=DNPEP PE=1 SV=1                                                 | DNPEP_HUMAN    | DNPEP     | 52 kDa  | 2  | 3  | 3  | 4  | 8  | 7  | 3  | 5  | 3  | 0  | 2  | 2  |
| 506 | Phosphatidylserine lipase ABHD16A OS=Homo sapiens OX=9606 GN=ABHD16A PE=1 SV=3                                     | ABHD16A_HUMAN  | ABHD16A   | 63 kDa  | 0  | 2  | 5  | 2  | 3  | 7  | 6  | 4  | 3  | 4  | 4  | 4  |
| 507 | Clusterin OS=Homo sapiens OX=9606 GN=CLU PE=1 SV=1                                                                 | CLUS_HUMAN     | CLUS      | 52 kDa  | 4  | 4  | 0  | 4  | 4  | 5  | 4  | 5  | 4  | 5  | 6  | 4  |
| 508 | Ras-related protein Rap-2a OS=Homo sapiens OX=9606 GN=RAP2A PE=1 SV=1                                              | RAP2A_HUMAN    | RAP2A     | 21 kDa  | 30 | 26 | 25 | 26 | 28 | 26 | 26 | 32 | 27 | 25 | 27 | 28 |
| 509 | Phospholipase D1 OS=Homo sapiens OX=9606 GN=PLD1 PE=1 SV=1                                                         | PLD1_HUMAN     | PLD1      | 124 kDa | 0  | 3  | 3  | 7  | 3  | 6  | 2  | 3  | 7  | 3  | 3  | 4  |
| 510 | Rab3 GTPase-activating protein non-catalytic subunit OS=Homo sapiens OX=9606 GN=RAB3GAP2 PE=1 SV=1                 | RAB3GAP2_HUMAN | RAB3GAP2  | 156 kDa | 3  | 0  | 3  | 2  | 5  | 8  | 4  | 3  | 3  | 2  | 2  | 3  |
| 511 | Dolichyl-diphosphooligosaccharide--protein glycosyltransferase subunit 1 OS=Homo sapiens OX=9606 GN=RPNI PE=1 SV=1 | RPNI_HUMAN     | RPNI      | 69 kDa  | 4  | 3  | 8  | 5  | 4  | 5  | 3  | 0  | 3  | 0  | 3  | 6  |
| 512 | Pyridoxal phosphate homeostasis protein OS=Homo sapiens OX=9606 GN=PLPBP PE=1 SV=1                                 | PLPBP_HUMAN    | PLPBP     | 30 kDa  | 0  | 3  | 5  | 4  | 5  | 6  | 0  | 2  | 8  | 5  | 2  | 9  |
| 513 | Ras-related protein Rab-5A OS=Homo sapiens OX=9606 GN=RAB5A PE=1 SV=2                                              | RAB5A_HUMAN    | RAB5A     | 24 kDa  | 13 | 10 | 13 | 12 | 10 | 11 | 12 | 13 | 8  | 12 | 10 | 11 |
| 514 | Very long-chain acyl-CoA synthetase OS=Homo sapiens OX=9606 GN=SLC27A2 PE=1 SV=2                                   | SLC27A2_HUMAN  | SLC27A2   | 70 kDa  | 3  | 3  | 5  | 0  | 2  | 2  | 5  | 4  | 5  | 5  | 6  | 4  |
| 515 | Adenylyl cyclase-associated protein 1 OS=Homo sapiens OX=9606 GN=CAP1 PE=1 SV=5                                    | CAP1_HUMAN     | CAP1      | 52 kDa  | 0  | 5  | 0  | 0  | 2  | 2  | 4  | 0  | 2  | 0  | 0  | 2  |
| 516 | Septin-2 OS=Homo sapiens OX=9606 GN=SEPT2 PE=1 SV=1                                                                | SEPT2_HUMAN    | SEPT2     | 44 kDa  | 2  | 6  | 6  | 5  | 6  | 5  | 3  | 6  | 3  | 6  | 6  | 4  |
| 517 | BAG family molecular chaperone regulator 2 OS=Homo sapiens OX=9606 GN=BAG2 PE=1 SV=1                               | BAG2_HUMAN     | BAG2      | 24 kDa  | 0  | 0  | 2  | 0  | 0  | 0  | 2  | 4  | 6  | 7  | 6  | 7  |
| 518 | Casein kinase II subunit alpha OS=Homo sapiens OX=9606 GN=CSNK2A1 PE=1 SV=1                                        | CSNK2A1_HUMAN  | CSNK2A1   | 45 kDa  | 0  | 0  | 0  | 0  | 2  | 0  | 0  | 0  | 5  | 4  | 0  | 0  |
| 519 | Sorting nexin-22 OS=Homo sapiens OX=9606 GN=SNX22 PE=1 SV=1                                                        | SNX22_HUMAN    | SNX22     | 22 kDa  | 0  | 3  | 0  | 0  | 3  | 2  | 0  | 0  | 0  | 0  | 4  | 0  |
| 520 | Hepatocyte growth factor-regulated tyrosine kinase substrate OS=Homo sapiens OX=9606 GN=HGS PE=1 SV=1              | HGS_HUMAN      | HGS       | 86 kDa  | 5  | 3  | 5  | 0  | 2  | 0  | 3  | 6  | 5  | 2  | 4  | 3  |
| 521 | Ras-related protein Rab-1B OS=Homo sapiens OX=9606 GN=RAB1B PE=1 SV=1                                              | RAB1B_HUMAN    | RAB1B     | 22 kDa  | 0  | 0  | 0  | 0  | 0  | 0  | 0  | 0  | 0  | 0  | 17 | 10 |
| 522 | Importin-9 OS=Homo sapiens OX=9606 GN=IPO9 PE=1 SV=3                                                               | IPO9_HUMAN     | IPO9      | 116 kDa | 2  | 3  | 5  | 3  | 4  | 4  | 0  | 5  | 4  | 0  | 2  | 0  |
| 523 | Serine/threonine-protein phosphatase 2A catalytic subunit beta isoform OS=Homo sapiens OX=9606 GN=PPP2CB PE=1 SV=1 | PPP2CB_HUMAN   | PPP2CB    | 36 kDa  | 0  | 0  | 0  | 0  | 5  | 6  | 3  | 4  | 0  | 0  | 3  | 4  |
| 524 | Tubulin alpha-1B chain OS=Homo sapiens OX=9606 GN=TUBA1B PE=1 SV=1                                                 | TUBA1B_HUMAN   | TUBA1B    | 50 kDa  | 6  | 6  | 6  | 7  | 6  | 0  | 0  | 0  | 0  | 0  | 0  | 0  |
| 525 | Retinol dehydrogenase 11 OS=Homo sapiens OX=9606 GN=RDH11 PE=1 SV=2                                                | RDH11_HUMAN    | RDH11     | 35 kDa  | 2  | 5  | 4  | 5  | 3  | 4  | 3  | 3  | 4  | 3  | 5  | 3  |
| 526 | O-phosphoserine tRNA[Sec] selenium transferase OS=Homo sapiens OX=9606 GN=SEPSCE5 PE=1 SV=2                        | SPCS_HUMAN     | SEPSCE5   | 56 kDa  | 0  | 8  | 5  | 6  | 6  | 4  | 0  | 2  | 2  | 3  | 4  | 7  |
| 527 | Eukaryotic translation initiation factor 5A-1 OS=Homo sapiens OX=9606 GN=EIF5A PE=1 SV=2                           | IF5A1_HUMAN    | EIF5A     | 17 kDa  | 0  | 0  | 4  | 0  | 3  | 5  | 0  | 5  | 6  | 7  | 2  | 0  |
| 528 | CAD protein OS=Homo sapiens OX=9606 GN=CAD PE=1 SV=3                                                               | PYR1_HUMAN     | CAD       | 243 kDa | 0  | 2  | 2  | 0  | 5  | 4  | 0  | 2  | 0  | 0  | 0  | 4  |
| 529 | Leucine-rich repeat-containing protein 59 OS=Homo sapiens OX=9606 GN=LRRCS9 PE=1 SV=1                              | LRRCS9_HUMAN   | LRRCS9    | 35 kDa  | 6  | 2  | 4  | 4  | 2  | 5  | 2  | 0  | 0  | 0  | 2  | 0  |
| 530 | Gamma-aminobutyric acid receptor-associated protein-like 1 OS=Homo sapiens OX=9606 GN=GABARAPL1 PE=1 SV=1          | GBRL1_HUMAN    | GABARAPL1 | 14 kDa  | 4  | 7  | 6  | 4  | 4  | 6  | 0  | 4  | 2  | 4  | 0  | 3  |
| 531 | GTP-binding protein 1 OS=Homo sapiens OX=9606 GN=GTPBP1 PE=1 SV=3                                                  | GTPBP1_HUMAN   | GTPBP1    | 72 kDa  | 0  | 3  | 3  | 5  | 4  | 7  | 2  | 0  | 0  | 2  | 2  | 5  |
| 532 | Protein kish-A OS=Homo sapiens OX=9606 GN=TMEM167A PE=1 SV=1                                                       | KISHA_HUMAN    | TMEM167A  | 8 kDa   | 0  | 6  | 0  | 0  | 0  | 0  | 5  | 4  | 0  | 0  | 0  | 0  |
| 533 | Cathepsin F OS=Homo sapiens OX=9606 GN=CTSF PE=1 SV=3                                                              | CTSF_HUMAN     | CTSF      | 43 kDa  | 0  | 2  | 0  | 0  | 5  | 3  | 2  | 3  | 2  | 3  | 2  | 3  |
| 534 | Oral homolog subfamily C member 5 OS=Homo sapiens OX=9606 GN=DNAC5 PE=1 SV=1                                       | DNAC5_HUMAN    | DNAC5     | 22 kDa  | 0  | 0  | 0  | 0  | 0  | 6  | 3  | 2  | 0  | 0  | 3  | 3  |
| 535 | Sarcoplasmic/endoplasmic reticulum calcium ATPase 2 OS=Homo sapiens OX=9606 GN=ATP2A2 PE=1 SV=1                    | AT2A2_HUMAN    | ATP2A2    | 115 kDa | 0  | 0  | 3  | 0  | 0  | 0  | 0  | 2  | 5  | 6  | 5  | 7  |
| 536 | Elongation factor 2 OS=Homo sapiens OX=9606 GN=EEF2 PE=1 SV=4                                                      | EEF2_HUMAN     | EEF2      | 95 kDa  | 0  | 0  | 2  | 6  | 8  | 6  | 0  | 0  | 0  | 0  | 2  | 3  |
| 537 | Signal transducing adapter molecule 1 OS=Homo sapiens OX=9606 GN=STAM PE=1 SV=3                                    | STAM1_HUMAN    | STAM      | 59 kDa  | 4  | 3  | 0  | 0  | 0  | 2  | 6  | 4  | 3  | 5  | 3  | 3  |
| 538 | Dynactin subunit 3 OS=Homo sapiens OX=9606 GN=DCTN3 PE=1 SV=1                                                      | DCTN3_HUMAN    | DCTN3     | 21 kDa  | 0  | 0  | 0  | 0  | 0  |    |    |    |    |    |    |    |



|     |                                                                |                 |                 |             |            |                |              |         |         |   |   |    |    |    |   |   |   |   |   |   |   |
|-----|----------------------------------------------------------------|-----------------|-----------------|-------------|------------|----------------|--------------|---------|---------|---|---|----|----|----|---|---|---|---|---|---|---|
| 549 | Hemoglobin subunit mu                                          | OS=Homo sapiens | OX-9606         | GN=HBM      | Pe=1 SV=1  | HBM_HUMAN      | HBM          | 16 kDa  | 0       | 0 | 7 | 5  | 9  | 10 | 0 | 0 | 0 | 0 | 0 | 0 |   |
| 550 | Sodium/potassium-transporting ATPase subunit beta-3            | OS=Homo sapiens | OX-9606         | GN=ATP1B3   | Pe=1 SV=1  | AT1B3_HUMAN    | ATP1B3       | 32 kDa  | 4       | 5 | 2 | 3  | 6  | 0  | 4 | 0 | 0 | 2 | 0 | 0 |   |
| 551 | Porphobilinogen deaminase                                      | OS=Homo sapiens | OX-9606         | GN=HMB5     | Pe=1 SV=2  | HMB5           | HMB5         | 39 kDa  | 0       | 2 | 2 | 2  | 2  | 4  | 0 | 0 | 2 | 0 | 4 | 5 |   |
| 552 | Apolipoprotein A-I                                             | OS=Homo sapiens | OX-9606         | GN=APOA1    | Pe=1 SV=1  | APOA1_HUMAN    | APOA1        | 31 kDa  | 3       | 4 | 2 | 4  | 2  | 4  | 3 | 4 | 3 | 3 | 3 | 2 |   |
| 553 | CD2-associated protein                                         | OS=Homo sapiens | OX-9606         | GN=CD2AP    | Pe=1 SV=1  | CD2AP_HUMAN    | CD2AP        | 71 kDa  | 2       | 4 | 0 | 5  | 4  | 0  | 0 | 3 | 0 | 0 | 2 | 2 |   |
| 554 | CD99 antigen                                                   | OS=Homo sapiens | OX-9606         | GN=CD99     | Pe=1 SV=1  | CD99_HUMAN     | CD99         | 43 kDa  | 4       | 4 | 3 | 0  | 5  | 3  | 4 | 3 | 4 | 4 | 4 | 0 |   |
| 555 | Choline transporter-like protein 1                             | OS=Homo sapiens | OX-9606         | GN=SLC44A1  | Pe=1 SV=1  | SLC44A1_HUMAN  | SLC44A1      | 73 kDa  | 2       | 6 | 0 | 2  | 2  | 0  | 0 | 3 | 4 | 2 | 0 | 0 |   |
| 556 | Glucose-6-phosphate exchanger                                  | SLC37A4         | OS=Homo sapiens | OX-9606     | GN=SLC37A4 | Pe=1 SV=1      | GL6PT1_HUMAN | GL6PT1  | 46 kDa  | 0 | 3 | 3  | 0  | 0  | 0 | 4 | 2 | 6 | 4 | 5 |   |
| 557 | PITH domain-containing protein 1                               | OS=Homo sapiens | OX-9606         | GN=PITHD1   | Pe=1 SV=1  | PITH1_HUMAN    | PITHD1       | 24 kDa  | 3       | 0 | 2 | 3  | 4  | 3  | 0 | 2 | 0 | 0 | 0 | 0 |   |
| 558 | Zinc finger CCHC-type antiviral protein 1                      | OS=Homo sapiens | OX-9606         | GN=ZC3HAV1  | Pe=1 SV=3  | ZC3HAV1_HUMAN  | ZC3HAV1      | 101 kDa | 3       | 0 | 3 | 5  | 5  | 4  | 3 | 0 | 2 | 0 | 2 | 0 |   |
| 559 | Tubulin beta-4B chain                                          | OS=Homo sapiens | OX-9606         | GN=TUBB4B   | Pe=1 SV=1  | TUBB4B_HUMAN   | TUBB4B       | 50 kDa  | 2       | 0 | 6 | 7  | 4  | 13 | 0 | 0 | 0 | 0 | 0 | 0 |   |
| 560 | Eukaryotic translation initiation factor 4 gamma               | 1               | OS=Homo sapiens | OX-9606     | GN=EIF4G1  | Pe=1 SV=4      | IF4G1_HUMAN  | EIF4G1  | 175 kDa | 0 | 2 | 3  | 3  | 6  | 3 | 0 | 4 | 0 | 2 | 3 |   |
| 561 | Peroxiredoxin-4                                                | OS=Homo sapiens | OX-9606         | GN=PRDX4    | Pe=1 SV=1  | PRDX4_HUMAN    | PRDX4        | 31 kDa  | 0       | 3 | 5 | 0  | 0  | 0  | 6 | 0 | 6 | 4 | 4 | 3 |   |
| 562 | Serpin H1                                                      | OS=Homo sapiens | OX-9606         | GN=SERPINH1 | Pe=1 SV=2  | SERP_H1_HUMAN  | SERP_H1      | 46 kDa  | 3       | 3 | 3 | 4  | 3  | 3  | 4 | 2 | 2 | 4 | 3 | 4 |   |
| 563 | Mannosyl-oligosaccharide glucosidase                           | OS=Homo sapiens | OX-9606         | GN=MOGS     | Pe=1 SV=5  | MOGS_HUMAN     | MOGS         | 92 kDa  | 2       | 0 | 0 | 0  | 2  | 0  | 3 | 4 | 0 | 4 | 2 | 5 |   |
| 564 | Importin subunit alpha-1                                       | OS=Homo sapiens | OX-9606         | GN=KPNAB    | Pe=1 SV=1  | KPNAB_HUMAN    | KPNAB        | 58 kDa  | 0       | 3 | 3 | 5  | 5  | 5  | 3 | 5 | 3 | 0 | 4 | 3 |   |
| 565 | Serine/threonine-protein kinase                                | STK11           | OS=Homo sapiens | OX-9606     | GN=STK11   | Pe=1 SV=1      | STK11_HUMAN  | STK11   | 49 kDa  | 0 | 5 | 0  | 0  | 0  | 0 | 7 | 4 | 3 | 4 | 6 |   |
| 566 | MAGUK p55 subfamily member 7                                   | OS=Homo sapiens | OX-9606         | GN=MPP7     | Pe=1 SV=1  | MPP7_HUMAN     | MPP7         | 66 kDa  | 2       | 0 | 0 | 0  | 0  | 0  | 6 | 5 | 2 | 3 | 0 | 2 |   |
| 567 | Protein RER1                                                   | OS=Homo sapiens | OX-9606         | GN=RER1     | Pe=1 SV=1  | RER1_HUMAN     | RER1         | 23 kDa  | 3       | 4 | 4 | 2  | 3  | 0  | 0 | 0 | 2 | 4 | 3 | 2 |   |
| 568 | Peroxiredoxin-6                                                | OS=Homo sapiens | OX-9606         | GN=PRDX6    | Pe=1 SV=3  | PRDX6_HUMAN    | PRDX6        | 25 kDa  | 0       | 0 | 0 | 0  | 0  | 0  | 2 | 4 | 4 | 3 | 2 | 0 |   |
| 569 | TSC22 domain family protein 4                                  | OS=Homo sapiens | OX-9606         | GN=TSC22D4  | Pe=1 SV=2  | TSC22D4_HUMAN  | TSC22D4      | 41 kDa  | 0       | 8 | 0 | 4  | 6  | 3  | 0 | 5 | 0 | 3 | 4 | 0 |   |
| 570 | Vacuolar protein-sorting-associated protein 25                 | OS=Homo sapiens | OX-9606         | GN=VP525    | Pe=1 SV=1  | VP525_HUMAN    | VP525        | 21 kDa  | 0       | 3 | 0 | 0  | 0  | 2  | 0 | 4 | 3 | 3 | 3 | 3 |   |
| 571 | 1-acyl-sn-glycerol-3-phosphate acyltransferase alpha           | OS=Homo sapiens | OX-9606         | GN=AGPAT1   | Pe=1 SV=2  | PLCA_HUMAN     | AGPAT1       | 32 kDa  | 0       | 3 | 0 | 0  | 0  | 2  | 0 | 0 | 0 | 0 | 0 | 0 |   |
| 572 | Endoplasmic reticulum-Golgi intermediate compartment protein 2 | OS=Homo sapiens | OX-9606         | GN=ERGIC2   | Pe=1 SV=2  | ERG2_HUMAN     | ERG2         | 43 kDa  | 5       | 0 | 3 | 2  | 0  | 0  | 3 | 4 | 0 | 3 | 4 | 0 |   |
| 573 | Dolichyl-diphosphoglycosyltransferase                          | subunit 2       | OS=Homo sapiens | OX-9606     | GN=RPK2    | Pe=1 SV=3      | RPK2_HUMAN   | RPK2    | 69 kDa  | 0 | 0 | 0  | 3  | 0  | 0 | 2 | 4 | 5 | 5 | 3 |   |
| 574 | Neuroglialin                                                   | OS=Homo sapiens | OX-9606         | GN=NPTN     | Pe=1 SV=2  | NPTN_HUMAN     | NPTN         | 44 kDa  | 0       | 0 | 0 | 0  | 0  | 0  | 6 | 0 | 3 | 0 | 0 | 4 |   |
| 575 | EH domain-containing protein 1                                 | OS=Homo sapiens | OX-9606         | GN=EHD1     | Pe=1 SV=2  | EHD1_HUMAN     | EHD1         | 61 kDa  | 0       | 2 | 4 | 2  | 3  | 0  | 0 | 0 | 0 | 2 | 3 | 2 |   |
| 576 | Protein-L-isoaspartate(D-aspartate) O-methyltransferase        | OS=Homo sapiens | OX-9606         | GN=PCMT1    | Pe=1 SV=4  | PCMT1_HUMAN    | PCMT1        | 25 kDa  | 0       | 3 | 4 | 4  | 3  | 3  | 3 | 3 | 2 | 5 | 2 | 4 |   |
| 577 | Transcription elongation factor A protein 1                    | OS=Homo sapiens | OX-9606         | GN=TCEA1    | Pe=1 SV=2  | TCEA1_HUMAN    | TCEA1        | 34 kDa  | 0       | 0 | 2 | 2  | 3  | 0  | 0 | 4 | 5 | 7 | 4 | 4 |   |
| 578 | Y-box-binding protein 3                                        | OS=Homo sapiens | OX-9606         | GN=YBX3     | Pe=1 SV=4  | YBX3_HUMAN     | YBX3         | 40 kDa  | 0       | 0 | 0 | 2  | 4  | 0  | 4 | 3 | 0 | 0 | 4 | 2 |   |
| 579 | Lysophospholipid acyltransferase 5                             | OS=Homo sapiens | OX-9606         | GN=LPCAT3   | Pe=1 SV=1  | LPCAT3_HUMAN   | LPCAT3       | 56 kDa  | 0       | 2 | 2 | 0  | 0  | 0  | 2 | 3 | 0 | 5 | 0 | 3 |   |
| 580 | Phosphatidylinositol 3,4,5-trisphosphate 5-phosphatase 1       | OS=Homo sapiens | OX-9606         | GN=INPP5D   | Pe=1 SV=2  | SHIP1_HUMAN    | INPP5D       | 133 kDa | 4       | 2 | 0 | 2  | 4  | 2  | 4 | 0 | 0 | 2 | 3 | 5 |   |
| 581 | Charged multivesicular body protein 1b                         | OS=Homo sapiens | OX-9606         | GN=CHMP1B   | Pe=1 SV=1  | CHMP1B_HUMAN   | CHMP1B       | 22 kDa  | 0       | 2 | 0 | 4  | 2  | 0  | 3 | 4 | 0 | 0 | 3 | 2 |   |
| 582 | Endoplasmic reticulum protein lunsapark                        | OS=Homo sapiens | OX-9606         | GN=LNPK     | Pe=1 SV=2  | LNPK_HUMAN     | LNPK         | 44 kDa  | 0       | 0 | 4 | 0  | 0  | 0  | 4 | 3 | 3 | 0 | 0 | 4 |   |
| 583 | C-C motif chemokine 14                                         | OS=Homo sapiens | OX-9606         | GN=CCL14    | Pe=1 SV=1  | CCL14_HUMAN    | CCL14        | 11 kDa  | 5       | 0 | 0 | 5  | 0  | 2  | 0 | 4 | 0 | 0 | 0 | 0 |   |
| 584 | Cysteine-rich and transmembrane domain-containing protein 1    | OS=Homo sapiens | OX-9606         | GN=CYSTM1   | Pe=1 SV=1  | CYTM1_HUMAN    | CYSTM1       | 11 kDa  | 0       | 0 | 0 | 0  | 0  | 0  | 4 | 4 | 0 | 0 | 0 | 0 |   |
| 585 | Kinesin-1 heavy chain                                          | OS=Homo sapiens | OX-9606         | GN=KIF5B    | Pe=1 SV=1  | KIF5B_HUMAN    | KIF5B        | 110 kDa | 0       | 0 | 0 | 0  | 4  | 0  | 0 | 0 | 0 | 0 | 0 | 0 |   |
| 586 | Heterogeneous nuclear ribonucleoprotein Q                      | OS=Homo sapiens | OX-9606         | GN=SYNCRIP  | Pe=1 SV=2  | HNRQP_Q_HUMAN  | SYNCRIP      | 70 kDa  | 2       | 4 | 4 | 0  | 5  | 3  | 0 | 4 | 0 | 0 | 3 | 3 |   |
| 587 | 60S acidic ribosomal protein P2                                | OS=Homo sapiens | OX-9606         | GN=RPLP2    | Pe=1 SV=1  | RPLP2_HUMAN    | RPLP2        | 12 kDa  | 0       | 5 | 5 | 4  | 6  | 3  | 0 | 0 | 2 | 3 | 2 | 5 |   |
| 588 | Gephyrin                                                       | OS=Homo sapiens | OX-9606         | GN=GPHN     | Pe=1 SV=1  | GEPH_HUMAN     | GPHN         | 80 kDa  | 0       | 0 | 2 | 4  | 5  | 0  | 0 | 3 | 3 | 0 | 4 | 3 |   |
| 589 | DnaI homolog subfamily B member 2                              | OS=Homo sapiens | OX-9606         | GN=DNABJ2   | Pe=1 SV=3  | DNABJ2_HUMAN   | DNABJ2       | 36 kDa  | 0       | 0 | 0 | 0  | 2  | 6  | 3 | 0 | 0 | 2 | 3 | 9 |   |
| 590 | Ran-binding protein 10                                         | OS=Homo sapiens | OX-9606         | GN=RBNP10   | Pe=1 SV=1  | RBNP10_HUMAN   | RBNP10       | 67 kDa  | 0       | 4 | 0 | 3  | 0  | 0  | 3 | 2 | 0 | 2 | 0 | 3 |   |
| 591 | Bleomycin hydrolase                                            | OS=Homo sapiens | OX-9606         | GN=BLMH     | Pe=1 SV=1  | BLMH_HUMAN     | BLMH         | 53 kDa  | 0       | 3 | 3 | 0  | 2  | 0  | 4 | 2 | 0 | 0 | 3 | 0 |   |
| 592 | Major facilitator superfamily domain-containing protein 28     | OS=Homo sapiens | OX-9606         | GN=MFS028   | Pe=1 SV=1  | MFS028_HUMAN   | MFS028       | 54 kDa  | 0       | 0 | 0 | 0  | 0  | 3  | 3 | 5 | 3 | 5 | 0 | 0 |   |
| 593 | Protein disulfide-isomerase A4                                 | OS=Homo sapiens | OX-9606         | GN=PDIA4    | Pe=1 SV=2  | PDIA4_HUMAN    | PDIA4        | 73 kDa  | 0       | 2 | 0 | 0  | 0  | 0  | 5 | 0 | 3 | 0 | 2 | 2 |   |
| 594 | Copper-transporting ATPase 2                                   | OS=Homo sapiens | OX-9606         | GN=ATP7B    | Pe=1 SV=4  | ATP7B_HUMAN    | ATP7B        | 157 kDa | 0       | 2 | 2 | 0  | 2  | 0  | 0 | 0 | 0 | 3 | 6 | 4 |   |
| 595 | Transmembrane 9 superfamily member 2                           | OS=Homo sapiens | OX-9606         | GN=TM9SF2   | Pe=1 SV=1  | TM9SF2_HUMAN   | TM9SF2       | 76 kDa  | 3       | 0 | 0 | 0  | 3  | 2  | 0 | 2 | 2 | 3 | 0 | 0 |   |
| 596 | High affinity cationic amino acid transporter 1                | OS=Homo sapiens | OX-9606         | GN=SLC7A1   | Pe=1 SV=1  | CTR1_HUMAN     | SLC7A1       | 68 kDa  | 0       | 0 | 0 | 0  | 2  | 3  | 3 | 2 | 4 | 2 | 2 | 3 |   |
| 597 | Proteolipid protein 2                                          | OS=Homo sapiens | OX-9606         | GN=PLP2     | Pe=1 SV=1  | PLP2_HUMAN     | PLP2         | 17 kDa  | 3       | 3 | 4 | 4  | 3  | 4  | 3 | 4 | 2 | 0 | 5 | 3 |   |
| 598 | Proteasome assembly chaperone 1                                | OS=Homo sapiens | OX-9606         | GN=PSMG1    | Pe=1 SV=1  | PSMG1_HUMAN    | PSMG1        | 33 kDa  | 0       | 4 | 2 | 0  | 4  | 2  | 0 | 0 | 0 | 0 | 0 | 3 |   |
| 599 | NF3-like protein 1                                             | OS=Homo sapiens | OX-9606         | GN=NFL1     | Pe=1 SV=2  | NFL1_HUMAN     | NFL1         | 42 kDa  | 0       | 3 | 0 | 0  | 3  | 0  | 3 | 2 | 0 | 0 | 0 | 0 |   |
| 600 | Transmembrane emp24 domain-containing protein 1                | OS=Homo sapiens | OX-9606         | GN=TMED1    | Pe=1 SV=1  | TMED1_HUMAN    | TMED1        | 25 kDa  | 4       | 2 | 4 | 2  | 3  | 3  | 4 | 2 | 0 | 0 | 0 | 0 |   |
| 601 | Beta-2-microglobulin                                           | OS=Homo sapiens | OX-9606         | GN=B2M      | Pe=1 SV=1  | B2M_HUMAN      | B2M          | 14 kDa  | 0       | 0 | 0 | 0  | 0  | 0  | 6 | 4 | 4 | 4 | 5 | 8 |   |
| 602 | DNA-dependent protein kinase catalytic subunit                 | OS=Homo sapiens | OX-9606         | GN=PRKDC    | Pe=1 SV=3  | PRKDC_HUMAN    | PRKDC        | 469 kDa | 0       | 0 | 5 | 3  | 6  | 4  | 0 | 0 | 0 | 0 | 0 | 0 |   |
| 603 | Ubiquitin-fold modifier 1                                      | OS=Homo sapiens | OX-9606         | GN=UFM1     | Pe=1 SV=1  | UFM1_HUMAN     | UFM1         | 9 kDa   | 2       | 0 | 0 | 0  | 3  | 3  | 3 | 2 | 0 | 3 | 3 | 2 |   |
| 604 | Beta-arrestin-2                                                | OS=Homo sapiens | OX-9606         | GN=ARRB2    | Pe=1 SV=2  | ARRB2_HUMAN    | ARRB2        | 46 kDa  | 0       | 0 | 2 | 0  | 0  | 0  | 0 | 0 | 3 | 0 | 0 | 3 |   |
| 605 | Proteasome inhibitor P131 subunit                              | OS=Homo sapiens | OX-9606         | GN=PSMF1    | Pe=1 SV=2  | PSMF1_HUMAN    | PSMF1        | 30 kDa  | 0       | 2 | 0 | 0  | 2  | 2  | 0 | 3 | 0 | 0 | 0 | 0 |   |
| 606 | Synaptogyrin-2                                                 | OS=Homo sapiens | OX-9606         | GN=SYNGR2   | Pe=1 SV=1  | SYNGR2_HUMAN   | SYNGR2       | 25 kDa  | 0       | 0 | 0 | 0  | 2  | 3  | 0 | 0 | 0 | 0 | 0 | 0 |   |
| 607 | 60S ribosomal protein L18                                      | OS=Homo sapiens | OX-9606         | GN=RLP18    | Pe=1 SV=2  | RLP18_HUMAN    | RLP18        | 22 kDa  | 0       | 3 | 2 | 0  | 3  | 3  | 0 | 0 | 0 | 0 | 0 | 0 |   |
| 608 | Long-chain fatty acid-CoA ligase 5                             | OS=Homo sapiens | OX-9606         | GN=ACSL5    | Pe=1 SV=1  | ACSL5_HUMAN    | ACSL5        | 76 kDa  | 0       | 5 | 6 | 0  | 0  | 0  | 6 | 0 | 3 | 0 | 6 | 0 |   |
| 609 | C-C chemokine receptor-like 2                                  | OS=Homo sapiens | OX-9606         | GN=CCRL2    | Pe=1 SV=2  | CCRL2_HUMAN    | CCRL2        | 40 kDa  | 0       | 0 | 0 | 0  | 0  | 0  | 0 | 0 | 2 | 0 | 4 | 0 |   |
| 610 | Ras-related protein Rab-2A                                     | OS=Homo sapiens | OX-9606         | GN=RAB2A    | Pe=1 SV=1  | RAB2A_HUMAN    | RAB2A        | 24 kDa  | 0       | 8 | 8 | 10 | 0  | 12 | 0 | 0 | 0 | 0 | 0 | 0 |   |
| 611 | Serine-tRNA ligase, cytoplasmic                                | OS=Homo sapiens | OX-9606         | GN=SARS     | Pe=1 SV=3  | SYSC_HUMAN     | SARS         | 59 kDa  | 0       | 0 | 3 | 4  | 10 | 2  | 0 | 0 | 0 | 0 | 0 | 0 |   |
| 612 | Epidermal growth factor receptor substrate 15-like 1           | OS=Homo sapiens | OX-9606         | GN=EPS15L1  | Pe=1 SV=1  | EPS15L1_HUMAN  | EPS15L1      | 94 kDa  | 0       | 0 | 2 | 2  | 0  | 2  | 0 | 2 | 3 | 0 | 4 | 2 |   |
| 613 | CDP-diacylglycerol-inositol 3-phosphatidyltransferase          | OS=Homo sapiens | OX-9606         | GN=CDIPT    | Pe=1 SV=1  | CDIPT_HUMAN    | CDIPT        | 24 kDa  | 3       | 0 | 0 | 2  | 0  | 0  | 0 | 4 | 4 | 3 | 3 | 4 |   |
| 614 | Synaptophysin-like protein 1                                   | OS=Homo sapiens | OX-9606         | GN=SYPL1    | Pe=1 SV=1  | SYPL1_HUMAN    | SYPL1        | 29 kDa  | 2       | 0 | 3 | 0  | 3  | 4  | 0 | 0 | 0 | 0 | 2 | 0 |   |
| 615 | Myeloid-associated differentiation marker                      | OS=Homo sapiens | OX-9606         | GN=MYADM    | Pe=1 SV=2  | MYADM_HUMAN    | MYADM        | 35 kDa  | 0       | 0 | 0 | 0  | 0  | 0  | 3 | 0 | 0 | 0 | 4 | 0 |   |
| 616 | Immunoglobulin kappa variable 3-20                             | OS=Homo sapiens | OX-9606         | GN=IGHV3-20 | Pe=1 SV=2  | IGHV3-20_HUMAN | IGHV3-20     | 13 kDa  | 0       | 0 | 0 | 0  | 0  | 0  | 4 | 0 | 0 | 0 | 4 | 0 |   |
| 617 | Glucose-induced degradation protein 8                          | homolog         | OS=Homo sapiens | OX-9606     | GN=GI08    | Pe=1 SV=1      | GI08_HUMAN   | GI08    | 7 kDa   | 0 | 2 | 3  | 0  | 4  | 5 | 3 | 0 | 0 | 4 | 0 | 0 |
| 618 | Oxysterol-binding protein-related protein 8                    | OS=Homo sapiens | OX-9606         | GN=OSBP8    | Pe=1 SV=3  | OSBP8_HUMAN    | OSBP8        | 101 kDa | 0       | 0 | 0 | 0  | 0  | 0  | 7 | 5 | 5 | 3 | 3 | 2 |   |
| 619 | Unconventional myosin-ic                                       | OS=Homo sapiens | OX-9606         | GN=MYO1C    | Pe=1 SV=4  | MYO1C_HUMAN    | MYO1C        | 122 kDa | 0       | 0 | 0 | 0  | 0  | 2  | 2 | 0 | 0 | 5 | 0 | 2 |   |
| 620 | Palmitoyltransferase ZDHHC20                                   | OS=Homo sapiens | OX-9606         | GN=ZDHHC20  | Pe=1 SV=1  | ZDHHC20_HUMAN  | ZDHHC20      | 42 kDa  | 0       | 0 | 0 | 3  | 0  | 0  | 0 | 0 | 4 | 0 | 0 | 0 |   |
| 621 | Alpha-synuclein                                                | OS=Homo sapiens | OX-9606         | GN=SNCA     | Pe=1 SV=1  | SNCA_HUMAN     | SNCA         | 14 kDa  | 2       | 3 | 2 | 0  | 3  | 0  | 3 |   |   |   |   |   |   |



|     |                                                                                                              |                 |          |         |   |   |   |   |   |   |    |    |   |   |   |    |
|-----|--------------------------------------------------------------------------------------------------------------|-----------------|----------|---------|---|---|---|---|---|---|----|----|---|---|---|----|
| 641 | Adenosylhomocysteinase OS=Homo sapiens OX=9606 GN=AHCY PE=1 SV=4                                             | SAHH_HUMAN      | AHCY     | 48 kDa  | 2 | 3 | 0 | 0 | 4 | 0 | 4  | 5  | 0 | 0 | 0 | 0  |
| 642 | Dolichylidiphosphatase 1 OS=Homo sapiens OX=9606 GN=DOLPP1 PE=2 SV=1                                         | DOPP1_HUMAN     | DOLPP1   | 27 kDa  | 0 | 0 | 0 | 0 | 2 | 0 | 2  | 0  | 0 | 0 | 0 | 3  |
| 643 | Protein PRRC1 OS=Homo sapiens OX=9606 GN=PRRC1 PE=1 SV=1                                                     | PRRC1_HUMAN     | PRRC1    | 47 kDa  | 0 | 0 | 0 | 4 | 0 | 3 | 0  | 0  | 0 | 0 | 0 | 2  |
| 644 | N-acyl-phosphatidylethanolamine-hydrolyzing phospholipase D OS=Homo sapiens OX=9606 GN=NAPEPLD PE=1 SV=2     | NAPEPLD_HUMAN   | NAPEPLD  | 46 kDa  | 0 | 3 | 4 | 4 | 0 | 2 | 0  | 0  | 2 | 0 | 0 | 0  |
| 645 | Cullin-2 OS=Homo sapiens OX=9606 GN=CUL2 PE=1 SV=2                                                           | CUL2_HUMAN      | CUL2     | 87 kDa  | 0 | 2 | 0 | 2 | 4 | 3 | 0  | 2  | 0 | 0 | 0 | 3  |
| 646 | DNA large homolog 1 OS=Homo sapiens OX=9606 GN=DLG1 PE=1 SV=2                                                | DLG1_HUMAN      | DLG1     | 100 kDa | 2 | 0 | 0 | 0 | 0 | 4 | 0  | 0  | 0 | 0 | 0 | 2  |
| 647 | Glycogen [starch] synthase, muscle OS=Homo sapiens OX=9606 GN=GYSL PE=1 SV=2                                 | GYSL_HUMAN      | GYSL     | 84 kDa  | 0 | 3 | 0 | 0 | 0 | 0 | 3  | 0  | 0 | 0 | 0 | 0  |
| 648 | Sec1 family domain-containing protein 1 OS=Homo sapiens OX=9606 GN=SCFD1 PE=1 SV=4                           | SCFD1_HUMAN     | SCFD1    | 72 kDa  | 5 | 0 | 2 | 0 | 0 | 6 | 0  | 0  | 0 | 0 | 0 | 0  |
| 649 | Rho-associated protein kinase 2 OS=Homo sapiens OX=9606 GN=ROCK2 PE=1 SV=4                                   | ROCK2_HUMAN     | ROCK2    | 161 kDa | 0 | 0 | 2 | 2 | 0 | 2 | 0  | 0  | 0 | 0 | 0 | 0  |
| 650 | 60S acidic ribosomal protein P0 OS=Homo sapiens OX=9606 GN=RLP0 PE=1 SV=1                                    | RLP0_HUMAN      | RLP0     | 34 kDa  | 0 | 0 | 0 | 5 | 2 | 3 | 2  | 0  | 0 | 0 | 0 | 2  |
| 651 | Immunoglobulin lambda-1 light chain OS=Homo sapiens OX=9606 PE=1 SV=1                                        | IGL1_HUMAN (+1) |          | 23 kDa  | 0 | 0 | 0 | 0 | 0 | 0 | 12 | 0  | 0 | 0 | 0 | 14 |
| 652 | Keratin, type II cytoskeletal 5 OS=Homo sapiens OX=9606 GN=KRT5 PE=1 SV=3                                    | K2C5_HUMAN      | KRT5     | 62 kDa  | 0 | 9 | 0 | 0 | 0 | 0 | 9  | 15 | 0 | 9 | 0 | 0  |
| 653 | Protein FAM234A OS=Homo sapiens OX=9606 GN=FAM234A PE=1 SV=1                                                 | F234A_HUMAN     | FAM234A  | 60 kDa  | 0 | 0 | 0 | 0 | 0 | 0 | 7  | 0  | 2 | 0 | 3 | 0  |
| 654 | Serine/threonine-protein kinase TAO3 OS=Homo sapiens OX=9606 GN=TAOK3 PE=1 SV=2                              | TAOK3_HUMAN     | TAOK3    | 105 kDa | 2 | 0 | 0 | 0 | 6 | 2 | 0  | 0  | 0 | 2 | 0 | 2  |
| 655 | Syntaxin-16 OS=Homo sapiens OX=9606 GN=STX16 PE=1 SV=3                                                       | STX16_HUMAN     | STX16    | 37 kDa  | 0 | 2 | 0 | 0 | 0 | 3 | 4  | 2  | 0 | 2 | 5 | 2  |
| 656 | Guanine nucleotide-binding protein G(I)/G(S)/G(O) subunit gamma-2 OS=Homo sapiens OX=9606 GN=GNNG2 PE=1 SV=2 | GNNG2_HUMAN     | GNNG2    | 8 kDa   | 0 | 0 | 2 | 0 | 0 | 0 | 0  | 0  | 0 | 0 | 0 | 0  |
| 657 | Actin-related protein 2/3 complex subunit 1A OS=Homo sapiens OX=9606 GN=ARPC1A PE=2 SV=2                     | ARPC1A_HUMAN    | ARPC1A   | 42 kDa  | 0 | 2 | 3 | 0 | 3 | 0 | 0  | 0  | 0 | 0 | 0 | 2  |
| 658 | Platelet basic protein OS=Homo sapiens OX=9606 GN=PPBP PE=1 SV=3                                             | CXC17_HUMAN     | PPBP     | 14 kDa  | 4 | 2 | 0 | 0 | 2 | 0 | 0  | 3  | 0 | 3 | 2 | 0  |
| 659 | S-phase kinase-associated protein 1 OS=Homo sapiens OX=9606 GN=SKP1 PE=1 SV=2                                | SKP1_HUMAN      | SKP1     | 19 kDa  | 0 | 0 | 0 | 2 | 0 | 3 | 0  | 0  | 0 | 0 | 0 | 0  |
| 660 | Voltage-gated potassium channel subunit beta-2 OS=Homo sapiens OX=9606 GN=KCNA2 PE=1 SV=2                    | KCAB2_HUMAN     | KCNA2    | 41 kDa  | 0 | 3 | 3 | 3 | 0 | 2 | 0  | 2  | 0 | 0 | 0 | 0  |
| 661 | ATPase ASNA1 OS=Homo sapiens OX=9606 GN=ASNA1 PE=1 SV=2                                                      | ASNA1_HUMAN     | ASNA1    | 39 kDa  | 0 | 0 | 3 | 0 | 3 | 3 | 0  | 0  | 0 | 0 | 0 | 0  |
| 662 | 60S ribosomal protein L4 OS=Homo sapiens OX=9606 GN=RLP4 PE=1 SV=5                                           | RL4_HUMAN       | RLP4     | 48 kDa  | 0 | 0 | 0 | 5 | 0 | 3 | 0  | 0  | 0 | 0 | 0 | 0  |
| 663 | E3 ubiquitin-protein ligase TRIM25 OS=Homo sapiens OX=9606 GN=TRIM25 PE=1 SV=2                               | TRIM25_HUMAN    | TRIM25   | 71 kDa  | 2 | 4 | 3 | 3 | 3 | 6 | 0  | 0  | 0 | 0 | 0 | 0  |
| 664 | Cyclin-Y OS=Homo sapiens OX=9606 GN=CCNY PE=1 SV=2                                                           | CCNY_HUMAN      | CCNY     | 39 kDa  | 0 | 0 | 0 | 0 | 0 | 0 | 0  | 0  | 0 | 0 | 0 | 0  |
| 665 | Actin-related protein-3 OS=Homo sapiens OX=9606 GN=ACTR3 PE=1 SV=3                                           | ARP3_HUMAN      | ACTR3    | 47 kDa  | 0 | 0 | 3 | 3 | 3 | 4 | 0  | 0  | 2 | 0 | 3 | 4  |
| 666 | Solute carrier family 22 member 23 OS=Homo sapiens OX=9606 GN=SLC22A23 PE=1 SV=2                             | S22AN_HUMAN     | SLC22A23 | 74 kDa  | 0 | 0 | 0 | 0 | 0 | 0 | 0  | 3  | 0 | 0 | 0 | 2  |
| 667 | 26S proteasome non-ATPase regulatory subunit 9 OS=Homo sapiens OX=9606 GN=PSMD9 PE=1 SV=3                    | PSMD9_HUMAN     | PSMD9    | 25 kDa  | 0 | 0 | 0 | 0 | 2 | 4 | 3  | 0  | 3 | 2 | 0 | 0  |
| 668 | Ribonucleoside-diphosphate reductase large subunit OS=Homo sapiens OX=9606 GN=RRM1 PE=1 SV=1                 | RIR1_HUMAN      | RRM1     | 90 kDa  | 0 | 0 | 3 | 5 | 6 | 3 | 0  | 0  | 0 | 0 | 0 | 0  |
| 669 | Ribosome maturation protein SBDS OS=Homo sapiens OX=9606 GN=SBDS PE=1 SV=4                                   | SBDS_HUMAN      | SBDS     | 29 kDa  | 0 | 0 | 0 | 0 | 0 | 0 | 3  | 0  | 0 | 0 | 4 | 0  |
| 670 | Cyclin-dependent kinase 2 OS=Homo sapiens OX=9606 GN=CDK2 PE=1 SV=2                                          | CDK2_HUMAN      | CDK2     | 34 kDa  | 0 | 3 | 0 | 0 | 2 | 2 | 0  | 0  | 0 | 0 | 3 | 3  |
| 671 | Reticulophagy regulator 3 OS=Homo sapiens OX=9606 GN=RETRG3 PE=1 SV=1                                        | RETR3_HUMAN     | RETRG3   | 51 kDa  | 0 | 3 | 4 | 3 | 3 | 2 | 0  | 0  | 0 | 0 | 0 | 0  |
| 672 | CTP synthase 2 OS=Homo sapiens OX=9606 GN=CTPS2 PE=1 SV=1                                                    | CTPS2_HUMAN     | CTPS2    | 66 kDa  | 0 | 0 | 0 | 2 | 3 | 5 | 0  | 0  | 0 | 0 | 4 | 0  |
| 673 | Elongation factor 1-gamma OS=Homo sapiens OX=9606 GN=EEF1G PE=1 SV=3                                         | EF1G_HUMAN      | EEF1G    | 50 kDa  | 0 | 7 | 2 | 4 | 6 | 0 | 0  | 0  | 0 | 0 | 0 | 0  |
| 674 | Methylome subunit pICn OS=Homo sapiens OX=9606 GN=CLNS1A PE=1 SV=1                                           | ICLN_HUMAN      | CLNS1A   | 26 kDa  | 2 | 0 | 0 | 3 | 3 | 3 | 0  | 0  | 0 | 0 | 0 | 0  |
| 675 | Coiled-coil domain-containing protein 124 OS=Homo sapiens OX=9606 GN=CCDC124 PE=1 SV=1                       | CC124_HUMAN     | CCDC124  | 26 kDa  | 0 | 3 | 2 | 3 | 0 | 0 | 0  | 0  | 0 | 0 | 3 | 0  |
| 676 | WD repeat-containing protein 26 OS=Homo sapiens OX=9606 GN=WDRC26 PE=1 SV=3                                  | WDR26_HUMAN     | WDR26    | 72 kDa  | 0 | 0 | 0 | 0 | 4 | 0 | 0  | 0  | 2 | 0 | 3 | 0  |
| 677 | PQ-loop repeat-containing protein 1 OS=Homo sapiens OX=9606 GN=PQLC1 PE=1 SV=1                               | PQLC1_HUMAN     | PQLC1    | 30 kDa  | 2 | 0 | 0 | 0 | 0 | 2 | 0  | 0  | 0 | 0 | 2 | 0  |
| 678 | H(+)/Cl(-) exchange transporter 3 OS=Homo sapiens OX=9606 GN=CLCN3 PE=1 SV=2                                 | CLCN3_HUMAN     | CLCN3    | 91 kDa  | 0 | 0 | 0 | 0 | 0 | 0 | 3  | 2  | 0 | 0 | 0 | 0  |
| 679 | Bisphosphoglycerate mutase OS=Homo sapiens OX=9606 GN=BMGM PE=1 SV=2                                         | PMGE_HUMAN      | BMGM     | 30 kDa  | 0 | 0 | 0 | 0 | 3 | 0 | 4  | 3  | 2 | 0 | 0 | 0  |
| 680 | Ran GTPase-activating protein 1 OS=Homo sapiens OX=9606 GN=RANGAP1 PE=1 SV=1                                 | RAGP1_HUMAN     | RANGAP1  | 64 kDa  | 0 | 0 | 0 | 0 | 2 | 3 | 2  | 3  | 0 | 0 | 0 | 0  |
| 681 | Transferrin receptor protein 1 OS=Homo sapiens OX=9606 GN=TFRC PE=1 SV=2                                     | TFR1_HUMAN      | TFRC     | 85 kDa  | 5 | 0 | 6 | 2 | 0 | 2 | 0  | 0  | 0 | 0 | 0 | 0  |
| 682 | Ephrin-B1 OS=Homo sapiens OX=9606 GN=EFNB1 PE=1 SV=1                                                         | EFNB1_HUMAN     | EFNB1    | 38 kDa  | 0 | 0 | 0 | 0 | 0 | 0 | 0  | 0  | 0 | 0 | 0 | 0  |
| 683 | RNA-binding motif protein, X chromosome OS=Homo sapiens OX=9606 GN=RBMX PE=1 SV=3                            | RBMX_HUMAN      | RBMX     | 42 kDa  | 2 | 0 | 0 | 3 | 0 | 2 | 2  | 0  | 0 | 0 | 0 | 0  |
| 684 | Microsomal glutathione S-transferase 2 OS=Homo sapiens OX=9606 GN=MGST2 PE=1 SV=1                            | MGST2_HUMAN     | MGST2    | 17 kDa  | 3 | 0 | 0 | 2 | 0 | 0 | 0  | 3  | 0 | 0 | 0 | 0  |
| 685 | V-type proton ATPase subunit G 1 OS=Homo sapiens OX=9606 GN=ATP6V1G1 PE=1 SV=3                               | VATG1_HUMAN     | ATP6V1G1 | 14 kDa  | 0 | 0 | 0 | 0 | 4 | 3 | 3  | 0  | 0 | 0 | 0 | 0  |
| 686 | Deoxyribonuclease-1-like 1 OS=Homo sapiens OX=9606 GN=DNASE1L1 PE=1 SV=1                                     | DNSE1L1_HUMAN   | DNASE1L1 | 34 kDa  | 0 | 0 | 0 | 0 | 2 | 0 | 0  | 0  | 0 | 0 | 0 | 0  |
| 687 | Tumor necrosis factor receptor superfamily member 6 OS=Homo sapiens OX=9606 GN=FNAS PE=1 SV=1                | TNR6_HUMAN      | FAS      | 38 kDa  | 0 | 0 | 0 | 0 | 0 | 0 | 2  | 2  | 0 | 3 | 4 | 0  |
| 688 | UPF0449 protein C19orf25 OS=Homo sapiens OX=9606 GN=C19orf25 PE=1 SV=2                                       | CSO25_HUMAN     | C19orf25 | 13 kDa  | 0 | 0 | 0 | 0 | 2 | 0 | 0  | 0  | 0 | 0 | 0 | 0  |
| 689 | Mitochondrial fission 1 protein OS=Homo sapiens OX=9606 GN=FIS1 PE=1 SV=2                                    | FIS1_HUMAN      | FIS1     | 17 kDa  | 0 | 0 | 0 | 0 | 0 | 0 | 0  | 0  | 0 | 0 | 2 | 0  |
| 690 | Autophagy-related protein 9A OS=Homo sapiens OX=9606 GN=ATG9A PE=1 SV=3                                      | ATG9A_HUMAN     | ATG9A    | 94 kDa  | 0 | 0 | 0 | 0 | 0 | 2 | 0  | 0  | 0 | 0 | 2 | 0  |
| 691 | Ubiquitin-like protein 4A OS=Homo sapiens OX=9606 GN=UBL4A PE=1 SV=1                                         | UBL4A_HUMAN     | UBL4A    | 18 kDa  | 3 | 0 | 0 | 0 | 0 | 0 | 0  | 0  | 0 | 0 | 0 | 0  |
| 692 | Palmitoyltransferase ZDHHC3 OS=Homo sapiens OX=9606 GN=ZDHHC3 PE=1 SV=2                                      | ZDHHC3_HUMAN    | ZDHHC3   | 34 kDa  | 0 | 0 | 0 | 0 | 0 | 3 | 0  | 0  | 0 | 0 | 0 | 0  |
| 693 | Synaptic vesicle membrane protein VAT-1 homolog OS=Homo sapiens OX=9606 GN=VAT1 PE=1 SV=2                    | VAT1_HUMAN      | VAT1     | 42 kDa  | 0 | 0 | 0 | 2 | 0 | 0 | 0  | 0  | 3 | 2 | 2 | 0  |
| 694 | Transmembrane emp24 domain-containing protein 5 OS=Homo sapiens OX=9606 GN=TMED5 PE=1 SV=1                   | TMED5_HUMAN     | TMED5    | 26 kDa  | 0 | 2 | 0 | 0 | 0 | 0 | 0  | 2  | 0 | 2 | 2 | 0  |
| 695 | Emerin OS=Homo sapiens OX=9606 GN=EMD PE=1 SV=1                                                              | EMD_HUMAN       | EMD      | 29 kDa  | 0 | 2 | 2 | 0 | 2 | 0 | 4  | 0  | 2 | 0 | 2 | 0  |
| 696 | Immunoglobulin heavy variable 3-7 OS=Homo sapiens OX=9606 GN=IGHV3-7 PE=1 SV=2                               | HV307_HUMAN     | IGHV3-7  | 13 kDa  | 0 | 0 | 0 | 0 | 0 | 3 | 0  | 3  | 0 | 0 | 0 | 0  |
| 697 | DnaI homolog subfamily A member 4 OS=Homo sapiens OX=9606 GN=DNAA4 PE=1 SV=1                                 | DNAA4_HUMAN     | DNAA4    | 45 kDa  | 0 | 0 | 0 | 4 | 5 | 6 | 0  | 0  | 0 | 0 | 0 | 3  |
| 698 | Complement C3 OS=Homo sapiens OX=9606 GN=C3 PE=1 SV=2                                                        | CO3_HUMAN       | C3       | 187 kDa | 0 | 0 | 0 | 0 | 2 | 2 | 0  | 0  | 0 | 0 | 0 | 5  |
| 699 | Casein kinase 1 isoform gamma-1 OS=Homo sapiens OX=9606 GN=CSNK1G1 PE=1 SV=1                                 | KC1G1_HUMAN     | CSNK1G1  | 49 kDa  | 0 | 0 | 0 | 0 | 0 | 0 | 6  | 4  | 5 | 0 | 4 | 0  |
| 700 | ADP-dependent glycohydrolase OS=Homo sapiens OX=9606 GN=ADPGK PE=1 SV=1                                      | ADPGK_HUMAN     | ADPGK    | 54 kDa  | 0 | 0 | 0 | 0 | 0 | 2 | 0  | 0  | 0 | 2 | 0 | 0  |
| 701 | Heterogeneous nuclear ribonucleoprotein D0 OS=Homo sapiens OX=9606 GN=HNRNPD PE=1 SV=1                       | HNRNPD_HUMAN    | HNRNPD   | 38 kDa  | 0 | 0 | 0 | 0 | 0 | 0 | 3  | 0  | 0 | 0 | 0 | 0  |
| 702 | Immunoglobulin kappa variable 3-15 OS=Homo sapiens OX=9606 GN=IGKV3-15 PE=1 SV=2                             | KV315_HUMAN     | IGKV3-15 | 12 kDa  | 0 | 0 | 0 | 3 | 0 | 0 | 0  | 0  | 0 | 0 | 0 | 0  |
| 703 | Elongin-C OS=Homo sapiens OX=9606 GN=ELOC PE=1 SV=1                                                          | ELOC_HUMAN      | ELOC     | 12 kDa  | 0 | 0 | 0 | 0 | 3 | 0 | 0  | 0  | 0 | 0 | 0 | 0  |
| 704 | Thioredoxin OS=Homo sapiens OX=9606 GN=TXN PE=1 SV=3                                                         | THIO_HUMAN      | TXN      | 12 kDa  | 0 | 0 | 0 | 0 | 0 | 3 | 0  | 0  | 0 | 0 | 0 | 0  |
| 705 | Optineurin OS=Homo sapiens OX=9606 GN=OPTN PE=1 SV=3                                                         | OPTN_HUMAN      | OPTN     | 66 kDa  | 0 | 0 | 0 | 0 | 0 | 0 | 4  | 2  | 0 | 2 | 3 | 2  |
| 706 | Leucyl-cystinyl aminopeptidase OS=Homo sapiens OX=9606 GN=LNPEP PE=1 SV=3                                    | LCAP_HUMAN      | LNPEP    | 117 kDa | 0 | 0 | 0 | 0 | 0 | 0 | 0  | 0  | 0 | 0 | 2 | 0  |
| 707 | Vacuolar protein sorting-associated protein 13C OS=Homo sapiens OX=9606 GN=VPS13C PE=1 SV=1                  | VPS13C_HUMAN    | VPS13C   | 422 kDa | 0 | 2 | 0 | 0 | 0 | 0 | 0  | 0  | 0 | 0 | 0 | 0  |
| 708 | Peptidyl-prolyl cis-trans isomerase FBXP2 OS=Homo sapiens OX=9606 GN=FBXP2 PE=1 SV=2                         | FBXP2_HUMAN     | FBXP2    | 16 kDa  | 0 | 0 | 0 | 0 | 0 | 3 | 4  | 3  | 2 | 0 | 0 | 0  |
| 709 | Peflin OS=Homo sapiens OX=9606 GN=PEF1 PE=1 SV=1                                                             | PEF1_HUMAN      | PEF1     | 30 kDa  | 2 | 0 | 2 | 0 | 0 | 2 | 0  | 0  | 0 | 0 | 0 | 0  |
| 710 | Polyadenylate-binding protein 1 OS=Homo sapiens OX=9606 GN=PABPC1 PE=1 SV=2                                  | PABP1_HUMAN     | PABPC1   | 71 kDa  | 0 | 0 | 0 | 0 | 2 | 0 | 0  | 0  | 0 | 0 | 2 | 2  |
| 711 | Peptidyl-prolyl cis-trans isomerase A OS=Homo sapiens OX=9606 GN=PIA PE=1 SV=2                               | PIA_HUMAN       | PIA      | 18 kDa  | 0 | 0 | 2 | 0 | 0 | 0 | 0  | 3  | 0 | 0 | 0 | 0  |
| 712 | Claudin domain-containing protein 1 OS=Homo sapiens OX=9606 GN=CLNDN1 PE=1 SV=1                              | CLDN1_HUMAN     | CLNDN1   | 29 kDa  | 0 | 0 | 0 | 0 | 0 | 0 | 2  | 3  | 2 | 0 | 3 | 2  |
| 713 | Structural maintenance of chromosomes protein 4 OS=Homo sapiens OX=9606 GN=SMC4 PE=1 SV=2                    | SMC4_HUMAN      | SMC4     | 147 kDa | 0 | 2 | 2 | 0 | 3 | 4 | 0  | 0  | 0 | 0 | 0 | 3  |
| 714 | 60S ribosomal protein L12 OS=Homo sapiens OX=9606 GN=RLP12 PE=1 SV=1                                         | RL12_HUMAN      | RLP12    | 18 kDa  | 0 | 0 | 3 | 0 | 3 | 2 | 4  | 0  | 0 | 0 | 0 | 0  |
| 715 | Rab-interacting lysosomal protein OS=Homo sapiens OX=9606 GN=RLP PE=1 SV=1                                   | RLP_HUMAN       | RLP      | 44 kDa  | 0 | 0 | 0 | 0 | 3 | 3 | 0  | 0  | 0 | 0 | 0 | 0  |
| 716 | Calumenin OS=Homo sapiens OX=9606 GN=CALU PE=1 SV=2                                                          | CALU_HUMAN      | CALU     | 37 kDa  | 0 | 0 | 0 | 0 | 0 | 0 | 4  | 0  | 0 | 2 | 0 | 0  |
| 717 | B-cell receptor-associated protein 2 OS=Homo sapiens OX=9606 GN=BCAP29 PE=1 SV=2                             | BAP29_HUMAN     | BCAP29   | 28 kDa  | 0 | 0 | 0 | 0 | 0 | 0 | 0  | 2  | 0 | 0 | 0 | 0  |
| 718 | Secretory carrier-associated membrane protein 2 OS=Homo sapiens OX=9606 GN=SCAMP2 PE=1 SV=2                  | SCAMP2_HUMAN    | SCAMP2   | 37 kDa  | 0 | 0 | 0 | 0 | 0 | 0 | 0  | 0  | 0 | 0 | 3 | 0  |
| 719 | Vacuolar protein sorting-associated protein 28 homolog OS=Homo sapiens OX=9606 GN=VPS28 PE=1 SV=1            | VPS28_HUMAN     | VPS28    | 25 kDa  | 0 | 0 | 0 | 0 | 4 | 3 | 0  | 2  | 0 | 0 | 3 | 0  |
| 720 | Programmed cell death protein 5 OS=Homo sapiens OX=9606 GN=PPDC5 PE=1 SV=3                                   | PPDC5_HUMAN     | PPDC5    | 14 kDa  | 0 | 0 | 0 | 0 | 2 | 0 | 0  | 0  | 0 | 0 | 0 | 0  |
| 721 | Tubulin-tyrosine ligase-like protein 12 OS=Homo sapiens OX=9606 GN=TTLL12 PE=1 SV=2                          | TTLL12_HUMAN    | TTLL12   | 74 kDa  | 0 | 0 | 0 | 0 | 3 | 4 | 0  | 0  | 0 | 0 | 0 | 0  |
| 722 | Armadillo repeat-containing protein 8 OS=Homo sapiens OX=9606 GN=ARMC8 PE=1 SV=2                             | ARMC8_HUMAN     | ARMC8    | 76 kDa  | 0 | 2 | 0 | 0 | 0 | 0 | 0  | 0  | 0 | 0 | 0 | 0  |
| 723 | Tyrosine-protein kinase Yes OS=Homo sapiens OX=9606 GN=YES1 PE=1 SV=3                                        | YES_HUMAN       | YES1     | 61 kDa  |   |   |   |   |   |   |    |    |   |   |   |    |



[illegible]



|     |                                                                                           |             |        |         |   |   |   |   |   |   |   |   |   |   |   |   |
|-----|-------------------------------------------------------------------------------------------|-------------|--------|---------|---|---|---|---|---|---|---|---|---|---|---|---|
| 825 | L-xylulose reductase OS=Homo sapiens OX=9606 GN=DCXR PE=1 SV=2                            | DCXR_HUMAN  | DCXR   | 26 kDa  | 0 | 0 | 0 | 0 | 0 | 2 | 0 | 0 | 0 | 0 | 0 | 0 |
| 826 | Gelsolin OS=Homo sapiens OX=9606 GN=GSN PE=1 SV=1                                         | GELS_HUMAN  | GSN    | 86 kDa  | 0 | 0 | 0 | 0 | 2 | 0 | 0 | 0 | 0 | 0 | 0 | 0 |
| 827 | Sodium/hydrogen exchanger 6 OS=Homo sapiens OX=9606 GN=SLC9A6 PE=1 SV=2                   | SL9A6_HUMAN | SLC9A6 | 74 kDa  | 0 | 0 | 0 | 0 | 0 | 0 | 3 | 0 | 0 | 0 | 0 | 0 |
| 828 | CD151 antigen OS=Homo sapiens OX=9606 GN=CD151 PE=1 SV=3                                  | CD151_HUMAN | CD151  | 28 kDa  | 0 | 0 | 0 | 0 | 0 | 0 | 2 | 0 | 0 | 0 | 0 | 0 |
| 829 | Immunoglobulin heavy constant delta OS=Homo sapiens OX=9606 GN=IGHD PE=1 SV=3             | IGHD_HUMAN  | IGHD   | 42 kDa  | 0 | 0 | 0 | 2 | 0 | 0 | 0 | 0 | 0 | 0 | 0 | 0 |
| 830 | Endoglin OS=Homo sapiens OX=9606 GN=ENG PE=1 SV=2                                         | EGLN_HUMAN  | ENG    | 71 kDa  | 0 | 0 | 0 | 0 | 0 | 0 | 0 | 0 | 0 | 2 | 0 | 0 |
| 831 | STE20-like serine/threonine-protein kinase OS=Homo sapiens OX=9606 GN=SLK PE=1 SV=1       | SLK_HUMAN   | SLK    | 143 kDa | 0 | 0 | 0 | 0 | 2 | 0 | 0 | 0 | 0 | 0 | 0 | 0 |
| 832 | Eukaryotic initiation factor 4A-1 OS=Homo sapiens OX=9606 GN=EIF4A1 PE=1 SV=1             | IF4A1_HUMAN | EIF4A1 | 46 kDa  | 0 | 0 | 0 | 0 | 2 | 0 | 0 | 0 | 0 | 0 | 0 | 0 |
| 833 | Vacuolar protein sorting-associated protein 4A OS=Homo sapiens OX=9606 GN=VPS4A PE=1 SV=1 | VPS4A_HUMAN | VPS4A  | 49 kDa  | 0 | 0 | 0 | 0 | 0 | 3 | 0 | 0 | 0 | 0 | 0 | 0 |
