# Supplementary material for: Proteome of Stored RBC Membrane and Vesicles from Heterozygous Beta Thalassemia Donors
Source: MDPI journal article supplement (doi:10.3390/ijms22073369), 2021-03-25
Supplement: s1 [file s1]

**Supplementary Table S7.** RBC properties and RBC membrane components connected to EV characteristics.

| RBC parameter                                      | Number of connections with EVs |         |
|----------------------------------------------------|--------------------------------|---------|
|                                                    | $\beta$ Thal <sup>+</sup>      | Control |
| Proteasome                                         | 163                            | 99      |
| Small GTPases                                      | 90                             | 139     |
| IgGs                                               | 70                             | 28      |
| Kinases                                            | 36                             | 49      |
| Molecular chaperones                               | 36                             | 39      |
| Glutaredoxin SH3BGRL                               | 23                             | 9       |
| SH3 domain-binding glutamic acid-rich-like protein | 23                             | 9       |
| Ca <sup>2+</sup> -regulated proteins               | 21                             | 20      |
| Phosphatases                                       | 17                             | 2       |
| Long chain fatty acid-CoA ligase 6                 | 17                             | 12      |
| MCH/MCHC                                           | 17                             | 6       |
| Glycophorin A                                      | 15                             | 5       |
| Spectrins                                          | 15                             | 3       |
| Synnexin                                           | 15                             | 5       |
| Total antioxidant capacity (supernatant)           | 14                             | 6       |
| Diamide-induced ROS                                | 3                              | 16      |
| Oxidative hemolysis                                | 15                             | -       |
| Deoxyribose-phosphate aldolase                     | 13                             | -       |
| Spontaneous storage hemolysis                      | 12                             | -       |
