# Supplementary material for: Proteome of Stored RBC Membrane and Vesicles from Heterozygous Beta Thalassemia Donors
Source: MDPI journal article supplement (doi:10.3390/ijms22073369), 2021-03-25
Supplement: s1 [file s1]

**Supplementary Table S6.** Numerical code used for the presentation of RBC and supernatant measurements, including RBC and EVs proteome data, in the biological networks shown in Figures 10 and 11.

| Parameter                                             | Abbreviation |
|-------------------------------------------------------|--------------|
| Alpha-1B-glycoprotein (A1BG)                          | 1            |
| Alpha-2-macroglobulin (A2M)                           | 2            |
| ATP-binding cassette sub-family B member 6 (ABCB6)    | 3            |
| Multidrug resistance-associated protein 1 (ABCC1)     | 4            |
| Multidrug resistance-associated protein 4 (ABCC4)     | 5            |
| Multidrug resistance-associated protein 5 (ABCC5)     | 6            |
| ATP-binding cassette sub-family G member 2 (ABCG2)    | 7            |
| Acetylcholinesterase (ACHE)                           | 8            |
| ATP-citrate synthase (ACLY)                           | 9            |
| Long-chain-fatty-acid--CoA ligase 3 (ACSL3)           | 10           |
| Long-chain-fatty-acid--CoA ligase 4 (ACSL4)           | 11           |
| Long-chain-fatty-acid--CoA ligase 6 (ACSL6)           | 12           |
| Actin, alpha (ACTA1)                                  | 13           |
| Actin, cytoplasmic 1 (ACTB)                           | 14           |
| Beta-actin-like protein 2 (ACTBL2)                    | 15           |
| Actin, cytoplasmic 2 (ACTG1)                          | 16           |
| Alpha-centractin (ACTR1A)                             | 17           |
| Alpha-adducin (ADD1)                                  | 18           |
| Beta-adducin (ADD2)                                   | 19           |
| Gamma-adducin (ADD3)                                  | 20           |
| Protein argonaute-2 (AGO2)                            | 21           |
| Adenosylhomocysteinase (AHCY)                         | 22           |
| Alpha-2-HS-glycoprotein (AHSG)                        | 23           |
| Alpha-hemoglobin-stabilizing protein (AHSP)           | 24           |
| Adenylate kinase isoenzyme 1 (AK1)                    | 25           |
| Delta-aminolevulinic acid dehydratase (ALAD)          | 26           |
| Serum albumin (ALB)                                   | 27           |
| Aldehyde dehydrogenase family 16 member A1 (ALDH16A1) | 28           |
| Retinal dehydrogenase 1 (ALDH1A1)                     | 29           |
| Fructose-bisphosphate aldolase A (ALDOA)              | 30           |
| Fructose-bisphosphate aldolase C (ALDOC)              | 31           |
| Ankyrin-1 (ANK1)                                      | 32           |
| Annexin A4 (ANXA4)                                    | 33           |
| Annexin A4 (ANXA4)                                    | 34           |
| Annexin A7 (ANXA7)                                    | 35           |
| AP-1 complex subunit beta-1 (AP1B1)                   | 36           |
| AP-2 complex subunit alpha-1 (AP2A1)                  | 37           |
| AP-2 complex subunit alpha-2 (AP2A2)                  | 38           |
| AP-2 complex subunit beta (AP2B1)                     | 39           |
| AP-2 complex subunit mu (AP2M1)                       | 40           |
| Acylamino-acid-releasing enzyme (APEH)                | 41           |

|                                                               |    |
|---------------------------------------------------------------|----|
| Apolipoprotein A-I (APOA1)                                    | 42 |
| Apolipoprotein A-II (APOA2)                                   | 43 |
| Apolipoprotein A-IV (APOA4)                                   | 44 |
| Apolipoprotein B-100 (APOB)                                   | 45 |
| Apolipoprotein E (APOE)                                       | 46 |
| Beta-2-glycoprotein 1 (APOH)                                  | 47 |
| Aquaporin-1 (AQP1)                                            | 48 |
| ADP-ribosylation factor 1 (ARF1)                              | 49 |
| Arginase-1 (ARG1)                                             | 50 |
| Atlastin-3 (ATL3)                                             | 51 |
| Sodium/potassium-transporting ATPase subunit alpha-1 (ATP1A1) | 52 |
| Plasma membrane calcium-transporting ATPase 1 (ATP2B1)        | 53 |
| Plasma membrane calcium-transporting ATPase 4 (ATP2B4)        | 54 |
| Copper-transporting ATPase 1 (ATP7A)                          | 55 |
| Basal cell adhesion molecule (BCAM)                           | 56 |
| Flavin reductase (BLVRB)                                      | 57 |
| BMP-2-inducible protein kinase (BMP2K)                        | 58 |
| Bisphosphoglycerate mutase (BPGM)                             | 59 |
| Basigin (BSG)                                                 | 60 |
| Phospholipid transfer protein (C2CD2L)                        | 61 |
| Small membrane A-kinase anchor protein (C2orf88)              | 62 |
| Complement C3 (C3)                                            | 63 |
| Complement C4-B (C4B)                                         | 64 |
| C4b-binding protein alpha chain (C4BPA)                       | 65 |
| Intracellular calcium levels                                  | 66 |
| Carbonic anhydrase 1 (CA1)                                    | 67 |
| Carbonic anhydrase 2 (CA2)                                    | 68 |
| Carbonic anhydrase 3 (CA3)                                    | 69 |
| Calmodulin-1 (CALM1)                                          | 70 |
| Calreticulin (CALR)                                           | 71 |
| Cullin-associated NEDD8-dissociated protein 1 (CAND1)         | 72 |
| Calnexin (CANX)                                               | 73 |
| Calpain-1 catalytic subunit (CAPN1)                           | 74 |
| Calpain-5 (CAPN5)                                             | 75 |
| Calpain small subunit 1 (CAPNS1)                              | 76 |
| F-actin-capping protein subunit alpha-1 (CAPZA1)              | 77 |
| F-actin-capping protein subunit beta (CAPZB)                  | 78 |
| Caspase 3 (Immunoblot)                                        | 79 |
| Calpastatin (CAST)                                            | 80 |
| Catalase (CAT)                                                | 81 |
| Coiled-coil and C2 domain-containing protein 1A (CC2D1A)      | 82 |
| T-complex protein 1 subunit beta (CCT2)                       | 83 |
| T-complex protein 1 subunit gamma (CCT3)                      | 84 |
| T-complex protein 1 subunit delta (CCT4)                      | 85 |

|                                                            |     |
|------------------------------------------------------------|-----|
| T-complex protein 1 subunit epsilon (CCT5)                 | 86  |
| T-complex protein 1 subunit zeta (CCT6A)                   | 87  |
| T-complex protein 1 subunit eta (CCT7)                     | 88  |
| T-complex protein 1 subunit theta (CCT8)                   | 89  |
| CD44 antigen (CD44)                                        | 90  |
| Complement decay-accelerating factor (CD55)                | 91  |
| Lymphocyte function-associated antigen 3 (CD58)            | 92  |
| CD59 glycoprotein (CD59)                                   | 93  |
| CD5 antigen-like (CD5L)                                    | 94  |
| Cell division control protein 42 homolog (CDC42)           | 95  |
| Complement factor B (CFB)                                  | 96  |
| Cofilin-1 (CFL1)                                           | 97  |
| Charged multivesicular body protein 4b (CHMP4B)            | 98  |
| Clathrin heavy chain 1 (CLTC)                              | 99  |
| Clusterin (CLU)                                            | 100 |
| 2',3'-cyclic-nucleotide 3'-phosphodiesterase (CNP)         | 101 |
| CB1 cannabinoid receptor-interacting protein 1 (CNRI1)     | 102 |
| COP9 signalosome complex subunit 2 (COPS2)                 | 103 |
| COP9 signalosome complex subunit 3 (COPS3)                 | 104 |
| COP9 signalosome complex subunit 4 (COPS4)                 | 105 |
| COP9 signalosome complex subunit 6 (COPS6)                 | 106 |
| Ceruloplasmin (CP)                                         | 107 |
| Copine-3 (CPNE3)                                           | 108 |
| Complement receptor type 1 (CR1)                           | 109 |
| Casein kinase I isoform alpha (CSNK1A1)                    | 110 |
| Cullin-1 (CUL1)                                            | 111 |
| NADH-cytochrome b5 reductase 3 (CYB5R3)                    | 112 |
| Disheveled-associated activator of morphogenesis 1 (DAAM1) | 113 |
| Dynactin subunit 1 (DCTN1)                                 | 114 |
| Dynactin subunit 2 (DCTN2)                                 | 115 |
| Protein DDI1 homolog 2 (DDI2)                              | 116 |
| Deoxyribose-phosphate aldolase (DERA)                      | 117 |
| Diamide-induced intracellular ROS levels                   | 118 |
| Protein diaphanous homolog 1 (DIAPH1)                      | 119 |
| Dematin (DMTN)                                             | 120 |
| DnaJ homolog subfamily B member 1 (DNAJB1)                 | 121 |
| DnaJ homolog subfamily C member 13 (DNAJC13)               | 122 |
| Dynammin-2 (DNM2)                                          | 123 |
| Proteasome adapter and scaffold protein ECM29 (ECPAS)      | 124 |
| Elongation factor 1-alpha 1 (EEF1A1)                       | 125 |
| EH domain-binding protein 1-like protein 1 (EHBP1L1)       | 126 |
| EH domain-containing protein 1 (EHD1)                      | 127 |
| Eukaryotic translation initiation factor 5A-1 (EIF5A)      | 128 |
| Endonuclease domain-containing 1 protein (ENDOD1)          | 129 |

|                                                                            |     |
|----------------------------------------------------------------------------|-----|
| Alpha-enolase (ENO1)                                                       | 130 |
| Protein 4.1 (EPB41)                                                        | 131 |
| Band 4.1-like protein 2 (EPB41L2)                                          | 132 |
| Erythrocyte membrane protein band 4.2 (EPB42)                              | 133 |
| Epoxide hydrolase 1 (EPHX1)                                                | 134 |
| Erythroid membrane-associated protein (ERMAP)                              | 135 |
| Endoplasmic reticulum resident protein 44 (ERP44)                          | 136 |
| S-formylglutathione hydrolase (ESD)                                        | 137 |
| EV Protein Carbonylation                                                   | 138 |
| Ezrin (EZR)                                                                | 139 |
| Junctional adhesion molecule A (F11R)                                      | 140 |
| Prothrombin (F2)                                                           | 141 |
| Fatty acid synthase (FASN)                                                 | 142 |
| Fibrinogen alpha chain (FGA)                                               | 143 |
| Fibrinogen beta chain (FGB)                                                | 144 |
| Fibrinogen gamma chain (FGG)                                               | 145 |
| Peptidyl-prolyl cis-trans isomerase (FKBP3)                                | 146 |
| Flotillin-1 (FLOT1)                                                        | 147 |
| Flotillin-2 (FLOT2)                                                        | 148 |
| Storage Hemolysis                                                          | 149 |
| Glyceraldehyde-3-phosphate dehydrogenase (GAPDH)                           | 150 |
| GTPase-activating protein and VPS9 domain-containing protein 1 (GAPVD1)    | 151 |
| Vitamin D-binding protein (GC)                                             | 152 |
| Rab GDP dissociation inhibitor beta (GDI2)                                 | 153 |
| Golgi-associated plant pathogenesis-related protein 1 (GLIPR2)             | 154 |
| GMP reductase 1 (GMPR)                                                     | 155 |
| Guanine nucleotide-binding protein subunit alpha-13 (GNA13)                | 156 |
| Guanine nucleotide-binding protein G(i) subunit alpha-2 (GNAI2)            | 157 |
| Guanine nucleotide-binding protein G(k) subunit alpha (GNAI3)              | 158 |
| Guanine nucleotide-binding protein G(q) subunit alpha (GNAQ)               | 159 |
| Guanine nucleotide-binding protein G(s) subunit alpha isoforms XLas (GNAS) | 160 |
| Guanine nucleotide-binding protein G(I)/G(S)/G(T) subunit beta-1 (GNB1)    | 161 |
| Guanine nucleotide-binding protein G(I)/G(S)/G(T) subunit beta-2 (GNB2)    | 162 |
| Aspartate aminotransferase (GOT1)                                          | 163 |
| G protein-coupled receptor kinase 6 (GRK6)                                 | 164 |
| Glutathione S-transferase omega-1 (GSTO1)                                  | 165 |
| Glycophorin-A (GYPA)                                                       | 166 |
| Glycophorin-C (GYPC)                                                       | 167 |
| Hemoglobin (g/dL)                                                          | 168 |
| Hemoglobin subunit alpha (HBA1)                                            | 169 |
| Hemoglobin subunit beta (HBB)                                              | 170 |
| Hemoglobin subunit delta (HBD)                                             | 171 |
| Hemoglobin subunit gamma-1 (HBG1)                                          | 172 |
| Hemoglobin subunit theta-1 (HBQ1)                                          | 173 |

|                                                                                |     |
|--------------------------------------------------------------------------------|-----|
| Hematocrit                                                                     | 174 |
| Heme-binding protein 1 (HEBP1)                                                 | 175 |
| Porphobilinogen deaminase (HMBS)                                               | 176 |
| Haptoglobin (HP)                                                               | 177 |
| Hypoxanthine-guanine phosphoribosyltransferase (HPRT1)                         | 178 |
| Hemopexin (HPX)                                                                | 179 |
| Very-long-chain 3-oxoacyl-CoA reductase (HSD17B12)                             | 180 |
| Heat shock protein HSP 90-alpha (HSP90AA1)                                     | 181 |
| Heat shock 70 kDa protein 1A (HSPA1A)                                          | 182 |
| Heat shock 70 kDa protein 4 (HSPA4)                                            | 183 |
| Endoplasmic reticulum chaperone BiP (HSPA5)                                    | 184 |
| Heat shock cognate 71 kDa protein (HSPA8)                                      | 185 |
| E3 ubiquitin-protein ligase (HUWE1)                                            | 186 |
| Intercellular adhesion molecule 4 (ICAM4)                                      | 187 |
| Immunoglobulin gamma-1 heavy chain                                             | 188 |
| Immunoglobulin gamma-1 heavy chain                                             | 189 |
| Immunoglobulin heavy constant alpha 1 (IGHA1)                                  | 190 |
| Immunoglobulin heavy constant gamma 2 (IGHG2)                                  | 191 |
| Immunoglobulin heavy constant gamma 3 (IGHG3)                                  | 192 |
| Immunoglobulin heavy constant mu (IGHM)                                        | 193 |
| Immunoglobulin kappa light chain                                               | 194 |
| Immunoglobulin kappa light chain                                               | 195 |
| Immunoglobulin kappa constant (IGKC)                                           | 196 |
| Immunoglobulin lambda-1 light chain                                            | 197 |
| Immunoglobulin lambda-like polypeptide 5 (IGLL5)                               | 198 |
| Importin-5 (IPO5)                                                              | 199 |
| Importin-7 (IPO7)                                                              | 200 |
| Inter-alpha-trypsin inhibitor heavy chain H4 (ITIH4)                           | 201 |
| Extracellular K <sup>+</sup> levels                                            | 202 |
| Intermediate conductance calcium-activated potassium channel protein 4 (KCNN4) | 203 |
| Kell blood group glycoprotein (KEL)                                            | 204 |
| Importin subunit beta-1 (KPNB1)                                                | 205 |
| GTPase KRas (KRAS)                                                             | 206 |
| Glutathione S-transferase (LANCL1)                                             | 207 |
| LanC-like protein 2 (LANCL2)                                                   | 208 |
| L-lactate dehydrogenase B chain (LDHB)                                         | 209 |
| Galectin-3 (LGALS3)                                                            | 210 |
| Vesicular integral-membrane protein VIP36 (LMAN2)                              | 211 |
| Mean corpuscular fragility index (MCF)                                         | 212 |
| MCH                                                                            | 213 |
| MCHC                                                                           | 214 |
| MCV                                                                            | 215 |
| Membrane lipid peroxidation                                                    | 216 |
| Malate dehydrogenase (MDH1)                                                    | 217 |

|                                                                  |     |
|------------------------------------------------------------------|-----|
| Methyltransferase-like protein 7A (METTL7A)                      | 218 |
| Mechanical fragility index (MFI)                                 | 219 |
| Multiple inositol polyphosphate phosphatase 1(MINPP1)            | 220 |
| 55 kDa erythrocyte membrane protein (MPP1)                       | 221 |
| Moesin (MSN)                                                     | 222 |
| C-1-tetrahydrofolate synthase (MTHFD1)                           | 223 |
| Myosin-10 (MYH10)                                                | 224 |
| Myosin-9 (MYH9)                                                  | 225 |
| Myosin regulatory light chain 12B (MYL12B)                       | 226 |
| Myosin light chain 4 (MYL4)                                      | 227 |
| Unconventional myosin-XVIIIa (MYO18A)                            | 228 |
| Extracellular Na <sup>+</sup> levels                             | 229 |
| Nucleosome assembly protein 1-like 1 (NAP1L1)                    | 230 |
| Nucleosome assembly protein 1-like 4 (NAP1L4)                    | 231 |
| Alpha-soluble NSF attachment protein (NAPA)                      | 232 |
| Neutral cholesterol ester hydrolase 1 (NCEH1)                    | 233 |
| Nucleoside diphosphate kinase A (NME1)                           | 234 |
| GTPase NRas (NRAS)                                               | 235 |
| Vesicle-fusing ATPase (NSF)                                      | 236 |
| Obg-like ATPase 1 (OLA1)                                         | 237 |
| Alpha-1-acid glycoprotein 1 (ORM1)                               | 238 |
| Alpha-1-acid glycoprotein 2 (ORM2)                               | 239 |
| Oxidative hemolysis                                              | 240 |
| Protein disulfide-isomerase (P4HB)                               | 241 |
| Proliferation-associated protein 2G4 (PA2G4)                     | 242 |
| Protein/nucleic acid deglycase DJ-1 (PARK7)                      | 243 |
| Protein-L-isoaspartate(D-aspartate) O-methyltransferase (PCMT1)  | 244 |
| Programmed cell death 6-interacting protein (PDCD6IP)            | 245 |
| Protein disulfide-isomerase A3 (PDIA3)                           | 246 |
| Protein disulfide-isomerase A6 (PDIA6)                           | 247 |
| Phosphatidylethanolamine-binding protein 1 (PEBP1)               | 248 |
| ATP-dependent 6-phosphofructokinase, liver type (PFKL)           | 249 |
| ATP-dependent 6-phosphofructokinase, muscle type (PFKM)          | 250 |
| 6-phosphogluconate dehydrogenase, decarboxylating (PGD)          | 251 |
| Phosphoglycerate kinase 1 (PGK1)                                 | 252 |
| Phenylhydrazine-induced intracellular ROS levels                 | 253 |
| Phosphatidylinositol 4-kinase type 2-alpha (PI4K2A)              | 254 |
| Phosphatidylinositol-binding clathrin assembly protein (PICALM)  | 255 |
| Piezo-type mechanosensitive ion channel component 1 (PIEZO1)     | 256 |
| Phosphatidylinositol 5-phosphate 4-kinase type-2 alpha (PIP4K2A) | 257 |
| Phospholipid scramblase 1 (PLSCR1)                               | 258 |
| Purine nucleoside phosphorylase (PNP)                            | 259 |
| Neuropathy target esterase (PNPLA6)                              | 260 |
| Peptidyl-prolyl cis-trans isomerase A (PPIA)                     | 261 |

|                                                                                             |     |
|---------------------------------------------------------------------------------------------|-----|
| Peptidyl-prolyl cis-trans isomerase B (PPIB)                                                | 262 |
| Serine/threonine-protein phosphatase 2A 65 kDa regulatory subunit A alpha isoform (PPP2R1A) | 263 |
| Peroxiredoxin-1 (PRDX1)                                                                     | 264 |
| Peroxiredoxin-2 (PRDX2)                                                                     | 265 |
| Peroxiredoxin-6 (PRDX6)                                                                     | 266 |
| cAMP-dependent protein kinase catalytic subunit alpha (PRKACA)                              | 267 |
| cAMP-dependent protein kinase type I-alpha regulatory subunit (PRKAR1A)                     | 268 |
| Protein arginine N-methyltransferase 5 (PRMT5)                                              | 269 |
| Ribose-phosphate pyrophosphokinase 1 (PRPS1)                                                | 270 |
| Phosphoribosyl pyrophosphate synthase-associated protein 2 (PRPSAP2)                        | 271 |
| Externalized phosphatidylserine levels                                                      | 272 |
| Proteasome subunit alpha type-1 (PSMA1)                                                     | 273 |
| Proteasome subunit alpha type-2 (PSMA2)                                                     | 274 |
| Proteasome subunit alpha type-3 (PSMA3)                                                     | 275 |
| Proteasome subunit alpha type-4 (PSMA4)                                                     | 276 |
| Proteasome subunit alpha type-5 (PSMA5)                                                     | 277 |
| Proteasome subunit alpha type-6 (PSMA6)                                                     | 278 |
| Proteasome subunit alpha type-7 (PSMA7)                                                     | 279 |
| Proteasome subunit beta type-1 (PSMB1)                                                      | 280 |
| Proteasome subunit beta type-2 (PSMB2)                                                      | 281 |
| Proteasome subunit beta type-3 (PSMB3)                                                      | 282 |
| Proteasome subunit beta type-4 (PSMB4)                                                      | 283 |
| Proteasome subunit beta type-5 (PSMB5)                                                      | 284 |
| Proteasome subunit beta type-7 (PSMB7)                                                      | 285 |
| 26S proteasome regulatory subunit 4 (PSMC1)                                                 | 286 |
| 26S proteasome regulatory subunit 7 (PSMC2)                                                 | 287 |
| 26S proteasome regulatory subunit 6A (PSMC3)                                                | 288 |
| 26S proteasome regulatory subunit 6B (PSMC4)                                                | 289 |
| 26S proteasome regulatory subunit 8 (PSMC5)                                                 | 290 |
| 26S proteasome regulatory subunit 10B (PSMC6)                                               | 291 |
| 26S proteasome non-ATPase regulatory subunit 1 (PSMD1)                                      | 292 |
| 26S proteasome non-ATPase regulatory subunit 11 (PSMD11)                                    | 293 |
| 26S proteasome non-ATPase regulatory subunit 12 (PSMD12)                                    | 294 |
| 26S proteasome non-ATPase regulatory subunit 13 (PSMD13)                                    | 295 |
| 26S proteasome non-ATPase regulatory subunit 14 (PSMD14)                                    | 296 |
| 26S proteasome non-ATPase regulatory subunit 2 (PSMD2)                                      | 297 |
| 26S proteasome non-ATPase regulatory subunit 3 (PSMD3)                                      | 298 |
| 26S proteasome non-ATPase regulatory subunit 5 (PSMD5)                                      | 299 |
| 26S proteasome non-ATPase regulatory subunit 6 (PSMD6)                                      | 300 |
| 26S proteasome non-ATPase regulatory subunit 7 (PSMD7)                                      | 301 |
| 26S proteasome non-ATPase regulatory subunit 8 (PSMD8)                                      | 302 |
| Proteasome activator complex subunit 1 (PSME1)                                              | 303 |
| Proteasome activator complex subunit 2 (PSME2)                                              | 304 |
| Polypyrimidine tract-binding protein 1 (PTBP1)                                              | 305 |

|                                                                 |     |
|-----------------------------------------------------------------|-----|
| Phosphorylated tyrosine levels                                  | 306 |
| Pyrroline-5-carboxylate reductase 3 (PYCR3)                     | 307 |
| Ras-related protein Rab-10 (RAB10)                              | 308 |
| Ras-related protein Rab-18 (RAB18)                              | 309 |
| Ras-related protein Rab-1B (RAB1B)                              | 310 |
| Ras-related protein Rab-21 (RAB21)                              | 311 |
| Ras-related protein Rab-2B (RAB2B)                              | 312 |
| Ras-related protein Rab-35 (RAB35)                              | 313 |
| Ras-related protein Rab-35 (RAB35)                              | 314 |
| Ras-related protein Rab-5C (RAB5C)                              | 315 |
| Ras-related protein Rab-7a (RAB7A)                              | 316 |
| Ras-related protein Rab-8A (RAB8A)                              | 317 |
| Ras-related protein Rab-8B (RAB8B)                              | 318 |
| Ras-related C3 botulinum toxin substrate 1 (RAC1)               | 319 |
| UV excision repair protein RAD23 homolog A (RAD23A)             | 320 |
| Ras-related protein Ral-A (RALA)                                | 321 |
| GTP-binding nuclear protein Ran (RAN)                           | 322 |
| Ras-related protein Rap-1A (RAP1A)                              | 323 |
| Ras-related protein Rap-1b (RAP1B)                              | 324 |
| Ras-related protein Rap-2a (RAP2A)                              | 325 |
| Ras-related protein Rap-2b (RAP2B)                              | 326 |
| RBC count                                                       | 327 |
| RDW                                                             | 328 |
| Radixin (RDX)                                                   | 329 |
| Ammonium transporter Rh type A (RHAG)                           | 330 |
| Blood group Rh(CE) polypeptide (RHCE)                           | 331 |
| Transforming protein RhoA (RHOA)                                | 332 |
| Ribonuclease inhibitor (RNH1)                                   | 333 |
| Intracellular ROS levels                                        | 334 |
| Protein XRP2 (RP2)                                              | 335 |
| RuvB-like 1 (RUVBL1)                                            | 336 |
| RuvB-like 2 (RUVBL2)                                            | 337 |
| Phosphatidylinositol phosphatase SAC1 (SACM1L)                  | 338 |
| Vesicle-trafficking protein SEC22b (SEC22B)                     | 339 |
| Methanethiol oxidase (SELENBP1)                                 | 340 |
| Semaphorin-7A (SEMA7A)                                          | 341 |
| Alpha-1-antitrypsin (SERPINA1)                                  | 342 |
| Alpha-1-antichymotrypsin (SERPINA3)                             | 343 |
| Antithrombin-III (SERPINC1)                                     | 344 |
| SH3 domain-binding glutamic acid-rich-like protein (SH3BGRL)    | 345 |
| SH3 domain-binding glutamic acid-rich-like protein 2 (SH3BGRL2) | 346 |
| Urea transporter 1 (SLC14A1)                                    | 347 |
| Monocarboxylate transporter 1 (SLC16A1)                         | 348 |
| Equilibrative nucleoside transporter 1 (SLC29A1)                | 349 |



|                                                                            |     |
|----------------------------------------------------------------------------|-----|
| Solute carrier family 2, facilitated glucose transporter member 1 (SLC2A1) | 350 |
| Zinc transporter 1 (SLC30A1)                                               | 351 |
| Solute carrier family 40 member 1 (SLC40A1)                                | 352 |
| Band 3 anion transport protein (SLC4A1)                                    | 353 |
| Small integral membrane protein 1 (SMIM1)                                  | 354 |
| Alpha-synuclein (SNCA)                                                     | 355 |
| Superoxide dismutase [Cu-Zn] (SOD1)                                        | 356 |
| Sorbitol dehydrogenase (SORD)                                              | 357 |
| Spectrin alpha chain, erythrocytic 1 (SPTA1)                               | 358 |
| Spectrin beta chain, erythrocytic (SPTB)                                   | 359 |
| Sorcin (SRI)                                                               | 360 |
| Hsc70-interacting protein (ST13)                                           | 361 |
| Stress-induced-phosphoprotein 1 (STIP1)                                    | 362 |
| Erythrocyte band 7 integral membrane protein (STOM)                        | 363 |
| Syntaxin-7 (STX7)                                                          | 364 |
| Total antioxidant capacity of the supernatant                              | 365 |
| Uric acid independent antioxidant capacity of the supernatant              | 366 |
| Serine/threonine-protein kinase TAO3 (TAOK3)                               | 367 |
| TBC1 domain family member 24 (TBC1D24)                                     | 368 |
| Tert-butyl hydroperoxide-induced intracellular ROS levels                  | 369 |
| T-complex protein 1 subunit alpha (TCP1)                                   | 370 |
| Serotransferrin (TF)                                                       | 371 |
| Transmembrane emp24 domain-containing protein 2 (TMED2)                    | 372 |
| Transmembrane protein 222 (TMEM222)                                        | 373 |
| Tropomodulin-1 (TMOD1)                                                     | 374 |
| Tensin-1 (TNS1)                                                            | 375 |
| Triosephosphate isomerase (TPI1)                                           | 376 |
| Tropomyosin alpha-1 (TPM1)                                                 | 377 |
| Tripeptidyl-peptidase 2 (TPP2)                                             | 378 |
| Thioredoxin (TXN)                                                          | 379 |
| Uric acid dependent antioxidant capacity of the supernatant                | 380 |
| Ubiquitin-like modifier-activating enzyme 1 (UBA1)                         | 381 |
| Polyubiquitin-B (UBB)                                                      | 382 |
| Ubiquitin-conjugating enzyme E2 N (UBE2N)                                  | 383 |
| E2 ubiquitin-conjugating enzyme (UBE2O)                                    | 384 |
| E3 ubiquitin-protein ligase UBR4 (UBR4)                                    | 385 |
| UBX domain-containing protein 6 (UBXN6)                                    | 386 |
| UDP-glucose:glycoprotein glucosyltransferase 1 (UGGT1)                     | 387 |
| Ubiquitin carboxyl-terminal hydrolase 14 (USP14)                           | 388 |
| Ubiquitin carboxyl-terminal hydrolase 15 (USP15)                           | 389 |
| Ubiquitin carboxyl-terminal hydrolase 5 (USP5)                             | 390 |
| Probable ubiquitin carboxyl-terminal hydrolase FAF-X (USP9X)               | 391 |
| Vesicle-associated membrane protein 3 (VAMP3)                              | 392 |
| Vesicle-associated membrane protein-associated protein A (VAPA)            | 393 |

|                                                          |     |
|----------------------------------------------------------|-----|
| Synaptic vesicle membrane protein VAT-1 homolog (VAT1)   | 394 |
| Transitional endoplasmic reticulum ATPase (VCP)          | 395 |
| EVs Protein Concentration                                | 396 |
| Vacuolar protein sorting-associated protein 13A (VPS13A) | 397 |
| WD repeat-containing protein 81 (WDR81)                  | 398 |
| WD repeat-containing protein 91 (WDR91)                  | 399 |
| Exportin-7 (XPO7)                                        | 400 |
| 14-3-3 protein epsilon (YWHAЕ)                           | 401 |
| 14-3-3 protein zeta/delta (YWHAZ)                        | 402 |
