# Supplementary material for: Proteome of Stored RBC Membrane and Vesicles from Heterozygous Beta Thalassemia Donors
Source: MDPI journal article supplement (doi:10.3390/ijms22073369), 2021-03-25
Supplement: s1 [file s1]

**Supplementary Table S8.** EV hubs prevailing in the biological networks of Figure 10 and Figure 11 and their connectivity to RBC-related parameters.

| <b>A. <math>\beta</math>Thal<sup>+</sup> EVs</b>           | <b>Number of connections<br/>to RBC parameters</b> |
|------------------------------------------------------------|----------------------------------------------------|
| <b>Apolipoproteins</b>                                     | <b>81</b>                                          |
| <b>Hb</b>                                                  | <b>52</b>                                          |
| <b>Small integral membrane protein 1 (SMIM1)</b>           | <b>41</b>                                          |
| <b>Carbonic anhydrase 1</b>                                | <b>36</b>                                          |
| Flavin reductase                                           | 30                                                 |
| Thioredoxin                                                | 30                                                 |
| <b>IgGs</b>                                                | <b>28</b>                                          |
| GTPase activating protein (TBC1D24)                        | 28                                                 |
| <b>Ubiquitin-related</b>                                   | <b>28</b>                                          |
| Fibrinogen                                                 | 26                                                 |
| Sorcin                                                     | 23                                                 |
| Phosphatidylethanolamine-binding protein (PEBP1)           | 22                                                 |
| $\alpha$ -hemoglobin-stabilizing protein (AHSP)            | 21                                                 |
| Peroxiredoxins                                             | 21                                                 |
| Phosphatidylinositol 5P 4-kinase type-2 $\alpha$ (PIP4K2A) | 20                                                 |
| Prothrombin                                                | 18                                                 |
| CD55                                                       | 16                                                 |
| <b>Small GTPases</b>                                       | <b>15</b>                                          |
| <b>B. Control EVs</b>                                      | <b>Number of connections<br/>to RBC parameters</b> |
| <b>Apolipoproteins</b>                                     | <b>40</b>                                          |
| Spectrins                                                  | 38                                                 |
| <b>Ubiquitin-related</b>                                   | <b>29</b>                                          |
| S-formyl-glutathione hydrolase (ESD)                       | 28                                                 |
| <b>Carbonic anhydrase 1</b>                                | <b>27</b>                                          |
| Glycophorin A                                              | 26                                                 |
| <b>IgGs</b>                                                | <b>26</b>                                          |
| <b>Hb</b>                                                  | <b>22</b>                                          |
| Heat shock proteins                                        | 22                                                 |
| <b>Small GTPases</b>                                       | <b>20</b>                                          |
| Calpastatin                                                | 19                                                 |
| Complement                                                 | 18                                                 |
| Inter- $\alpha$ -trypsin inhibitor heavy chain (H4ITI4)    | 18                                                 |
| <b>Small integral membrane protein 1 (SMIM1)</b>           | <b>15</b>                                          |

Bold: high connectivity parameters present in both groups.
