# Supplementary material for: Proteome of Stored RBC Membrane and Vesicles from Heterozygous Beta Thalassemia Donors
Source: MDPI journal article supplement (doi:10.3390/ijms22073369), 2021-03-25
Supplement: s1 [file s1]

|    |                                                                                                               |                  |              | Total Spectrum Count |         |      |      |     |      |                                |      |      |      |     |
|----|---------------------------------------------------------------------------------------------------------------|------------------|--------------|----------------------|---------|------|------|-----|------|--------------------------------|------|------|------|-----|
| #  | Identified Proteins (657)                                                                                     | Accession Number | Alternate ID | Molecular Weight     | Control |      |      |     |      | beta-Thalassemia Heterozygotes |      |      |      |     |
| 1  | Hemoglobin subunit alpha OS=Homo sapiens OX-9606 GN-HBA1 PE=1 SV=2                                            | HBA_HUMAN        | HBA1         | 15 kDa               | 1136    | 1019 | 1171 | 975 | 1324 | 1095                           | 1149 | 1375 | 1324 | 994 |
| 2  | Hemoglobin subunit beta OS=Homo sapiens OX-9606 GN-HBB PE=1 SV=2                                              | HBB_HUMAN        | HBB          | 16 kDa               | 989     | 898  | 990  | 857 | 1154 | 942                            | 939  | 1047 | 1023 | 924 |
| 3  | Serum A202 OS=Homo sapiens OX-9606 GN-ALB1 PE=1 SV=2                                                          | ALBU_HUMAN       | ALB          | 66 kDa               | 4905    | 3170 | 448  | 559 | 559  | 472                            | 472  | 569  | 569  | 344 |
| 4  | Erythrocyte band 7 integral membrane protein OS=Homo sapiens OX-9606 GN-STOM PE=1 SV=3                        | STOM_HUMAN       | STOM         | 32 kDa               | 286     | 230  | 404  | 318 | 480  | 274                            | 274  | 507  | 402  | 235 |
| 5  | Band 3 anion transport protein OS=Homo sapiens OX-9606 GN-SLC4A1 PE=1 SV=3                                    | BSAT_HUMAN       | SLC4A1       | 102 kDa              | 226     | 207  | 302  | 194 | 298  | 213                            | 211  | 492  | 382  | 185 |
| 6  | Ankyrin-1 OS=Homo sapiens OX-9606 GN-ANK1 PE=1 SV=3                                                           | ANK1_HUMAN       | ANK1         | 206 kDa              | 232     | 233  | 230  | 193 | 223  | 223                            | 247  | 268  | 255  | 194 |
| 7  | Transitional endoplasmic reticulum ATPase OS=Homo sapiens OX-9606 GN-VCP PE=1 SV=4                            | TERA_HUMAN       | VCP          | 89 kDa               | 183     | 173  | 202  | 187 | 193  | 180                            | 175  | 220  | 190  | 182 |
| 8  | Carbonic dehydratase 1 OS=Homo sapiens OX-9606 GN-CA1 PE=1 SV=2                                               | CA1_HUMAN        | CA1          | 29 kDa               | 140     | 119  | 174  | 145 | 174  | 141                            | 141  | 175  | 165  | 143 |
| 9  | Peroxiredoxin-2 OS=Homo sapiens OX-9606 GN-PRDX2 PE=1 SV=5                                                    | PRDX2_HUMAN      | PRDX2        | 22 kDa               | 87      | 78   | 190  | 120 | 167  | 136                            | 107  | 246  | 227  | 87  |
| 10 | Hemoglobin subunit delta OS=Homo sapiens OX-9606 GN-HBD PE=1 SV=2                                             | HBD_HUMAN        | HBD          | 16 kDa               | 538     | 502  | 533  | 484 | 579  | 558                            | 547  | 561  | 544  | 532 |
| 11 | Serotransferrin OS=Homo sapiens OX-9606 GN-TF PE=1 SV=3                                                       | TRFE_HUMAN       | TF           | 77 kDa               | 119     | 99   | 152  | 113 | 87   | 139                            | 68   | 123  | 82   | 137 |
| 12 | Catalase OS=Homo sapiens OX-9606 GN-CAT PE=1 SV=3                                                             | CAT_HUMAN        | CAT          | 60 kDa               | 95      | 87   | 97   | 88  | 159  | 108                            | 96   | 143  | 134  | 107 |
| 13 | Protein A.I. OS=Homo sapiens OX-9606 GN-EPBA1 PE=1 SV=4                                                       | EPBA1_HUMAN      | KRT1         | 97 kDa               | 68      | 67   | 81   | 65  | 62   | 61                             | 112  | 136  | 57   | 57  |
| 14 | Hemoglobin subunit gamma 1 OS=Homo sapiens OX-9606 GN-HBG1 PE=1 SV=2                                          | HBG1_HUMAN       | HBG1         | 16 kDa               | 197     | 185  | 165  | 167 | 246  | 239                            | 268  | 253  | 218  | 208 |
| 15 | Flavin reductase (NADPH) OS=Homo sapiens OX-9606 GN-BLVRB PE=1 SV=3                                           | BLVRB_HUMAN      | BLVRB        | 22 kDa               | 76      | 65   | 99   | 78  | 78   | 96                             | 107  | 149  | 87   | 87  |
| 16 | Erythrocyte membrane protein band 4.2 OS=Homo sapiens OX-9606 GN-EPB42 PE=1 SV=3                              | EPB42_HUMAN      | EPB42        | 77 kDa               | 59      | 58   | 79   | 33  | 80   | 49                             | 50   | 136  | 97   | 44  |
| 17 | Immunoglobulin heavy constant mu OS=Homo sapiens OX-9606 GN-IGHM PE=1 SV=4                                    | IGHM_HUMAN       | IGHM         | 49 kDa               | 101     | 72   | 65   | 111 | 46   | 70                             | 112  | 52   | 33   | 78  |
| 18 | Carbonic anhydrase 2 OS=Homo sapiens OX-9606 GN-CA2 PE=1 SV=2                                                 | CA2_HUMAN        | CA2          | 29 kDa               | 75      | 62   | 62   | 65  | 74   | 82                             | 75   | 103  | 77   | 70  |
| 19 | Complement C3 OS=Homo sapiens OX-9606 GN-C3 PE=1 SV=2                                                         | C3_HUMAN         | C3           | 187 kDa              | 114     | 99   | 121  | 47  | 36   | 66                             | 66   | 49   | 49   | 49  |
| 20 | Solute carrier family 2, facilitated glucose transporter member 1 OS=Homo sapiens OX-9606 GN-SLC2A1 PE=1 SV=2 | GTR1_HUMAN       | SLC2A1       | 54 kDa               | 37      | 37   | 57   | 32  | 110  | 40                             | 38   | 141  | 126  | 30  |
| 21 | Keratin, type I cytoskeletal 10 OS=Homo sapiens OX-9606 GN-KRT10 PE=1 SV=6                                    | K1C10_HUMAN      | KRT10        | 59 kDa               | 123     | 55   | 47   | 69  | 22   | 78                             | 73   | 52   | 66   | 68  |
| 22 | Keratin, type I cytoskeletal 9 OS=Homo sapiens OX-9606 GN-KRT9 PE=1 SV=3                                      | K1C9_HUMAN       | KRT9         | 62 kDa               | 68      | 59   | 40   | 55  | 27   | 69                             | 74   | 51   | 102  | 72  |
| 23 | 55 kDa erythrocyte membrane protein OS=Homo sapiens OX-9606 GN-MMP1 PE=1 SV=2                                 | EM55_HUMAN       | MMP1         | 52 kDa               | 62      | 61   | 68   | 52  | 58   | 58                             | 57   | 71   | 88   | 49  |
| 24 | Keratin, type II cytoskeletal 1 OS=Homo sapiens OX-9606 GN-KRT1 PE=1 SV=6                                     | K2C1_HUMAN       | KRT1         | 56 kDa               | 85      | 67   | 51   | 51  | 51   | 62                             | 47   | 88   | 77   | 77  |
| 25 | Heat shock cognate 71 kDa protein OS=Homo sapiens OX-9606 GN-HSPAB PE=1 SV=1                                  | HSP7C_HUMAN      | HSPAB        | 71 kDa               | 49      | 64   | 59   | 58  | 50   | 57                             | 75   | 63   | 51   | 54  |
| 26 | Methanethiol oxidase OS=Homo sapiens OX-9606 GN-SELENBP1 PE=1 SV=2                                            | SELENBP1_HUMAN   | SELENBP1     | 52 kDa               | 44      | 42   | 48   | 42  | 58   | 57                             | 50   | 46   | 56   | 59  |
| 27 | Fibrinogen gamma chain OS=Homo sapiens OX-9606 GN-FGG PE=1 SV=3                                               | FIBG_HUMAN       | FGG          | 52 kDa               | 57      | 60   | 27   | 30  | 23   | 37                             | 38   | 18   | 27   | 90  |
| 28 | Immunoglobulin gamma 1 heavy chain OS=Homo sapiens OX-9606 GN-GD12 PE=1 SV=2                                  | IGG1_HUMAN       | IGG1         | 49 kDa               | 62      | 48   | 61   | 62  | 34   | 48                             | 43   | 40   | 46   | 39  |
| 29 | Peroxiredoxin-6 OS=Homo sapiens OX-9606 GN-PRDX6 PE=1 SV=3                                                    | PRDX6_HUMAN      | PRDX6        | 25 kDa               | 46      | 37   | 56   | 39  | 64   | 50                             | 53   | 67   | 47   | 47  |
| 30 | Apolipoprotein B-100 OS=Homo sapiens OX-9606 GN-APOB PE=1 SV=2                                                | APOB_HUMAN       | APOB         | 516 kDa              | 77      | 67   | 64   | 56  | 28   | 6                              | 87   | 68   | 2    | 3   |
| 31 | Flotillin-1 OS=Homo sapiens OX-9606 GN-FLOT1 PE=1 SV=3                                                        | FLOT1_HUMAN      | FLOT1        | 47 kDa               | 32      | 30   | 59   | 20  | 37   | 66                             | 36   | 57   | 33   | 67  |
| 32 | Spectrin alpha chain, erythrocytic 1 OS=Homo sapiens OX-9606 GN-SPTA1 PE=1 SV=5                               | SPTA1_HUMAN      | SPTA1        | 280 kDa              | 62      | 50   | 22   | 9   | 27   | 46                             | 40   | 56   | 26   | 79  |
| 33 | Rab GDP dissociation inhibitor beta OS=Homo sapiens OX-9606 GN-GDI2 PE=1 SV=2                                 | GDIB_HUMAN       | GDI2         | 51 kDa               | 41      | 32   | 45   | 23  | 51   | 45                             | 36   | 46   | 52   | 37  |
| 34 | Heat shock 70 kDa protein 1A OS=Homo sapiens OX-9606 GN-HSPA1A PE=1 SV=1                                      | HSPA1A_HUMAN     | HSPA1A       | 70 kDa               | 30      | 29   | 30   | 24  | 32   | 72                             | 50   | 29   | 54   | 29  |
| 35 | Glyceraldehyde-3-phosphate dehydrogenase OS=Homo sapiens OX-9606 GN-GAPDH PE=1 SV=3                           | G3P_HUMAN        | GAPDH        | 36 kDa               | 27      | 30   | 30   | 24  | 37   | 38                             | 44   | 35   | 45   | 40  |
| 36 | Alpha-1-antitrypsin OS=Homo sapiens OX-9606 GN-SERPINA1 PE=1 SV=3                                             | ALAT_HUMAN       | SERPINA1     | 47 kDa               | 29      | 37   | 58   | 43  | 41   | 31                             | 24   | 47   | 39   | 31  |
| 37 | Apolipoprotein A-I OS=Homo sapiens OX-9606 GN-APOA1 PE=1 SV=1                                                 | APOA1_HUMAN      | APOA1        | 31 kDa               | 53      | 44   | 45   | 45  | 29   | 38                             | 31   | 36   | 32   | 39  |
| 38 | Ras-related protein Rap-1A OS=Homo sapiens OX-9606 GN-RAP1A PE=1 SV=1                                         | RAP1A_HUMAN      | RAP1A        | 21 kDa               | 24      | 24   | 24   | 27  | 25   | 41                             | 36   | 90   | 23   | 37  |
| 39 | Haptoglobin OS=Homo sapiens OX-9606 GN-HIP PE=1 SV=1                                                          | HPT_HUMAN        | HPT          | 45 kDa               | 38      | 31   | 51   | 20  | 37   | 20                             | 27   | 39   | 32   | 32  |
| 40 | Acetylcholinesterase OS=Homo sapiens OX-9606 GN-AChE PE=1 SV=1                                                | ACHE_HUMAN       | ACHE         | 68 kDa               | 26      | 30   | 35   | 34  | 46   | 27                             | 21   | 38   | 29   | 21  |
| 41 | Keratin, type II cytoskeletal 2 epidermal OS=Homo sapiens OX-9606 GN-KRT2 PE=1 SV=2                           | KRT2_HUMAN       | KRT2         | 65 kDa               | 72      | 31   | 29   | 37  | 5    | 36                             | 37   | 18   | 27   | 40  |
| 42 | Immunoglobulin heavy constant alpha 1 OS=Homo sapiens OX-9606 GN-IGHA1 PE=1 SV=2                              | IGHA1_HUMAN      | IGHA1        | 38 kDa               | 39      | 43   | 28   | 37  | 18   | 23                             | 33   | 42   | 36   | 30  |
| 43 | Purine nucleoside phosphorylase OS=Homo sapiens OX-9606 GN-PNP PE=1 SV=2                                      | PNPH_HUMAN       | PNP          | 32 kDa               | 22      | 27   | 43   | 27  | 38   | 29                             | 42   | 21   | 45   | 32  |
| 44 | Hemopexin OS=Homo sapiens OX-9606 GN-HPX PE=1 SV=2                                                            | HEMO_HUMAN       | HEMO         | 52 kDa               | 35      | 29   | 44   | 32  | 26   | 27                             | 15   | 37   | 24   | 29  |
| 45 | Delta-aminolevulinic acid dehydratase OS=Homo sapiens OX-9606 GN-ALAD PE=1 SV=1                               | HEMD_HUMAN       | ALAD         | 36 kDa               | 29      | 25   | 29   | 19  | 16   | 38                             | 38   | 38   | 26   | 26  |
| 46 | Moesin OS=Homo sapiens OX-9606 GN-MSN PE=1 SV=3                                                               | MOES_HUMAN       | MSN          | 68 kDa               | 38      | 21   | 26   | 28  | 12   | 33                             | 35   | 28   | 18   | 29  |
| 47 | Complement C4-B OS=Homo sapiens OX-9606 GN-C4B PE=1 SV=2                                                      | CO4B_HUMAN       | C4B          | 193 kDa              | 37      | 28   | 48   | 30  | 20   | 14                             | 23   | 30   | 12   | 26  |
| 48 | Actin, cytoplasmic 2 OS=Homo sapiens OX-9606 GN-ACTG1 PE=1 SV=1                                               | ACTG1_HUMAN      | ACTG1        | 42 kDa               | 30      | 41   | 25   | 11  | 17   | 34                             | 39   | 29   | 22   | 29  |
| 49 | Phosphoglycerate kinase 1 OS=Homo sapiens OX-9606 GN-PGK1 PE=1 SV=3                                           | PGK1_HUMAN       | PGK1         | 45 kDa               | 20      | 26   | 23   | 26  | 21   | 30                             | 31   | 27   | 22   | 22  |
| 50 | Alpha-2-macroglobulin OS=Homo sapiens OX-9606 GN-A2M PE=1 SV=2                                                | A2M_HUMAN        | A2M          | 163 kDa              | 69      | 49   | 56   | 42  | 16   | 6                              | 19   | 20   | 20   | 9   |
| 51 | Alpha-soluble NSF attachment protein OS=Homo sapiens OX-9606 GN-NAPA PE=1 SV=3                                | SNA_M_HUMAN      | NAPA         | 33 kDa               | 22      | 18   | 20   | 16  | 36   | 36                             | 17   | 44   | 26   | 31  |
| 52 | Spectrin beta chain, erythrocytic OS=Homo sapiens OX-9606 GN-SPTB PE=1 SV=5                                   | SPTB1_HUMAN      | SPTB         | 246 kDa              | 26      | 24   | 19   | 2   | 28   | 24                             | 12   | 33   | 15   | 39  |
| 53 | Flotillin-2 OS=Homo sapiens OX-9606 GN-FLOT2 PE=1 SV=2                                                        | FLOT2_HUMAN      | FLOT2        | 47 kDa               | 16      | 19   | 33   | 15  | 36   | 37                             | 19   | 46   | 30   | 37  |
| 54 | ADP-ribosylation factor 1 OS=Homo sapiens OX-9606 GN-ARF1 PE=1 SV=2                                           | ARF1_HUMAN       | ARF1         | 21 kDa               | 23      | 25   | 30   | 22  | 40   | 19                             | 20   | 39   | 38   | 22  |
| 55 | Peptidyl-prolyl cis-trans isomerase A OS=Homo sapiens OX-9606 GN-PPIA PE=1 SV=2                               | PPIA_HUMAN       | PPIA         | 18 kDa               | 27      | 30   | 19   | 28  | 19   | 26                             | 24   | 28   | 28   | 23  |
| 56 | Heat shock protein HSP 90-alpha OS=Homo sapiens OX-9606 GN-HSP90AA1 PE=1 SV=5                                 | HSP90A_HUMAN     | HSP90AA1     | 85 kDa               | 22      | 22   | 21   | 23  | 14   | 40                             | 41   | 26   | 11   | 38  |
| 57 | Triosephosphate isomerase OS=Homo sapiens OX-9606 GN-TPI1 PE=1 SV=3                                           | TPI1_HUMAN       | TPI1         | 31 kDa               | 22      | 23   | 25   | 26  | 20   | 29                             | 29   | 22   | 25   | 32  |
| 58 | Semaphorin-7A OS=Homo sapiens OX-9606 GN-SEMA7A PE=1 SV=1                                                     | SEMA7A_HUMAN     | SEMA7A       | 75 kDa               | 28      | 17   | 28   | 27  | 24   | 32                             | 11   | 22   | 19   | 28  |
| 59 | Immunoglobulin heavy constant gamma 2 OS=Homo sapiens OX-9606 GN-IGHG2 PE=1 SV=2                              | IGHG2_HUMAN      | IGHG2        | 36 kDa               | 68      | 42   | 67   | 59  | 19   | 46                             | 35   | 39   | 23   | 41  |
| 60 | Guanine nucleotide-binding protein G(I)/G(S)/G(T) subunit beta-1 OS=Homo sapiens OX-9606 GN-GNB1 PE=1 SV=3    | GNB1_HUMAN       | GNB1         | 37 kDa               | 21      | 21   | 22   | 16  | 23   | 16                             | 23   | 21   | 27   | 23  |
| 61 | Vesicle-fusing ATPase OS=Homo sapiens OX-9606 GN-NSF PE=1 SV=3                                                | NSF_HUMAN        | NSF          | 83 kDa               | 15      | 20   | 26   | 19  | 7    | 29                             | 29   | 20   | 12   | 12  |
| 62 | Fructose-bisphosphate aldolase A OS=Homo sapiens OX-9606 GN-ALDOA PE=1 SV=2                                   | ALDOA_HUMAN      | ALDOA        | 39 kDa               | 22      | 27   | 24   | 22  | 19   | 30                             | 31   | 21   | 26   | 26  |
| 63 | 14-3-3 protein epsilon OS=Homo sapiens OX-9606 GN-YWHAE PE=1 SV=1                                             | 1433E_HUMAN      | YWHAE        | 29 kDa               | 16      | 17   | 15   | 19  | 23   | 31                             | 20   | 21   | 26   | 28  |
| 64 | Immunoglobulin kappa light chain OS=Homo sapiens OX-9606 PE=1 SV=1                                            | IGK_HUMAN        | IGK          | 23 kDa               | 31      | 25   | 25   | 32  | 22   | 17                             | 22   | 29   | 26   | 23  |
| 65 | Retinal dehydrogenase 1 OS=Homo sapiens OX-9606 GN-ALDH1A1 PE=1 SV=2                                          | ALDH1A1_HUMAN    | ALDH1A1      | 55 kDa               | 20      | 19   | 24   | 22  | 21   | 24                             | 20   | 24   | 23   | 21  |
| 66 | Programmed cell death 6-interacting protein OS=Homo sapiens OX-9606 GN-PDCD6IP PE=1 SV=1                      | PDC6I_HUMAN      | PDCD6IP      | 96 kDa               | 16      | 4    | 32   | 8   | 22   | 34                             | 8    | 21   | 11   | 36  |
| 67 | L-lactate dehydrogenase B chain OS=Homo sapiens OX-9606 GN-LDHB PE=1 SV=2                                     | LDHB_HUMAN       | LDHB         | 37 kDa               | 15      | 18   | 15   | 12  | 33   | 21                             | 14   | 26   | 29   | 10  |
| 68 | Beta-2-glycoprotein 1 OS=Homo sapiens OX-9606 GN-APOH PE=1 SV=3                                               | APOH_HUMAN       | APOH         | 38 kDa               | 22      | 22   | 23   | 22  | 29   | 17                             | 15   | 15   | 14   | 15  |
| 69 | Guanine nucleotide-binding protein G(I) subunit alpha-2 OS=Homo sapiens OX-9606 GN-GNAI2 PE=1 SV=3            | GNAI2_HUMAN      | GNAI2        | 40 kDa               | 11      | 18   | 28   | 13  | 35   | 19                             | 12   | 26   | 23   | 19  |
| 70 | Glycophorin-A OS=Homo sapiens OX-9606 GN-GYP A PE=1 SV=2                                                      | GLP A_HUMAN      | GYP A        | 16 kDa               | 22      | 15   | 16   | 18  | 21   | 16                             | 17   | 23   | 20   | 20  |
| 71 | Dishevelled-associated activator of morphogenesis 1 OS=Homo sapiens OX-9606 GN-DAAI1 PE=1 SV=2                | DAAI1_HUMAN      | DAAI1        | 123 kDa              | 10      | 15   | 24   | 8   | 33   | 19                             | 10   | 33   | 26   | 18  |
| 72 | Ras-related protein Rap-2b OS=Homo sapiens OX-9606 GN-RAP2B PE=1 SV=1                                         | RAP2B_HUMAN      | RAP2B        | 21 kDa               | 16      | 20   | 22   | 18  | 17   | 20                             | 16   | 33   | 20   | 17  |
| 73 | Annexin A7 OS=Homo sapiens OX-9606 GN-ANXA7 PE=1 SV=3                                                         | ANXA7_HUMAN      | ANXA7        | 53 kDa               | 26      | 12   | 17   | 20  | 11   | 42                             | 12   | 17   | 8    | 28  |
| 74 | Bisphosphoglycerate mutase OS=Homo sapiens OX-9606 GN-BPGM PE=1 SV=2                                          | BPGM_HUMAN       | BPGM         | 30 kDa               | 17      | 22   | 18   | 21  | 22   | 21                             | 17   | 25   | 24   | 15  |
| 75 | UBX domain-containing protein 6 OS=Homo sapiens OX-9606 GN-UBXN6 PE=1 SV=1                                    | UBXN6_HUMAN      | UBXN6        | 19 kDa               | 19      | 20   | 28   | 18  | 17   | 20                             | 18   | 25   | 8    | 24  |
| 76 | Radiol 5 OS=Homo sapiens OX-9606 GN-RDX PE=1 SV=1                                                             | RDX_HUMAN        | RDX          | 69 kDa               | 29      | 21   | 20   | 30  | 31   | 25                             | 30   | 31   | 21   | 25  |
| 77 | UV excision repair protein RAD23 homolog 4 OS=Homo sapiens OX-9606 GN-RAD23A PE=1 SV=1                        | RD23A_HUMAN      | RAD23A       | 40 kDa               | 6       | 8    | 19   | 13  | 29   | 12                             | 13   | 30   | 31   | 11  |
| 78 | Stress-induced-phosphoprotein 1 OS=Homo sapiens OX-9606 GN-STIP1 PE=1 SV=1                                    | STIP1_HUMAN      | STIP1        | 63 kDa               | 19      | 19   | 16   | 18  | 12   | 22                             | 26   | 16   | 12   | 25  |
| 79 | Eukaryotic translation initiation factor 5A-1 OS=Homo sapiens OX-9606 GN-EIF5A PE=1 SV=2                      | IF5A_HUMAN       | EIF5A        | 17 kDa               | 13      | 14   | 17   | 13  | 20   | 20                             | 19   | 29   | 22   | 14  |
| 80 | Transferin receptor protein 1 OS=Homo sapiens OX-9606 GN-TRPC PE=1 SV=2                                       | TRPC_HUMAN       | TRPC         | 85 kDa               | 12      | 12   | 17   | 5   | 23   | 23                             | 23   | 63   | 27   | 43  |
| 81 | Cell division control protein 42 homolog OS=Homo sapiens OX-9606 GN-CDK42 PE=1 SV=2                           | CDK42_HUMAN      | CDK42        | 21 kDa               | 14      | 14   | 19   | 14  | 27   | 19                             | 27   | 19   | 20   | 19  |
| 82 | Blood group RH(Cc) polypeptide OS=Homo sapiens OX-9606 GN-RHCE PE=1 SV=2                                      | RHCE_HUMAN       | RHCE         | 46 kDa               | 13      | 17   | 20   | 9   | 26   | 16                             | 16   | 24   | 32   | 11  |
| 83 | Adenylate kinase isoenzyme 1 OS=Homo sapiens OX-9606 GN-AKI1 PE=1 SV=3                                        | AKI1_HUMAN       | AKI1         | 22 kDa               | 15      | 18   | 18   | 17  | 20   | 21                             | 17   | 23   | 21   | 14  |
| 84 | Complement decay-accelerating factor OS=Homo sapiens OX-9606 GN-CD55 PE=1 SV=4                                | DA               |              |                      |         |      |      |     |      |                                |      |      |      |     |

|     |                                                                                                                                |                  |          |         |    |    |    |    |    |    |    |    |    |    |
|-----|--------------------------------------------------------------------------------------------------------------------------------|------------------|----------|---------|----|----|----|----|----|----|----|----|----|----|
| 100 | Protein/nucleic acid deglycase D1-1 OS=Homo sapiens OX=9606 GN=PAK7 PE=1 SV=2                                                  | PARK7_HUMAN      | PARK7    | 20 kDa  | 15 | 12 | 14 | 13 | 15 | 14 | 14 | 15 | 13 | 13 |
| 101 | Golgi-associated plant pathogenesis-related protein 1 OS=Homo sapiens OX=9606 GN=GLIPR2 PE=1 SV=3                              | GAPR1_HUMAN      | GLIPR2   | 17 kDa  | 12 | 11 | 13 | 11 | 16 | 16 | 9  | 10 | 15 | 16 |
| 102 | Alpha-enolase OS=Homo sapiens OX=9606 GN=ENO1 PE=1 SV=2                                                                        | ENO4_HUMAN       | ENO1     | 47 kDa  | 10 | 8  | 17 | 10 | 7  | 12 | 17 | 12 | 9  | 16 |
| 103 | Porphyobilinogen desaminase OS=Homo sapiens OX=9606 GN=HMB5 PE=1 SV=2                                                          | HENK3_HUMAN      | HMB5     | 39 kDa  | 8  | 2  | 11 | 10 | 8  | 21 | 14 | 15 | 6  | 21 |
| 104 | Cofilin-1 OS=Homo sapiens OX=9606 GN=CFL1 PE=1 SV=3                                                                            | COF1_HUMAN       | CFL1     | 19 kDa  | 15 | 14 | 12 | 8  | 16 | 13 | 14 | 17 | 8  | 15 |
| 105 | 2',3'-cyclic-nucleotide 3'-phosphodiesterase OS=Homo sapiens OX=9606 GN=CNP PE=1 SV=2                                          | CNP3_HUMAN       | CNP      | 48 kDa  | 13 | 10 | 21 | 14 | 23 | 14 | 8  | 9  | 16 | 8  |
| 106 | Fibrinogen alpha chain OS=Homo sapiens OX=9606 GN=FGA PE=1 SV=2                                                                | FIBA_HUMAN       | FGA      | 95 kDa  | 16 | 21 | 21 | 11 | 4  | 5  | 8  | 5  | 7  | 17 |
| 107 | Alpha-1-acid glycoprotein 2 OS=Homo sapiens OX=9606 GN=ORM2 PE=1 SV=2                                                          | A1AG2_HUMAN      | ORM2     | 24 kDa  | 18 | 17 | 21 | 17 | 11 | 15 | 7  | 7  | 14 | 19 |
| 108 | Transforming protein rhoA OS=Homo sapiens OX=9606 GN=RHDA PE=1 SV=1                                                            | RHOA_HUMAN       | RHOA     | 22 kDa  | 13 | 13 | 8  | 11 | 14 | 11 | 14 | 8  | 10 | 18 |
| 109 | Alpha-2-HS-glycoprotein OS=Homo sapiens OX=9606 GN=AHSG PE=1 SV=2                                                              | FETUA_HUMAN      | AHSG     | 39 kDa  | 17 | 11 | 16 | 6  | 9  | 11 | 8  | 16 | 11 | 13 |
| 110 | Ribonuclease inhibitor OS=Homo sapiens OX=9606 GN=RNH1 PE=1 SV=2                                                               | RNH_HUMAN        | RNH1     | 50 kDa  | 12 | 11 | 14 | 12 | 16 | 12 | 10 | 15 | 13 | 10 |
| 111 | Serine/threonine-protein kinase TAO3 OS=Homo sapiens OX=9606 GN=TAO3 PE=1 SV=2                                                 | TAO3_HUMAN       | TAO3     | 105 kDa | 8  | 5  | 13 | 5  | 10 | 19 | 11 | 17 | 8  | 22 |
| 112 | Long-chain-fatty-acid-CoA ligase 4 OS=Homo sapiens OX=9606 GN=ACSL4 PE=1 SV=2                                                  | ACSL4_HUMAN      | ACSL4    | 79 kDa  | 11 | 8  | 13 | 11 | 17 | 16 | 8  | 15 | 19 | 9  |
| 113 | Eh domain-containing protein 1 OS=Homo sapiens OX=9606 GN=EHD1 PE=1 SV=2                                                       | EHD1_HUMAN       | EHD1     | 65 kDa  | 5  | 5  | 12 | 5  | 8  | 14 | 9  | 15 | 5  | 14 |
| 114 | Calpastatin OS=Homo sapiens OX=9606 GN=CAST PE=1 SV=4                                                                          | ICAL_HUMAN       | CAST     | 77 kDa  | 9  | 9  | 15 | 13 | 16 | 16 | 14 | 7  | 7  | 27 |
| 115 | Hsc70-interacting protein OS=Homo sapiens OX=9606 GN=ST13 PE=1 SV=2                                                            | F10A1_HUMAN      | ST13     | 41 kDa  | 14 | 15 | 9  | 12 | 6  | 11 | 18 | 12 | 11 | 17 |
| 116 | CB1 cannabinoid receptor-interacting protein 1 OS=Homo sapiens OX=9606 GN=CNRP1 PE=1 SV=1                                      | CNRP1_HUMAN      | CNRP1    | 19 kDa  | 11 | 12 | 11 | 12 | 16 | 7  | 12 | 19 | 17 | 9  |
| 117 | Immunoglobulin kappa constant OS=Homo sapiens OX=9606 GN=IGKC PE=1 SV=2                                                        | IGKC_HUMAN       | IGKC     | 12 kDa  | 40 | 34 | 39 | 43 | 27 | 30 | 12 | 12 | 38 | 9  |
| 118 | Antithrombin-III OS=Homo sapiens OX=9606 GN=SERPINC1 PE=1 SV=1                                                                 | ANTT_HUMAN       | SERPINC1 | 53 kDa  | 18 | 16 | 12 | 16 | 4  | 12 | 3  | 14 | 8  | 9  |
| 119 | 14-3-3 protein zeta/delta OS=Homo sapiens OX=9606 GN=YWHAZ PE=1 SV=1                                                           | YWHAZ_HUMAN      | YWHAZ    | 28 kDa  | 20 | 21 | 11 | 12 | 14 | 20 | 12 | 16 | 5  | 19 |
| 120 | Guanine nucleotide-binding protein G(i) subunit alpha OS=Homo sapiens OX=9606 GN=GNAI3 PE=1 SV=3                               | GNAI3_HUMAN      | GNAI3    | 41 kDa  | 16 | 19 | 27 | 22 | 34 | 23 | 15 | 24 | 22 | 14 |
| 121 | Immunoglobulin lambda-1 light chain OS=Homo sapiens OX=9606 PE=1 SV=1                                                          | IGL1_HUMAN (+1)  |          | 23 kDa  | 18 | 13 | 10 | 17 | 7  | 11 | 12 | 7  | 9  | 6  |
| 122 | Talin-1 OS=Homo sapiens OX=9606 GN=TLN1 PE=1 SV=3                                                                              | TLN1_HUMAN       | TLN1     | 270 kDa | 6  | 44 | 4  |    | 7  | 7  | 17 | 14 | 7  | 6  |
| 123 | Alpha-synuclein OS=Homo sapiens OX=9606 GN=SNCA PE=1 SV=1                                                                      | SYUA_HUMAN       | SNCA     | 14 kDa  | 15 | 13 | 13 | 15 | 10 | 19 | 14 | 7  | 11 | 15 |
| 124 | Eh domain-binding protein 1-like protein 1 OS=Homo sapiens OX=9606 GN=EHPB11 PE=1 SV=2                                         | EHPB11_HUMAN     | EHPB11   | 162 kDa | 5  | 8  | 12 | 9  | 16 | 7  | 12 | 16 | 3  | 15 |
| 125 | Sorcin OS=Homo sapiens OX=9606 GN=SR1 PE=1 SV=1                                                                                | SRI_HUMAN        | SORCN    | 22 kDa  | 8  | 3  |    | 9  | 10 | 29 | 6  | 17 | 9  | 19 |
| 126 | Fibrinogen beta chain OS=Homo sapiens OX=9606 GN=FBG PE=1 SV=2                                                                 | FIBB_HUMAN       | FBG      | 56 kDa  | 20 | 21 | 14 | 2  | 4  | 6  | 12 | 5  | 5  | 11 |
| 127 | Clathrin heavy chain 1 OS=Homo sapiens OX=9606 GN=CLTC PE=1 SV=5                                                               | CLH1_HUMAN       | CLTC     | 192 kDa | 16 | 3  | 24 | 25 | 43 | 3  |    | 9  | 10 | 10 |
| 128 | Guanine nucleotide-binding protein G(i)(G)/G(q)(G12) subunit beta-2 OS=Homo sapiens OX=9606 GN=GNB2 PE=1 SV=3                  | GNB2_HUMAN       | GNB2     | 37 kDa  | 20 | 23 | 22 | 24 | 14 | 32 | 25 | 24 | 12 | 29 |
| 129 | CD5 antigen-like OS=Homo sapiens OX=9606 GN=CD5L PE=1 SV=1                                                                     | CD5L_HUMAN       | CD5L     | 38 kDa  | 16 | 13 | 13 | 14 | 24 | 18 | 15 | 14 | 14 | 14 |
| 130 | Nucleoside diphosphate kinase A OS=Homo sapiens OX=9606 GN=NME1 PE=1 SV=1                                                      | NOKA_HUMAN       | NME1     | 17 kDa  | 8  | 9  | 13 |    | 9  | 11 | 13 | 4  | 9  | 11 |
| 131 | RuvB-like 1 OS=Homo sapiens OX=9606 GN=RUVBL1 PE=1 SV=1                                                                        | RUVB1_HUMAN      | RUVBL1   | 50 kDa  | 7  | 9  | 9  | 7  | 4  | 9  | 23 | 15 | 16 | 10 |
| 132 | Ubiquitin carboxyl-terminal hydrolase 14 OS=Homo sapiens OX=9606 GN=USP14 PE=1 SV=3                                            | USP14_HUMAN      | USP14    | 56 kDa  | 11 | 9  | 7  |    | 14 | 12 | 10 | 13 | 11 | 14 |
| 133 | Hypoxanthine-guanine phosphoribosyltransferase OS=Homo sapiens OX=9606 GN=HPR1 PE=1 SV=2                                       | HPRT_HUMAN       | HPRT1    | 25 kDa  | 10 | 9  | 11 | 12 | 11 | 15 | 13 | 10 | 12 | 11 |
| 134 | Inter-alpha tryptin inhibitor heavy chain H4 OS=Homo sapiens OX=9606 GN=ITIH4 PE=1 SV=4                                        | ITIH4_HUMAN      | ITIH4    | 45 kDa  | 11 | 17 | 8  | 16 | 4  | 16 | 10 | 9  | 3  | 15 |
| 135 | Protein arginase-2 OS=Homo sapiens OX=9606 GN=AGO2 PE=1 SV=3                                                                   | AGO2_HUMAN       | AGO2     | 97 kDa  | 8  | 3  |    |    | 5  | 11 | 4  | 10 | 13 | 10 |
| 136 | Phosphatidylethanolamine-binding protein 1 OS=Homo sapiens OX=9606 GN=PEBP1 PE=1 SV=3                                          | PEBP1_HUMAN      | PEBP1    | 21 kDa  | 13 | 10 | 10 | 13 | 10 | 11 | 12 | 14 | 11 | 7  |
| 137 | Protein-L-isoaspartate(D-aspartate) O-methyltransferase OS=Homo sapiens OX=9606 GN=PCMT1 PE=1 SV=4                             | P1MT_HUMAN       | PCMT1    | 25 kDa  | 17 | 11 | 10 | 15 | 8  | 17 | 15 | 7  | 8  | 13 |
| 138 | Heme-binding protein 1 OS=Homo sapiens OX=9606 GN=HEBP1 PE=1 SV=1                                                              | HEBP1_HUMAN      | HEBP1    | 21 kDa  | 6  | 8  | 14 | 10 | 10 | 15 | 8  | 11 | 2  | 18 |
| 139 | Galectin-3 OS=Homo sapiens OX=9606 GN=GAL3 PE=1 SV=5                                                                           | LEC3_HUMAN       | LEC3     | 15 kDa  | 10 | 7  | 15 | 10 | 16 | 10 |    | 8  | 12 | 15 |
| 140 | Synaptic vesicle membrane protein VAT-1 homolog OS=Homo sapiens OX=9606 GN=VAT1 PE=1 SV=2                                      | VAT1_HUMAN       | VAT1     | 42 kDa  | 4  | 4  |    | 27 | 9  | 8  | 20 | 2  | 8  | 12 |
| 141 | Carbonic anhydrase 3 OS=Homo sapiens OX=9606 GN=CA3 PE=1 SV=3                                                                  | CAH3_HUMAN       | CA3      | 30 kDa  | 19 | 5  | 6  |    | 4  | 16 | 6  | 7  | 6  | 6  |
| 142 | Charged multivesicular body protein 4b OS=Homo sapiens OX=9606 GN=CHMP4B PE=1 SV=1                                             | CHMB4B_HUMAN     | CHMP4B   | 25 kDa  | 11 | 8  | 8  | 14 | 5  | 18 | 9  | 11 | 3  | 23 |
| 143 | Complement factor H OS=Homo sapiens OX=9606 GN=CFH PE=1 SV=4                                                                   | CFAH_HUMAN       | CFH      | 139 kDa | 12 | 7  |    |    | 3  |    |    |    | 4  |    |
| 144 | Protein D011 homolog 2 OS=Homo sapiens OX=9606 GN=DDI2 PE=1 SV=1                                                               | DDI2_HUMAN       | DDI2     | 45 kDa  | 7  |    | 11 | 11 | 10 | 9  | 12 | 9  | 10 | 11 |
| 145 | Malate dehydrogenase, cytoplasmic OS=Homo sapiens OX=9606 GN=MDH1 PE=1 SV=4                                                    | MDHC_HUMAN       | MDH1     | 36 kDa  | 10 | 10 |    | 16 | 8  | 12 | 12 | 7  | 15 | 17 |
| 146 | GTP-binding nuclear protein Ran OS=Homo sapiens OX=9606 GN=GAN PE=1 SV=3                                                       | RAN_HUMAN        | RAN      | 24 kDa  | 8  | 13 | 8  | 10 | 7  | 11 | 14 | 6  | 4  | 9  |
| 147 | GTPase KRas OS=Homo sapiens OX=9606 GN=KRAS PE=1 SV=1                                                                          | KRAS_HUMAN       | KRAS     | 22 kDa  | 8  | 7  | 11 | 8  | 14 | 11 | 7  | 15 | 7  | 8  |
| 148 | Apolipoprotein A-II OS=Homo sapiens OX=9606 GN=APOA2 PE=1 SV=1                                                                 | APOA2_HUMAN      | APOA2    | 11 kDa  | 15 | 13 | 11 | 13 | 9  | 13 | 9  | 7  | 10 | 10 |
| 149 | Keratin, type II cytoskeletal 6A OS=Homo sapiens OX=9606 GN=KRT6A PE=1 SV=3                                                    | KRT6A_HUMAN      | KRT6A    | 60 kDa  | 25 | 14 | 10 | 14 | 6  | 13 | 19 | 6  | 16 | 26 |
| 150 | Aspartate aminotransferase, cytoplasmic OS=Homo sapiens OX=9606 GN=ASAT PE=1 SV=3                                              | AATC_HUMAN       | ASAT     | 46 kDa  | 13 | 8  | 8  | 13 | 5  | 13 | 10 | 6  | 10 | 10 |
| 151 | Complement factor B OS=Homo sapiens OX=9606 GN=CFB PE=1 SV=2                                                                   | CFAB_HUMAN       | CFB      | 86 kDa  | 14 | 6  | 20 | 6  | 4  | 9  | 5  | 13 | 5  | 8  |
| 152 | Ras-related C3 botulinum toxin substrate 1 OS=Homo sapiens OX=9606 GN=RAC1 PE=1 SV=1                                           | RAC1_HUMAN       | RAC1     | 21 kDa  | 8  | 5  | 9  | 22 | 8  | 12 | 12 | 14 | 9  | 9  |
| 153 | Thioredoxin OS=Homo sapiens OX=9606 GN=TXN PE=1 SV=3                                                                           | THIO_HUMAN       | TXN      | 12 kDa  | 11 | 9  | 8  | 10 | 9  | 10 | 11 | 16 | 7  | 7  |
| 154 | Calmodulin-1 OS=Homo sapiens OX=9606 GN=CALM1 PE=1 SV=1                                                                        | CALM1_HUMAN (+2) | CALM1    | 17 kDa  | 4  | 6  |    | 10 | 3  | 10 | 5  | 11 | 20 | 5  |
| 155 | Alpha-1-acid glycoprotein 1 OS=Homo sapiens OX=9606 GN=ORM1 PE=1 SV=1                                                          | A1AG1_HUMAN      | ORM1     | 23 kDa  | 20 | 13 | 15 | 9  | 15 | 6  | 10 | 13 | 22 | 11 |
| 156 | Olg-like ATPase 1 OS=Homo sapiens OX=9606 GN=OLA1 PE=1 SV=2                                                                    | OLA1_HUMAN       | OLA1     | 45 kDa  | 5  | 5  | 6  | 4  | 5  | 14 | 12 | 9  | 5  | 8  |
| 157 | Ras-related protein Rab-35 OS=Homo sapiens OX=9606 GN=RAB35 PE=1 SV=1                                                          | RAB35_HUMAN      | RAB35    | 23 kDa  | 7  | 18 | 10 | 17 | 9  | 12 | 8  | 12 | 12 | 12 |
| 158 | ATP-citrate synthase OS=Homo sapiens OX=9606 GN=ACLY PE=1 SV=3                                                                 | ACLY_HUMAN       | ACLY     | 121 kDa | 3  | 4  | 7  | 3  | 13 | 17 | 5  | 17 | 8  | 9  |
| 159 | Calpain small subunit 1 OS=Homo sapiens OX=9606 GN=CAPN1 PE=1 SV=1                                                             | CPN1_HUMAN       | CAPN1    | 28 kDa  | 10 | 7  | 7  | 6  | 11 | 12 | 9  | 10 | 10 | 9  |
| 160 | Protein diaphanous homolog 1 OS=Homo sapiens OX=9606 GN=DIAPH1 PE=1 SV=2                                                       | DIAP1_HUMAN      | DIAP1    | 141 kDa | 8  | 8  | 13 | 5  | 19 | 5  | 11 | 4  | 3  | 14 |
| 161 | Glutathione S-transferase omega-1 OS=Homo sapiens OX=9606 GN=GSTO1 PE=1 SV=2                                                   | GSTO1_HUMAN      | GSTO1    | 28 kDa  | 6  | 8  | 7  | 10 | 7  | 7  | 7  | 9  | 7  | 10 |
| 162 | Alpha-hemoglobin-stabilizing protein OS=Homo sapiens OX=9606 GN=AHSP PE=1 SV=1                                                 | AHSP_HUMAN       | AHSP     | 12 kDa  | 11 | 8  | 4  | 9  | 3  | 13 | 4  | 8  | 8  | 23 |
| 163 | Ubiquitin-conjugating enzyme E2 N OS=Homo sapiens OX=9606 GN=UBE2N PE=1 SV=1                                                   | UBE2N_HUMAN      | UBE2N    | 17 kDa  | 9  | 9  | 6  | 9  | 4  | 10 | 9  | 6  | 8  | 12 |
| 164 | Serine/threonine-protein phosphatase 2A OS kDa regulatory subunit A alpha isoform OS=Homo sapiens OX=9606 GN=PPP2R1A PE=1 SV=4 | PPP2R1A_HUMAN    | PPP2R1A  | 65 kDa  | 3  | 2  | 7  | 8  | 10 | 5  | 7  | 12 | 8  | 7  |
| 165 | Elongation factor 1-alpha 1 OS=Homo sapiens OX=9606 GN=EEF1A1 PE=1 SV=1                                                        | EEF1A1_HUMAN     | EEF1A1   | 50 kDa  | 6  | 6  | 8  | 7  | 8  | 4  | 11 | 4  | 3  | 14 |
| 166 | Protein-glutamine gamma-glutamyltransferase 2 OS=Homo sapiens OX=9606 GN=TMGM2 PE=1 SV=2                                       | TMGM2_HUMAN      | TGM2     | 77 kDa  | 3  |    | 9  | 7  | 6  | 8  | 6  | 15 | 9  | 9  |
| 167 | AP-2 complex subunit beta OS=Homo sapiens OX=9606 GN=AP2B1 PE=1 SV=1                                                           | AP2B1_HUMAN      | AP2B1    | 105 kDa | 3  | 2  | 6  |    | 6  | 5  | 6  | 12 | 9  | 11 |
| 168 | Clusterin OS=Homo sapiens OX=9606 GN=CLU PE=1 SV=1                                                                             | CLUS_HUMAN       | CLU      | 52 kDa  | 11 | 9  | 9  | 3  | 11 | 7  | 5  | 4  | 4  | 10 |
| 169 | Fibronectin OS=Homo sapiens OX=9606 GN=FN1 PE=1 SV=4                                                                           | FN1_HUMAN        | FN1      | 263 kDa | 13 | 48 | 7  | 3  | 3  |    |    | 2  | 2  |    |
| 170 | Proliferation-associated protein 2d4 OS=Homo sapiens OX=9606 GN=PA2G4 PE=1 SV=3                                                | PA2G4_HUMAN      | PA2G4    | 44 kDa  | 3  | 6  | 11 | 4  | 3  | 13 | 7  | 8  | 9  |    |
| 171 | Small integral membrane protein 1 OS=Homo sapiens OX=9606 GN=SMIM1 PE=1 SV=1                                                   | SMIM1_HUMAN      | SMIM1    | 9 kDa   | 9  | 10 | 8  | 11 | 14 | 10 | 7  |    | 16 |    |
| 172 | Protein XRP2 OS=Homo sapiens OX=9606 GN=RP2 PE=1 SV=4                                                                          | RP2_HUMAN        | RP2      | 40 kDa  | 6  | 8  | 12 | 9  | 7  | 5  | 5  | 10 | 13 | 5  |
| 173 | 5-formylglutathione hydrolase OS=Homo sapiens OX=9606 GN=ESD PE=1 SV=2                                                         | ESTD_HUMAN       | ESD      | 31 kDa  | 9  | 8  | 7  | 3  | 8  | 6  | 7  | 6  | 5  | 10 |
| 174 | 6-phosphogluconate dehydrogenase, decarboxylating OS=Homo sapiens OX=9606 GN=PGD PE=1 SV=3                                     | PGD_HUMAN        | PGD      | 53 kDa  | 5  | 6  |    | 4  | 9  | 5  | 9  | 10 | 9  | 4  |
| 175 | Ribose-phosphate pyrophosphokinease 1 OS=Homo sapiens OX=9606 GN=PRPS1 PE=1 SV=2                                               | PRPS1_HUMAN      | PRPS1    | 35 kDa  | 12 | 8  | 8  | 9  | 9  | 8  | 7  | 3  | 8  | 6  |
| 176 | Filamin-A OS=Homo sapiens OX=9606 GN=FLNA PE=1 SV=4                                                                            | FLNA_HUMAN       | FLNA     | 281 kDa | 9  | 36 |    |    | 15 |    |    |    |    |    |
| 177 | Adenosylhomocysteinase OS=Homo sapiens OX=9606 GN=AHCY PE=1 SV=4                                                               | SAHH_HUMAN       | AHCY     | 48 kDa  | 9  | 11 | 7  | 10 | 8  | 11 | 6  | 5  | 6  | 9  |
| 178 | Proteasome activator complex subunit 2 OS=Homo sapiens OX=9606 GN=PSME2 PE=1 SV=4                                              | PSME2_HUMAN      | PSME2    | 27 kDa  | 3  | 8  |    |    | 9  | 7  | 6  | 10 | 10 | 5  |
| 179 | Apolipoprotein E OS=Homo sapiens OX=9606 GN=APOE PE=1 SV=1                                                                     | APOE_HUMAN       | APOE     | 36 kDa  | 13 | 7  |    | 10 | 4  | 7  | 11 | 10 | 4  | 4  |
| 180 | Ubiquitin-like modifier-activating enzyme 1 OS=Homo sapiens OX=9606 GN=UBA1 PE=1 SV=3                                          | UBA1_HUMAN       | UBA1     | 118 kDa | 4  | 2  |    | 15 | 7  | 6  | 12 | 14 | 8  |    |
| 181 | 14-3-3 protein beta alpha OS=Homo sapiens OX=9606 GN=YWHAH PE=1 SV=3                                                           | Y43BH_HUMAN      | YWHAH    | 24 kDa  | 10 | 10 | 8  | 10 | 12 | 12 | 10 | 7  | 12 | 12 |
| 182 | Ubiquitin carboxyl-terminal hydrolase 5 OS=Homo sapiens OX=9606 GN=USP5 PE=1 SV=2                                              | USP5_HUMAN       | USP5     | 96 kDa  | 6  | 3  |    | 4  | 9  | 11 | 6  | 3  | 6  | 5  |
| 183 | Coagulation factor V OS=Homo sapiens OX=9606 GN=F5 PE=1 SV=4                                                                   | FAS_HUMAN        | F5       | 252 kDa | 13 | 24 |    | 13 |    |    |    | 2  | 7  |    |
| 184 | Lactoylglutathione lyase OS=Homo sapiens OX=9606 GN=GLO1 PE=1 SV=4                                                             | LGUL_HUMAN       | GLO1     | 21 kDa  |    |    |    |    | 5  | 2  | 5  |    | 5  | 6  |
| 185 | Prothrombin OS=Homo sapiens OX=9606 GN=F2 PE=1 SV=2                                                                            | THRB_HUMAN       | F2       | 70 kDa  | 13 | 14 |    | 15 | 6  | 2  | 3  | 10 | 5  | 4  |
| 186 | Elongation factor 2 OS=Homo sapiens OX=9606 GN=EEF2 PE=1 SV=1                                                                  | EEF2_HUMAN       | EEF2     | 70 kDa  |    |    |    |    |    | 3  |    |    |    |    |
| 187 | Hemoglobin subunit theta-1 OS=Homo sapiens OX=9606 GN=HBQ1 PE=1 SV=2                                                           | HBAT_HUMAN       | HBQ1     | 16 kDa  | 7  | 4  | 9  | 9  | 12 | 8  | 7  | 9  | 8  | 11 |
| 188 | Transketolase OS=Homo sapiens OX=9606 GN=TKT PE=1 SV=3                                                                         | TKT_HUMAN        | TKT      | 6       |    |    |    |    |    |    |    |    |    |    |

|     |                                                                                                            |                 |          |         |    |    |    |    |     |    |    |    |    |    |
|-----|------------------------------------------------------------------------------------------------------------|-----------------|----------|---------|----|----|----|----|-----|----|----|----|----|----|
| 201 | Proteasome subunit alpha type-5 OS=Homo sapiens OX-9606 GN=PSMA5 PE=1 SV=3                                 | PSA5_HUMAN      | PSMA5    | 26 kDa  | 9  | 7  | 5  | 6  | 5   | 12 | 11 | 3  | 6  | 11 |
| 202 | Apolipoprotein A-IV OS=Homo sapiens OX-9606 GN=APOA4 PE=1 SV=3                                             | APOA4_HUMAN     | APOA4    | 45 kDa  |    |    | 11 | 8  | 4   | 7  | 4  | 4  | 2  | 5  |
| 203 | Immunoglobulin heavy constant gamma 3 OS=Homo sapiens OX-9606 GN=IGHG3 PE=1 SV=2                           | IGHG3_HUMAN     | IGHG3    | 41 kDa  | 42 | 25 |    | 36 | 10  | 24 | 25 | 14 | 14 | 18 |
| 204 | Serine/threonine-protein kinase OSR1 OS=Homo sapiens OX-9606 GN=OSR1 PE=1 SV=1                             | OSR1_HUMAN      | OSR1     | 58 kDa  | 3  | 4  |    |    | 10  | 8  | 7  | 9  | 10 | 2  |
| 205 | cAMP-dependent protein kinase type I-alpha regulatory subunit OS=Homo sapiens OX-9606 GN=PRKAR1A PE=1 SV=1 | KAP0_HUMAN      | PRKAR1A  | 43 kDa  |    | 3  | 2  |    | 4   | 9  | 8  | 3  | 6  | 7  |
| 206 | Basigin OS=Homo sapiens OX-9606 GN=BSG PE=1 SV=2                                                           | BASI_HUMAN      | BSG      | 42 kDa  | 4  | 7  |    | 4  | 5   | 7  | 7  | 14 | 3  | 10 |
| 207 | T-complex protein 1 subunit zeta OS=Homo sapiens OX-9606 GN=CTC6A PE=1 SV=3                                | TCP2_HUMAN      | CTC6A    | 58 kDa  | 3  |    | 8  |    | 2   | 10 | 6  |    |    | 9  |
| 208 | Ubiquitin-conjugating enzyme E2 L3 OS=Homo sapiens OX-9606 GN=UBE2L3 PE=1 SV=1                             | UBE2L3_HUMAN    | UBE2L3   | 18 kDa  | 5  | 3  |    | 6  | 7   | 4  | 4  | 3  | 8  | 7  |
| 209 | Ras-related protein Rab-11B OS=Homo sapiens OX-9606 GN=RAB11B PE=1 SV=4                                    | RAB11B_HUMAN    | RAB11B   | 24 kDa  | 6  |    |    |    | 4   | 8  | 7  | 3  | 2  | 16 |
| 210 | Cullin-associated NEDD8-dissociated protein 1 OS=Homo sapiens OX-9606 GN=CAND1 PE=1 SV=2                   | CAND1_HUMAN     | CAND1    | 136 kDa |    | 5  | 10 |    | 2   | 10 | 2  | 10 | 9  |    |
| 211 | Glutathione S-transferase P OS=Homo sapiens OX-9606 GN=GSTP1 PE=1 SV=2                                     | GSTP1_HUMAN     | GSTP1    | 23 kDa  | 4  |    | 5  |    | 9   | 4  | 3  | 9  | 15 | 8  |
| 212 | Nucleosome assembly protein 1-like 4 OS=Homo sapiens OX-9606 GN=NAP1L4 PE=1 SV=1                           | NP1L4_HUMAN     | NAP1L4   | 43 kDa  |    | 3  | 7  |    | 3   | 10 | 8  | 12 |    | 9  |
| 213 | Kell blood group glycoprotein OS=Homo sapiens OX-9606 GN=KEL PE=1 SV=2                                     | KEL_HUMAN       | KEL      | 83 kDa  | 4  | 3  |    |    | 7   | 4  | 3  | 7  | 9  | 2  |
| 214 | Complement C1q subcomponent subunit B OS=Homo sapiens OX-9606 GN=C1QB PE=1 SV=3                            | C1QB_HUMAN      | C1QB     | 27 kDa  | 5  | 3  |    | 32 |     |    |    |    |    | 8  |
| 215 | CD44 antigen OS=Homo sapiens OX-9606 GN=CD44 PE=1 SV=3                                                     | CD44_HUMAN      | CD44     | 82 kDa  |    | 6  | 6  |    | 5   | 8  | 10 | 6  | 6  | 9  |
| 216 | Uroporphyrinogen decarboxylase OS=Homo sapiens OX-9606 GN=UROD PE=1 SV=2                                   | UCDP_HUMAN      | UROD     | 41 kDa  | 4  | 3  | 5  | 2  | 7   | 6  | 3  |    | 8  | 5  |
| 217 | Ribose-5-phosphate isomerase OS=Homo sapiens OX-9606 GN=RPIA PE=1 SV=3                                     | RPIA_HUMAN      | RPIA     | 33 kDa  | 4  | 7  | 5  | 5  | 6   | 8  | 3  | 11 | 4  | 10 |
| 218 | GMP reductase 1 OS=Homo sapiens OX-9606 GN=GMFR PE=1 SV=1                                                  | GMFR1_HUMAN     | GMFR     | 37 kDa  | 2  | 3  |    |    | 8   | 6  | 4  | 9  | 4  | 5  |
| 219 | Protein S100-A4 OS=Homo sapiens OX-9606 GN=S100A4 PE=1 SV=1                                                | S10A4_HUMAN     | S10A4    | 12 kDa  | 6  | 6  | 7  |    | 5   | 6  | 7  | 5  | 5  | 7  |
| 220 | Nucleoside diphosphate kinase B OS=Homo sapiens OX-9606 GN=NM22 PE=1 SV=1                                  | NM2_HUMAN       | NM2      | 17 kDa  |    |    | 9  |    | 10  | 14 | 11 | 7  | 14 |    |
| 221 | Vacuolar protein sorting-associated protein VTA1 homolog OS=Homo sapiens OX-9606 GN=VTA1 PE=1 SV=1         | VTA1_HUMAN      | VTA1     | 34 kDa  |    |    | 7  | 5  | 3   | 12 | 4  | 8  | 2  | 10 |
| 222 | Programmed cell death protein 6 OS=Homo sapiens OX-9606 GN=PCDD6 PE=1 SV=1                                 | PCDD6_HUMAN     | PCDD6    | 22 kDa  |    |    | 5  |    | 2   | 15 |    | 6  |    | 13 |
| 223 | Immunoglobulin J chain OS=Homo sapiens OX-9606 GN=JCHAIN PE=1 SV=4                                         | IGJ_HUMAN       | JCHAIN   | 18 kDa  | 9  | 6  | 6  | 6  | 2   | 6  | 12 | 4  |    | 8  |
| 224 | Hydroxyacylglutathione hydrolase, mitochondrial OS=Homo sapiens OX-9606 GN=HAGH PE=1 SV=2                  | GLO2_HUMAN      | HAGH     | 34 kDa  | 6  | 7  | 7  | 7  | 5   | 5  | 5  | 4  | 6  | 9  |
| 225 | Ecto-ADP-ribosyltransferase 4 OS=Homo sapiens OX-9606 GN=ART4 PE=2 SV=2                                    | NAH4_HUMAN      | ART4     | 36 kDa  | 6  |    |    |    | 4   | 10 |    |    |    | 4  |
| 226 | Transaldolase OS=Homo sapiens OX-9606 GN=TALDO1 PE=1 SV=2                                                  | TALDO_HUMAN     | TALDO1   | 38 kDa  |    | 3  | 5  |    | 8   | 12 | 5  | 5  | 5  | 8  |
| 227 | Pyruvate kinase PKLR OS=Homo sapiens OX-9606 GN=PKLR PE=1 SV=2                                             | KPYR_HUMAN      | PKLR     | 62 kDa  | 2  | 2  | 7  |    | 6   | 10 |    |    |    | 7  |
| 228 | Zinc-alpha-2-glycoprotein OS=Homo sapiens OX-9606 GN=AZGP1 PE=1 SV=2                                       | ZAG1_HUMAN      | AZGP1    | 34 kDa  | 10 |    | 3  | 7  | 5   | 4  | 4  |    | 5  | 5  |
| 229 | Proteasome subunit alpha type 2 OS=Homo sapiens OX-9606 GN=PSMA2 PE=1 SV=2                                 | PSA2_HUMAN      | PSMA2    | 26 kDa  | 4  | 2  | 4  |    | 5   | 8  | 6  | 11 | 8  | 4  |
| 230 | Protein S100-A6 OS=Homo sapiens OX-9606 GN=S100A6 PE=1 SV=1                                                | S10A6_HUMAN     | S10A6    | 12 kDa  | 4  |    |    |    | 3   | 4  |    | 3  | 7  | 2  |
| 231 | Acetyl-CoA acetyltransferase, cytosolic OS=Homo sapiens OX-9606 GN=ACAT2 PE=1 SV=2                         | THIC_HUMAN      | ACAT2    | 21 kDa  | 2  |    | 5  |    | 7   | 5  | 3  |    | 12 | 3  |
| 232 | Hemoglobin subunit zeta OS=Homo sapiens OX-9606 GN=HBZ PE=1 SV=2                                           | HBAZ_HUMAN      | HBZ      | 16 kDa  | 10 | 3  |    | 3  | 9   | 3  | 17 | 3  | 16 | 3  |
| 233 | Lymphocyte function-associated antigen 3 OS=Homo sapiens OX-9606 GN=CD58 PE=1 SV=1                         | LFA3_HUMAN      | CD58     | 28 kDa  | 5  | 4  | 4  |    | 9   | 5  | 3  | 10 | 5  | 5  |
| 234 | Glutamate-cysteine ligase catalytic subunit OS=Homo sapiens OX-9606 GN=GCLC PE=1 SV=2                      | GSH1_HUMAN      | GCLC     | 73 kDa  | 5  | 4  | 3  |    | 3   | 9  | 6  | 2  | 7  | 3  |
| 235 | Transferrin OS=Homo sapiens OX-9606 GN=TFR PE=1 SV=1                                                       | TFH_HUMAN       | TFR      | 16 kDa  | 6  | 8  | 4  |    | 2   | 9  | 3  | 2  | 7  | 9  |
| 236 | Inter-alpha-trypsin inhibitor heavy chain H2 OS=Homo sapiens OX-9606 GN=ITHI2 PE=1 SV=2                    | ITHI2_HUMAN     | ITHI2    | 106 kDa | 10 | 12 | 4  | 9  |     | 2  | 2  | 2  | 6  | 3  |
| 237 | T-complex protein 1 subunit theta OS=Homo sapiens OX-9606 GN=CTC8 PE=1 SV=4                                | TCPQ_HUMAN      | CTC8     | 60 kDa  | 5  | 3  | 6  |    | 3   | 12 | 4  | 5  |    | 6  |
| 238 | Calpain-1 catalytic subunit OS=Homo sapiens OX-9606 GN=CAPN1 PE=1 SV=1                                     | CAPN1_HUMAN     | CAPN1    | 82 kDa  | 5  | 4  |    |    | 7   | 2  | 5  |    | 4  | 6  |
| 239 | T-complex protein 1 subunit epsilon OS=Homo sapiens OX-9606 GN=CTC5 PE=1 SV=1                              | TCPE_HUMAN      | CTC5     | 4 kDa   | 3  |    |    |    | 6   | 9  | 5  | 14 |    | 4  |
| 240 | Plasma membrane calcium-transporting ATPase 4 OS=Homo sapiens OX-9606 GN=ATP2B4 PE=1 SV=2                  | AT2B4_HUMAN     | AT2B4    | 138 kDa | 5  |    |    | 3  | 4   | 10 |    |    |    | 4  |
| 241 | Platelet-activating factor acetylhydrolase II subunit gamma OS=Homo sapiens OX-9606 GN=PAFAH1B3 PE=1 SV=1  | PA1B3_HUMAN     | PAFAH1B3 | 26 kDa  | 3  | 5  | 6  | 2  | 4   | 5  | 6  | 5  | 5  | 5  |
| 242 | Adenylosuccinate lyase OS=Homo sapiens OX-9606 GN=ADSL PE=1 SV=2                                           | PUR8_HUMAN      | ADSL     | 55 kDa  | 3  | 2  |    |    | 7   | 5  | 3  |    | 8  | 2  |
| 243 | D-dopachrome decarboxylase OS=Homo sapiens OX-9606 GN=DDT PE=1 SV=3                                        | DOPD_HUMAN      | DDT      | 13 kDa  | 5  | 6  |    |    | 6   | 5  | 4  | 8  | 8  | 6  |
| 244 | Plasma protease C1 inhibitor OS=Homo sapiens OX-9606 GN=SERPING1 PE=1 SV=2                                 | ICI_HUMAN       | SERPING1 | 55 kDa  | 5  | 7  |    | 5  |     | 7  |    | 3  | 6  | 5  |
| 245 | Integrin alpha-1B OS=Homo sapiens OX-9606 GN=ITGA2B PE=1 SV=3                                              | ITAB2B_HUMAN    | ITAB2B   | 113 kDa | 7  |    |    |    |     | 2  | 10 |    |    |    |
| 246 | Plasminogen OS=Homo sapiens OX-9606 GN=PLG PE=1 SV=2                                                       | PLG_HUMAN       | PLG      | 91 kDa  | 3  | 7  | 8  |    |     |    |    | 3  |    | 5  |
| 247 | PITH domain-containing protein 1 OS=Homo sapiens OX-9606 GN=PITHD1 PE=1 SV=1                               | PITH1_HUMAN     | PITHD1   | 24 kDa  | 2  | 5  |    | 8  | 3   | 5  | 4  | 3  | 3  | 7  |
| 248 | Proteasome subunit alpha type-7 OS=Homo sapiens OX-9606 GN=PSMA7 PE=1 SV=1                                 | PSA7_HUMAN      | PSMA7    | 28 kDa  | 3  | 3  |    | 9  | 4   | 2  | 8  |    | 4  | 7  |
| 249 | Ras-related protein Rab-7a OS=Homo sapiens OX-9606 GN=RAB7A PE=1 SV=1                                      | RAB7A_HUMAN     | RAB7A    | 23 kDa  | 3  |    |    |    | 2   | 13 | 5  | 7  |    | 10 |
| 250 | Low molecular weight phosphotyrosine protein phosphatase OS=Homo sapiens OX-9606 GN=ACP1 PE=1 SV=3         | PPAC_HUMAN      | ACP1     | 18 kDa  | 5  | 4  | 7  | 2  | 2   | 9  | 9  | 5  | 4  | 9  |
| 251 | Angiotensinogen OS=Homo sapiens OX-9606 GN=AGT PE=1 SV=1                                                   | ANGT_HUMAN      | AGT      | 53 kDa  | 7  |    |    |    | 4   | 6  |    |    | 2  | 2  |
| 252 | Arginase-1 OS=Homo sapiens OX-9606 GN=ARG1 PE=1 SV=2                                                       | ARG1_HUMAN      | ARG1     | 35 kDa  | 3  | 2  | 3  |    | 2   | 4  | 7  | 9  | 12 | 5  |
| 253 | Guanine nucleotide-binding protein subunit alpha-13 OS=Homo sapiens OX-9606 GN=GNA13 PE=1 SV=2             | GNA13_HUMAN     | GNA13    | 44 kDa  | 4  |    | 5  |    | 4   | 8  | 5  | 7  | 3  | 16 |
| 254 | Immunoglobulin heavy constant gamma 4 OS=Homo sapiens OX-9606 GN=IGHG4 PE=1 SV=1                           | IGHG4_HUMAN     | IGHG4    | 36 kDa  |    | 43 | 59 |    |     |    |    | 22 |    | 22 |
| 255 | Keratin, type II cytoskeletal 5 OS=Homo sapiens OX-9606 GN=KRT5 PE=1 SV=3                                  | KRT5_HUMAN      | KRT5     | 62 kDa  | 28 | 10 |    | 11 |     | 17 | 17 |    | 14 | 27 |
| 256 | Tubulin beta-4b chain OS=Homo sapiens OX-9606 GN=TUBB4B PE=1 SV=1                                          | TUB4B_HUMAN     | TUB4B    | 50 kDa  |    | 3  |    |    | 2   | 9  |    | 3  |    | 13 |
| 257 | Syntaxin-7 OS=Homo sapiens OX-9606 GN=STX7 PE=1 SV=4                                                       | STX7_HUMAN      | STX7     | 30 kDa  | 4  | 5  | 2  |    | 4   | 6  | 5  | 9  | 3  | 6  |
| 258 | L-lactate dehydrogenase A chain OS=Homo sapiens OX-9606 GN=LDHA PE=1 SV=2                                  | LDHA_HUMAN      | LDHA     | 37 kDa  | 5  |    | 2  | 2  | 7   | 6  | 4  | 4  | 6  | 4  |
| 259 | Ras-related protein Rab-14 OS=Homo sapiens OX-9606 GN=RAB14 PE=1 SV=4                                      | RAB14_HUMAN     | RAB14    | 24 kDa  |    |    |    |    | 2   | 7  | 7  |    | 3  | 9  |
| 260 | Actin, alpha cardiac muscle 1 OS=Homo sapiens OX-9606 GN=ACTC1 PE=1 SV=1                                   | ACTC_HUMAN (+1) | ACTC1    | 42 kDa  |    |    | 12 |    |     |    |    | 12 |    |    |
| 261 | Histidine-rich glycoprotein OS=Homo sapiens OX-9606 GN=HRG PE=1 SV=1                                       | HRG_HUMAN       | HRG      | 60 kDa  | 11 | 5  |    | 5  |     |    | 5  |    |    | 5  |
| 262 | Tubulin alpha-1B chain OS=Homo sapiens OX-9606 GN=TUBA1B PE=1 SV=1                                         | TBA1B_HUMAN     | TUBA1B   | 50 kDa  |    | 3  | 7  |    | 2   | 3  |    | 12 |    | 17 |
| 263 | Heat shock 70 kDa protein 4 OS=Homo sapiens OX-9606 GN=HSPA4 PE=1 SV=4                                     | HSP74_HUMAN     | HSPA4    | 94 kDa  | 5  | 2  |    | 2  | 6   | 7  | 4  | 5  |    | 3  |
| 264 | Glutathione peroxidase 1 OS=Homo sapiens OX-9606 GN=GPX1 PE=1 SV=4                                         | GPX1_HUMAN      | GPX1     | 22 kDa  | 6  | 2  | 5  |    | 7   | 7  | 3  | 5  | 7  | 7  |
| 265 | IST1 homologue OS=Homo sapiens OX-9606 GN=IST1 PE=1 SV=1                                                   | IST1_HUMAN      | IST1     | 40 kDa  | 5  |    |    | 5  | 5   | 11 | 5  |    |    | 11 |
| 266 | Ras-related protein Rab-5C OS=Homo sapiens OX-9606 GN=RAB5C PE=1 SV=2                                      | RAB5C_HUMAN     | RAB5C    | 23 kDa  | 5  | 5  | 4  | 5  | 7   | 3  |    | 6  | 5  | 5  |
| 267 | Phosphoglycerate mutase 1 OS=Homo sapiens OX-9606 GN=PGAM1 PE=1 SV=2                                       | PGAM1_HUMAN     | PGAM1    | 29 kDa  | 5  |    | 3  |    | 2   | 5  | 2  | 4  | 4  | 3  |
| 268 | Biliverdin reductase A OS=Homo sapiens OX-9606 GN=BLVRA PE=1 SV=1                                          | BIEA_HUMAN      | BLVRA    | 33 kDa  | 2  | 2  | 6  | 2  | 8   | 3  |    | 8  | 7  | 4  |
| 269 | Kinogen-1 OS=Homo sapiens OX-9606 GN=KNG1 PE=1 SV=2                                                        | KNG1_HUMAN      | KNG1     | 72 kDa  | 7  | 8  | 6  |    | 2   | 4  |    |    | 3  | 5  |
| 270 | Rho GDP-dissociation inhibitor 1 OS=Homo sapiens OX-9606 GN=ARHGDA1 PE=1 SV=3                              | GDIR1_HUMAN     | ARHGDA1  | 23 kDa  | 3  | 4  | 5  | 2  | 5   | 7  | 4  | 2  | 3  | 3  |
| 271 | Glutamate-cysteine ligase regulatory subunit OS=Homo sapiens OX-9606 GN=GCLM PE=1 SV=1                     | GSHD_HUMAN      | GCLM     | 31 kDa  | 5  |    | 5  |    | 3   | 6  |    |    |    |    |
| 272 | GDP-L-fucose synthase OS=Homo sapiens OX-9606 GN=TSTA3 PE=1 SV=1                                           | FCL_HUMAN       | TSTA3    | 36 kDa  | 2  | 2  |    |    | 3   | 4  | 4  |    | 2  | 4  |
| 273 | Leucine-rich repeat-containing protein 57 OS=Homo sapiens OX-9606 GN=LRRCS7 PE=1 SV=1                      | LRC57_HUMAN     | LRRCS7   | 27 kDa  | 2  | 3  |    |    | 3   | 4  | 6  | 3  | 6  | 5  |
| 274 | Uncharacterized protein C1orf198 OS=Homo sapiens OX-9606 GN=C1orf198 PE=1 SV=1                             | CA198_HUMAN     | C1orf198 | 36 kDa  | 2  | 2  | 5  |    | 3   | 4  | 5  | 3  | 6  | 5  |
| 275 | Proteasome inhibitor P131 subunit OS=Homo sapiens OX-9606 GN=PSMF1 PE=1 SV=2                               | PSMF1_HUMAN     | PSMF1    | 30 kDa  | 5  |    |    | 5  | 6   | 5  | 4  | 3  | 2  | 4  |
| 276 | F-box only protein 7 OS=Homo sapiens OX-9606 GN=FBXO7 PE=1 SV=1                                            | FBX7_HUMAN      | FBX7     | 59 kDa  | 4  |    |    |    | 3   | 4  | 4  | 4  |    | 4  |
| 277 | Myotrophin OS=Homo sapiens OX-9606 GN=MTN7 PE=1 SV=2                                                       | MTN7_HUMAN      | MTN7     | 13 kDa  | 6  |    |    |    | 3   | 4  | 5  |    | 4  | 3  |
| 278 | 26S proteasome non-ATPase regulatory subunit 2 OS=Homo sapiens OX-9606 GN=PSMD2 PE=1 SV=3                  | PSMD2_HUMAN     | PSMD2    | 100 kDa | 3  | 4  | 5  |    | 6   | 5  |    | 4  | 7  | 5  |
| 279 | T-complex protein 1 subunit delta OS=Homo sapiens OX-9606 GN=CTC4 PE=1 SV=4                                | TCPD_HUMAN      | CTC4     | 58 kDa  | 3  | 2  | 3  |    | 4   | 10 | 4  | 6  |    |    |
| 280 | Keratin, type II cuticular Hb6 OS=Homo sapiens OX-9606 GN=KRTB6 PE=1 SV=1                                  | KRTB6_HUMAN     | KRTB6    | 53 kDa  | 34 |    |    | 2  |     |    |    |    |    | 4  |
| 281 | 3-mercaptopyruvate sulfurtransferase OS=Homo sapiens OX-9606 GN=MPST PE=1 SV=3                             | THYM_HUMAN      | MPST     | 33 kDa  |    |    |    |    | 3   | 5  | 5  | 2  | 2  | 4  |
| 282 | Serine/threonine-protein phosphatase 2A activator OS=Homo sapiens OX-9606 GN=PTPA PE=1 SV=3                | PTPA_HUMAN      | PTPA     | 43 kDa  | 3  |    |    |    | 3   | 3  |    |    | 3  | 4  |
| 283 | Glutaredoxin-3 OS=Homo sapiens OX-9606 GN=GLRX PE=1 SV=2                                                   | GLRX_HUMAN      | GLRX     | 12 kDa  | 6  |    | 2  |    | 3   |    |    | 2  | 6  | 6  |
| 284 | Serum paraoxonase/arylesterase 1 OS=Homo sapiens OX-9606 GN=PON1 PE=1 SV=3                                 | PON1_HUMAN      | PON1     | 40 kDa  | 7  | 6  | 7  | 3  |     | 2  |    | 7  |    |    |
| 285 | Charged multivesicular body protein 6 OS=Homo sapiens OX-9606 GN=CHMP6 PE=1 SV=3                           | CHMP6_HUMAN     | CHMP6    | 23 kDa  | 3  | 4  | 5  | 4  | 8   | 5  | 3  | 2  | 5  | 6  |
| 286 | Axin interactor, dorsalization-associated protein OS=Homo sapiens OX-9606 GN=AIDA PE=1 SV=1                | AIDA_HUMAN      | AIDA     | 35 kDa  |    | 5  | 5  | 3  | 4   | 3  | 7  | 7  | 4  | 4  |
| 287 | Proteasome subunit beta type-4 OS=Homo sapiens OX-9606 GN=PSMB4 PE=1 SV=4                                  | PSMB4_HUMAN     | PSMB4    | 35 kDa  | 4  | 3  |    |    | 3   | 6  |    |    |    |    |
| 288 | Hemoglobin subunit mu OS=Homo sapiens OX-9606 GN=HBM PE=1 SV=1                                             | HBM_HUMAN       | HBM      | 16 kDa  |    | 3  | 2  | 7  | 6   | 3  |    | 7  | 3  |    |
| 289 | Osteoclast-stimulating factor 1 OS=Homo sapiens OX-9606 GN=OSTF1 PE=1 SV=2                                 | OSTF1_HUMAN     | OSTF1    | 24 kDa  | 3  |    | 3  |    | 2   | 5  |    |    | 3  | 6  |
| 290 | 14-3-3 protein theta OS=Homo sapiens OX-9606 GN=YWHAQ PE=1 SV=1                                            | 143T3_HUMAN     | YWHAQ    | 28 kDa  |    |    | 8  |    |     | 11 | 7  | 9  |    | 11 |
| 291 | Aquaporin-1 OS=Homo sapiens OX-9606 GN=AQP1 PE=1 SV=3                                                      | AQP1_HUMAN      | AQP1     | 29 kDa  |    |    |    | 2  | 9   |    |    | 8  |    |    |
| 292 | Thioredoxin-like protein 1 OS=Homo sapiens OX-9606 GN=TXN1L PE=1 SV=3                                      | TXN1L_HUMAN     | TXN1L    | 23 kDa  | 4  | 3  | 6  |    | 2   | 6  | 5  | 2  |    | 11 |
| 293 | Calcium-binding protein 39 OS=Homo sapiens OX-9606 GN=CAB39 PE=1 SV=1                                      | CAB39_HUMAN     | CAB39    | 29 kDa  |    |    |    | 3  | 3   | 4  |    |    |    |    |
| 294 | Bifunctional purine biosynthesis protein PURH OS=Homo sapiens OX-9606 GN=ATIC PE=1 SV=3                    | PUR9_HUMAN      | ATIC     | 65 kDa  |    |    |    |    | 7</ |    |    |    |    |    |

|     |                                                                                                                     |               |          |         |    |    |    |    |    |    |    |    |
|-----|---------------------------------------------------------------------------------------------------------------------|---------------|----------|---------|----|----|----|----|----|----|----|----|
| 302 | T-complex protein 1 subunit alpha OS=Homo sapiens OX-9606 GN=TCP1 PE=1 SV=1                                         | TCPA_HUMAN    | TCP1     | 60 kDa  | 2  |    | 6  |    | 9  |    |    | 5  |
| 303 | Aflamin OS=Homo sapiens OX-9606 GN=AFM PE=1 SV=1                                                                    | AFAM_HUMAN    | AFM      | 69 kDa  |    | 4  | 9  | 3  |    | 6  |    |    |
| 304 | Nuclear transport factor 2 OS=Homo sapiens OX-9606 GN=NTF2 PE=1 SV=1                                                | NTF2_HUMAN    | NTF2     | 14 kDa  | 2  | 4  |    |    | 6  |    | 5  | 3  |
| 305 | Ras-related protein Rap-1b OS=Homo sapiens OX-9606 GN=RAP1B PE=1 SV=1                                               | RAP1B_HUMAN   | RAP1B    | 21 kDa  |    | 22 | 30 | 24 | 36 | 2  |    | 33 |
| 306 | Junctional adhesion molecule A OS=Homo sapiens OX-9606 GN=F11R PE=1 SV=1                                            | JAM1_HUMAN    | F11R     | 33 kDa  |    |    | 2  | 3  | 5  | 3  |    |    |
| 307 | Proteasome subunit beta type-2 OS=Homo sapiens OX-9606 GN=PSMB2 PE=1 SV=1                                           | PSB2_HUMAN    | PSMB2    | 23 kDa  | 2  |    | 2  | 3  | 3  | 2  | 6  | 2  |
| 308 | Charged multivesicular body protein 4a OS=Homo sapiens OX-9606 GN=CHMP4A PE=1 SV=3                                  | CHMP4A_HUMAN  | CHMP4A   | 25 kDa  |    |    | 4  |    | 9  | 3  |    | 11 |
| 309 | F-actin-capping protein subunit beta OS=Homo sapiens OX-9606 GN=CAPZB PE=1 SV=4                                     | CAPZB_HUMAN   | CAPZB    | 31 kDa  | 3  | 3  | 2  | 4  | 7  | 3  | 3  |    |
| 310 | Proteasome subunit beta type-1 OS=Homo sapiens OX-9606 GN=PSMB1 PE=1 SV=2                                           | PSB1_HUMAN    | PSMB1    | 26 kDa  |    | 2  | 4  |    | 3  |    | 5  |    |
| 311 | F-actin-capping protein subunit alpha 1 OS=Homo sapiens OX-9606 GN=CAPZA1 PE=1 SV=3                                 | CAPZA1_HUMAN  | CAPZA1   | 33 kDa  | 3  |    | 2  | 2  | 4  | 3  | 3  | 8  |
| 312 | Rho GTPase-activating protein 1 OS=Homo sapiens OX-9606 GN=ARHGAP1 PE=1 SV=1                                        | RHG01_HUMAN   | ARHGAP1  | 50 kDa  |    |    | 4  | 2  | 9  | 3  | 4  | 10 |
| 313 | DnaJ homolog subfamily B member 2 OS=Homo sapiens OX-9606 GN=DNAJB2 PE=1 SV=3                                       | DNAJB2_HUMAN  | DNAJB2   | 36 kDa  | 2  | 6  | 7  | 6  | 3  |    |    | 4  |
| 314 | Ubiquitin-conjugating enzyme E2 variant 2 OS=Homo sapiens OX-9606 GN=UBE2V2 PE=1 SV=4                               | UBE2V2_HUMAN  | UBE2V2   | 16 kDa  |    | 2  | 4  | 2  | 4  | 4  |    | 6  |
| 315 | Fermitin family homolog 3 OS=Homo sapiens OX-9606 GN=FERMT3 PE=1 SV=1                                               | FERMT3_HUMAN  | FERMT3   | 76 kDa  | 2  | 11 |    |    |    | 5  |    | 2  |
| 316 | Proteasome subunit alpha type-4 OS=Homo sapiens OX-9606 GN=PSMA4 PE=1 SV=1                                          | PSA4_HUMAN    | PSMA4    | 29 kDa  | 2  |    | 3  | 2  | 5  | 4  |    | 3  |
| 317 | Ubiquitin thioesterase OTU1 OS=Homo sapiens OX-9606 GN=YOD1 PE=1 SV=1                                               | OTU1_HUMAN    | YOD1     | 38 kDa  |    |    | 3  |    | 4  | 3  | 4  | 2  |
| 318 | Equilibrative nucleoside transporter 1 OS=Homo sapiens OX-9606 GN=SLC29A1 PE=1 SV=3                                 | S29A1_HUMAN   | SLC29A1  | 50 kDa  | 4  |    | 5  |    | 6  | 3  | 5  | 7  |
| 319 | Nectin-1 OS=Homo sapiens OX-9606 GN=NECTIN1 PE=1 SV=3                                                               | NECT1_HUMAN   | NECTIN1  | 57 kDa  | 4  | 3  |    |    | 7  | 3  | 6  | 3  |
| 320 | 26S proteasome regulatory subunit 6A OS=Homo sapiens OX-9606 GN=PSMC3 PE=1 SV=3                                     | PSMC3_HUMAN   | PSMC3    | 49 kDa  |    |    | 3  |    | 5  | 2  | 4  | 8  |
| 321 | Importin subunit beta-1 OS=Homo sapiens OX-9606 GN=IPNB1 PE=1 SV=2                                                  | IMP1_HUMAN    | IPNB1    | 97 kDa  |    |    | 4  |    | 4  |    |    | 6  |
| 322 | NADH-cytochrome b5 reductase 3 OS=Homo sapiens OX-9606 GN=CYBSR3 PE=1 SV=3                                          | NBSR3_HUMAN   | CYBSR3   | 34 kDa  | 3  | 3  | 3  |    | 7  | 3  |    | 2  |
| 323 | Calpain-5 OS=Homo sapiens OX-9606 GN=CAPNS PE=1 SV=2                                                                | CAN5_HUMAN    | CAPNS    | 73 kDa  | 5  | 3  |    |    | 8  |    |    |    |
| 324 | Fumarylacetoacetase OS=Homo sapiens OX-9606 GN=FAH PE=1 SV=2                                                        | FAA_HUMAN     | FAH      | 46 kDa  |    | 2  | 6  |    | 3  |    | 6  | 5  |
| 325 | Vacuolar protein sorting-associated protein 4A OS=Homo sapiens OX-9606 GN=VPS4A PE=1 SV=1                           | VPS4A_HUMAN   | VPS4A    | 49 kDa  |    |    |    |    |    |    |    | 15 |
| 326 | Proteasome subunit alpha type-6 OS=Homo sapiens OX-9606 GN=PSMA6 PE=1 SV=1                                          | PSA6_HUMAN    | PSMA6    | 27 kDa  | 2  |    | 3  | 3  | 4  | 3  |    | 6  |
| 327 | Ubiquitin-associated domain-containing protein 1 OS=Homo sapiens OX-9606 GN=UBAC1 PE=1 SV=1                         | UBAC1_HUMAN   | UBAC1    | 45 kDa  |    |    | 7  | 3  | 4  | 2  | 3  |    |
| 328 | Malignant T-cell-amplified sequence 1 OS=Homo sapiens OX-9606 GN=MCTS1 PE=1 SV=1                                    | MCTS1_HUMAN   | MCTS1    | 21 kDa  |    |    | 5  |    | 2  | 4  | 3  | 4  |
| 329 | 14 kDa phosphohistidine phosphatase OS=Homo sapiens OX-9606 GN=PHPT1 PE=1 SV=1                                      | PHPT1_HUMAN   | PHPT1    | 14 kDa  | 2  |    |    |    | 3  | 5  |    | 4  |
| 330 | Synaptosomal-associated protein 23 OS=Homo sapiens OX-9606 GN=SNAP23 PE=1 SV=1                                      | SNP23_HUMAN   | SNAP23   | 23 kDa  |    |    | 4  |    | 3  | 2  | 3  |    |
| 331 | BRD1 domain-containing protein BRD1 OS=Homo sapiens OX-9606 GN=BRD1 PE=1 SV=1                                       | BRD1_HUMAN    | BRD1     | 46 kDa  | 3  |    | 3  | 2  | 7  | 3  | 4  | 6  |
| 332 | Calcium and integrin-binding protein 1 OS=Homo sapiens OX-9606 GN=CIB1 PE=1 SV=4                                    | CIB1_HUMAN    | CIB1     | 22 kDa  | 5  | 2  |    |    | 6  | 2  | 2  | 9  |
| 333 | Glyoxalase domain-containing protein 4 OS=Homo sapiens OX-9606 GN=GLOD4 PE=1 SV=1                                   | GLOD4_HUMAN   | GLOD4    | 35 kDa  |    |    | 4  | 2  | 4  | 5  |    | 3  |
| 334 | Glutathione reductase, mitochondrial OS=Homo sapiens OX-9606 GN=GSR PE=1 SV=2                                       | GSR_HUMAN     | GSR      | 56 kDa  |    |    | 3  |    |    |    | 5  | 8  |
| 335 | Phosphatidylinositol transfer protein alpha isoform OS=Homo sapiens OX-9606 GN=PTPNA PE=1 SV=2                      | PTPNA_HUMAN   | PTPNA    | 32 kDa  |    |    | 5  | 3  | 2  | 3  |    | 4  |
| 336 | Salute carrier family 4b member 1 OS=Homo sapiens OX-9606 GN=SLC40A1 PE=1 SV=1                                      | SLC40A1_HUMAN | SLC40A1  | 43 kDa  | 5  |    | 4  | 3  | 6  |    |    | 3  |
| 337 | Proteasome subunit beta type-3 OS=Homo sapiens OX-9606 GN=PSMB3 PE=1 SV=2                                           | PSB3_HUMAN    | PSMB3    | 23 kDa  |    | 4  |    | 4  | 4  | 5  |    | 3  |
| 338 | Dipeptidyl peptidase 3 OS=Homo sapiens OX-9606 GN=DPPI3 PE=1 SV=2                                                   | DPPI3_HUMAN   | DPPI3    | 83 kDa  |    |    |    |    | 2  | 4  | 4  | 3  |
| 339 | AP-2 complex subunit mu OS=Homo sapiens OX-9606 GN=AP2M1 PE=1 SV=2                                                  | AP2M1_HUMAN   | AP2M1    | 50 kDa  |    |    | 3  |    | 3  | 4  | 3  | 5  |
| 340 | Protein phosphatase 1 regulatory subunit 7 OS=Homo sapiens OX-9606 GN=PPP1R7 PE=1 SV=1                              | PPP1R7_HUMAN  | PPP1R7   | 42 kDa  |    |    | 5  |    | 4  |    |    | 4  |
| 341 | Syntenin-1 OS=Homo sapiens OX-9606 GN=SDCBP PE=1 SV=1                                                               | SOCB1_HUMAN   | SOCBP    | 22 kDa  |    |    |    |    | 2  |    | 12 | 6  |
| 342 | Macrophage migration inhibitory factor OS=Homo sapiens OX-9606 GN=MIF PE=1 SV=4                                     | MIF_HUMAN     | MIF      | 12 kDa  | 3  |    | 4  | 2  | 3  | 2  |    |    |
| 343 | Haptoglobin-related protein OS=Homo sapiens OX-9606 GN=HPR PE=2 SV=2                                                | HPR_HUMAN     | HPR      | 39 kDa  | 18 |    | 14 | 16 | 17 |    | 7  | 14 |
| 344 | Proteasome subunit beta type-5 OS=Homo sapiens OX-9606 GN=PSMB5 PE=1 SV=3                                           | PSB5_HUMAN    | PSMB5    | 28 kDa  | 3  |    |    |    | 3  | 4  |    | 4  |
| 345 | Monocarboxylate transporter 1 OS=Homo sapiens OX-9606 GN=SLC16A1 PE=1 SV=3                                          | MDT1_HUMAN    | SLC16A1  | 54 kDa  |    |    |    |    |    |    |    |    |
| 346 | Tubulin-specific chaperone A OS=Homo sapiens OX-9606 GN=TRCA PE=1 SV=3                                              | TRCA_HUMAN    | TRCA     | 13 kDa  | 2  |    |    |    | 4  | 3  | 6  | 5  |
| 347 | Calcium-regulated heat-stable protein 1 OS=Homo sapiens OX-9606 GN=CAHRSP1 PE=1 SV=2                                | CHSP1_HUMAN   | CAHRSP1  | 16 kDa  | 2  | 2  |    |    | 5  |    |    | 6  |
| 348 | Integrin beta-3 OS=Homo sapiens OX-9606 GN=ITGB3 PE=1 SV=2                                                          | ITB3_HUMAN    | ITGB3    | 87 kDa  | 5  | 15 |    |    |    | 5  |    |    |
| 349 | Small VCP/p97-interacting protein OS=Homo sapiens OX-9606 GN=SVIP PE=1 SV=1                                         | SVIP_HUMAN    | SVIP     | 8 kDa   | 5  |    | 4  | 5  | 2  | 5  | 3  | 4  |
| 350 | CD2-associated protein OS=Homo sapiens OX-9606 GN=CD2AP PE=1 SV=1                                                   | CD2AP_HUMAN   | CD2AP    | 71 kDa  |    |    |    |    | 6  | 3  | 2  | 14 |
| 351 | Ras-related protein Rab-2B OS=Homo sapiens OX-9606 GN=RAB2B PE=1 SV=1                                               | RAB2B_HUMAN   | RAB2B    | 24 kDa  | 4  | 2  | 4  | 3  | 4  |    | 5  | 2  |
| 352 | Inter-alpha trypsin inhibitor heavy chain H1 OS=Homo sapiens OX-9606 GN=ITIH1 PE=1 SV=3                             | ITIH1_HUMAN   | ITIH1    | 101 kDa |    | 3  | 7  | 3  |    |    |    | 3  |
| 353 | Ubiquitin carboxyl-terminal hydrolase 3 OS=Homo sapiens OX-9606 GN=USP15 PE=1 SV=3                                  | UBP15_HUMAN   | USP15    | 112 kDa | 3  |    |    |    | 4  | 4  | 3  | 4  |
| 354 | Copper-transporting ATPase 1 OS=Homo sapiens OX-9606 GN=ATP7A PE=1 SV=4                                             | ATP7A_HUMAN   | ATP7A    | 163 kDa |    |    | 2  |    | 9  |    |    |    |
| 355 | STAM-binding protein OS=Homo sapiens OX-9606 GN=STAMPB PE=1 SV=1                                                    | STAMPB_HUMAN  | STAMPB   | 48 kDa  |    |    |    |    | 6  | 5  |    | 7  |
| 356 | T-complex protein 1 subunit gamma OS=Homo sapiens OX-9606 GN=CTC3 PE=1 SV=4                                         | CTC3_HUMAN    | CTC3     | 61 kDa  |    |    | 3  |    | 6  | 4  |    |    |
| 357 | Peflin OS=Homo sapiens OX-9606 GN=PEF1 PE=1 SV=1                                                                    | PEF1_HUMAN    | PEF1     | 30 kDa  |    |    |    | 3  | 3  |    |    |    |
| 358 | Complement receptor type 1 OS=Homo sapiens OX-9606 GN=CR1 PE=1 SV=3                                                 | CR1_HUMAN     | CR1      | 224 kDa | 8  |    |    |    | 9  |    |    | 2  |
| 359 | SH3 domain-binding protein 5-like OS=Homo sapiens OX-9606 GN=SH3BPSL PE=1 SV=1                                      | SH3PSL_HUMAN  | SH3BPSL  | 43 kDa  |    |    |    |    | 5  | 4  | 3  | 9  |
| 360 | Keratin, type 1 cuticular Ha1 OS=Homo sapiens OX-9606 GN=KRT31 PE=1 SV=3                                            | K1H1_HUMAN    | KRT31    | 47 kDa  | 25 |    |    | 4  |    | 5  |    |    |
| 361 | Glutaredoxin-3 OS=Homo sapiens OX-9606 GN=GLRX3 PE=1 SV=2                                                           | GLRX3_HUMAN   | GLRX3    | 37 kDa  | 3  | 2  |    | 2  | 3  | 3  |    | 3  |
| 362 | Guanine nucleotide-binding protein subunit beta-4 OS=Homo sapiens OX-9606 GN=GNB4 PE=1 SV=3                         | GNB4_HUMAN    | GNB4     | 38 kDa  | 4  |    | 8  |    | 5  | 14 | 8  |    |
| 363 | Proteasome subunit alpha type-1 OS=Homo sapiens OX-9606 GN=PSMA1 PE=1 SV=1                                          | PSA1_HUMAN    | PSMA1    | 30 kDa  |    |    |    | 2  | 6  |    |    | 3  |
| 364 | Heat shock protein HSP 90-beta OS=Homo sapiens OX-9606 GN=HSP90AB1 PE=1 SV=4                                        | HS90AB1_HUMAN | HSP90AB1 | 83 kDa  | 12 |    |    |    | 18 | 17 | 12 | 17 |
| 365 | 5-phase kinase-associated protein 1 OS=Homo sapiens OX-9606 GN=SKP1 PE=1 SV=4                                       | SKP1_HUMAN    | SKP1     | 19 kDa  | 2  | 3  |    | 3  |    | 2  | 4  |    |
| 366 | Latein OS=Homo sapiens OX-9606 GN=LXN PE=1 SV=2                                                                     | LXN_HUMAN     | LXN      | 26 kDa  |    |    |    |    | 4  | 3  |    | 5  |
| 367 | Proteasome subunit alpha type-3 OS=Homo sapiens OX-9606 GN=PSMA3 PE=1 SV=2                                          | PSA3_HUMAN    | PSMA3    | 28 kDa  | 2  |    |    | 3  |    | 3  |    | 4  |
| 368 | Erythroid membrane-associated protein OS=Homo sapiens OX-9606 GN=ERMAP PE=1 SV=1                                    | ERMAP_HUMAN   | ERMAP    | 53 kDa  | 4  | 2  |    |    | 3  | 2  |    | 3  |
| 369 | Transport and Golgi organization protein 2 homolog OS=Homo sapiens OX-9606 GN=TANGO2 PE=1 SV=1                      | TNGO2_HUMAN   | TANGO2   | 31 kDa  |    |    | 2  |    | 5  | 3  | 2  |    |
| 370 | Ezrin OS=Homo sapiens OX-9606 GN=EZR PE=1 SV=4                                                                      | EZR1_HUMAN    | EZR      | 69 kDa  | 13 |    | 9  |    |    | 14 | 10 |    |
| 371 | Charged multivesicular body protein 2a OS=Homo sapiens OX-9606 GN=CHMP2A PE=1 SV=1                                  | CHMP2A_HUMAN  | CHMP2A   | 25 kDa  |    |    |    | 2  | 4  |    |    | 10 |
| 372 | Gelsolin OS=Homo sapiens OX-9606 GN=GSN PE=1 SV=1                                                                   | GELS_HUMAN    | GSN      | 86 kDa  | 8  |    | 2  |    | 4  |    |    |    |
| 373 | Fructosamine-3-kinase OS=Homo sapiens OX-9606 GN=FN3K PE=1 SV=1                                                     | FN3K_HUMAN    | FN3K     | 35 kDa  | 2  | 4  |    |    | 3  |    |    | 3  |
| 374 | Serine/threonine-protein phosphatase 2A catalytic subunit alpha isoform OS=Homo sapiens OX-9606 GN=PPP2CA PE=1 SV=1 | PP2CA_HUMAN   | PPP2CA   | 36 kDa  |    |    | 2  |    | 4  | 4  | 3  | 4  |
| 375 | Immunoglobulin alpha-2 heavy chain OS=Homo sapiens OX-9606 PE=1 SV=2                                                | IGA2_HUMAN    | IGA2     | 49 kDa  | 17 |    | 16 |    | 10 | 11 |    | 8  |
| 376 | Carbonyl reductase [NADPH] 1 OS=Homo sapiens OX-9606 GN=CBR1 PE=1 SV=3                                              | CBR1_HUMAN    | CBR1     | 30 kDa  |    |    |    | 2  | 4  | 2  | 5  | 2  |
| 377 | Eukaryotic initiation factor 4A1 OS=Homo sapiens OX-9606 GN=EIF4A1 PE=1 SV=1                                        | IF4A1_HUMAN   | EIF4A1   | 46 kDa  |    |    |    |    | 6  |    |    | 3  |
| 378 | 6-phosphogluconolactonase OS=Homo sapiens OX-9606 GN=PGLS PE=1 SV=2                                                 | PGLS_HUMAN    | PGLS     | 28 kDa  | 2  |    |    | 2  | 2  | 2  |    | 2  |
| 379 | 2'-deoxynucleoside 5'-phosphate N-hydrolase 1 OS=Homo sapiens OX-9606 GN=DNPH1 PE=1 SV=1                            | DNPH1_HUMAN   | DNPH1    | 19 kDa  |    |    |    |    |    | 2  | 3  | 3  |
| 380 | Nucleosome assembly protein 1-like 1 OS=Homo sapiens OX-9606 GN=NAP1L1 PE=1 SV=1                                    | NP1L1_HUMAN   | NAP1L1   | 45 kDa  |    |    |    |    | 6  | 7  |    | 7  |
| 381 | 14-3-3 protein gamma OS=Homo sapiens OX-9606 GN=YWHAG PE=1 SV=2                                                     | I43G3_HUMAN   | YWHAG    | 28 kDa  | 6  |    | 6  |    | 8  | 6  | 7  | 9  |
| 382 | Small glutamine-rich tetrapeptide repeat-containing protein alpha OS=Homo sapiens OX-9606 GN=SGTA PE=1 SV=1         | SGTA_HUMAN    | SGTA     | 34 kDa  | 2  |    |    |    | 6  |    |    | 5  |
| 383 | CD99 antigen OS=Homo sapiens OX-9606 GN=CD99 PE=1 SV=1                                                              | CD99_HUMAN    | CD99     | 19 kDa  |    |    |    |    |    |    |    | 4  |
| 384 | Exportin-7 OS=Homo sapiens OX-9606 GN=XPO7 PE=1 SV=3                                                                | XPO7_HUMAN    | XPO7     | 124 kDa |    |    | 3  |    | 2  | 4  |    |    |
| 385 | Heparin cofactor 2 OS=Homo sapiens OX-9606 GN=SERPIND1 PE=1 SV=3                                                    | HEP2_HUMAN    | SERPIND1 | 57 kDa  |    |    |    | 4  | 2  |    |    | 2  |
| 386 | Ras-related protein Rab-6A OS=Homo sapiens OX-9606 GN=RAB6A PE=1 SV=3                                               | RAB6A_HUMAN   | RAB6A    | 24 kDa  | 5  |    | 3  |    | 7  | 6  |    | 10 |
| 387 | AP-2 complex subunit alpha 1 OS=Homo sapiens OX-9606 GN=AP2A1 PE=1 SV=3                                             | AP2A1_HUMAN   | AP2A1    | 108 kDa |    |    |    |    |    | 2  |    | 2  |
| 388 | Immunoglobulin kappa variable 4-1 OS=Homo sapiens OX-9606 GN=IGKV4-1 PE=1 SV=1                                      | IGKV4_HUMAN   | IGKV4-1  | 13 kDa  | 2  | 4  |    | 6  |    | 4  |    | 3  |
| 389 | Protein TFG OS=Homo sapiens OX-9606 GN=TFG PE=1 SV=2                                                                | TFG_HUMAN     | TFG      | 43 kDa  |    |    |    | 2  | 7  |    |    |    |
| 390 | Ras-related protein Rab-1A OS=Homo sapiens OX-9606 GN=RAB1A PE=1 SV=3                                               | RAB1A_HUMAN   | RAB1A    | 23 kDa  |    |    |    |    | 12 |    | 16 |    |
| 391 | SLIT-ROBO Rho GTPase-activating protein 2 OS=Homo sapiens OX-9606 GN=SRGAP2 PE=1 SV=3                               | SRGP2_HUMAN   | SRGAP2   | 121 kDa | 3  |    | 2  |    | 3  |    | 8  | 6  |
| 392 | Complement component C9 OS=Homo sapiens OX-9606 GN=C9 PE=1 SV=2                                                     | C9_HUMAN      | C9       | 63 kDa  | 2  | 4  | 2  |    | 2  |    |    | 5  |
| 393 | Glutathione synthetase OS=Homo sapiens OX-9606 GN=GS1 PE=1 SV=1                                                     | GS1_HUMAN     | GS1      | 52 kDa  | 2  |    |    | 2  | 3  |    |    | 2  |
| 394 | Complement C1q subcomponent subunit A OS=Homo sapiens OX-9606 GN=C1QA PE=1 SV=2                                     | C1QA_HUMAN    | C1QA     | 26 kDa  | 3  |    |    | 8  |    | 3  |    | 3  |
| 395 | Desmoplakin OS=Homo sapiens OX-9606 GN=DSP PE=1 SV=3                                                                | DSP_HUMAN     | DSP      | 332 kDa | 9  |    |    |    |    |    |    | 6  |
| 396 | Vinculin OS=Homo sapiens OX-9606 GN=VCL PE=1 SV=4                                                                   | VINC_HUMAN    | VCL      | 124 kDa | 2  | 11 |    |    |    | 2  |    |    |
| 397 | Protein ABHD14B OS=Homo sapiens OX-9606 GN=ABHD14B PE=1 SV=1                                                        | ABHD14B_HUMAN | ABHD14B  | 22 kDa  |    |    |    |    | 2  | 4  |    | 3  |
| 398 | Ran-specific GTPase-activating protein OS=Homo sapiens OX-9606 GN=RRBP1 PE=1 SV=1                                   | RANBP1_HUMAN  | RANBP1   | 23 kDa  |    | 2  |    | 2  | 3  |    |    | 3  |
| 399 | Phosphoglucomutase-2 OS=Homo sapiens OX-9606 GN=PGCM2 PE=1 SV=4                                                     | PGM2_HUMAN    | PGM2     | 23 kDa  | 2  |    |    |    |    | 4  |    |    |
| 400 | Apolipoprotein D OS=Homo sapiens OX-9606 GN=APOD PE=1 SV=1                                                          | APOD_HUMAN    | APOD     | 21 kDa  | 5  | 6  |    | 3  |    |    |    |    |
| 401 | Profilin-1 OS=Homo sapiens OX-9606 GN=PFN1 PE=1 SV=2                                                                | PROF1_HUMAN   | PFN1     | 15 kDa  | 2  | 4  |    |    | 5  | 3  | 5  | 2  |
| 402 | Rabankyrin-5 OS=Homo sapiens OX-9606 GN=ANKFY1 PE=1 SV=2                                                            | ANKFY1_HUMAN  | ANKFY1   | 128 kDa |    |    | 5  |    |    | 7  | 3  | 4  |

[illegible]

[illegible]

|     |                                                                                                              |                  |           |         |   |   |   |   |
|-----|--------------------------------------------------------------------------------------------------------------|------------------|-----------|---------|---|---|---|---|
| 605 | WD repeat-containing protein 48 OS=Homo sapiens OX=9606 GN=WDRA48 PE=1 SV=1                                  | WDRA8_HUMAN      | WDRA8     | 76 kDa  |   | 2 |   |   |
| 606 | Eukaryotic peptide chain release factor GTP-binding subunit ERF3A OS=Homo sapiens OX=9606 GN=GSPT1 PE=1 SV=1 | ERF3A_HUMAN      | GSPT1     | 56 kDa  |   |   | 2 |   |
| 607 | Mitogen-activated protein kinase 1 OS=Homo sapiens OX=9606 GN=MAPK1 PE=1 SV=3                                | MKD1_HUMAN       | MAPK1     | 41 kDa  |   |   |   | 2 |
| 608 | Serine/threonine-protein kinase 10 OS=Homo sapiens OX=9606 GN=STK10 PE=1 SV=1                                | STK10_HUMAN      | STK10     | 112 kDa |   | 3 |   | 3 |
| 609 | Charged multivesicular body protein 1a OS=Homo sapiens OX=9606 GN=CHMP1A PE=1 SV=1                           | CHM1A_HUMAN      | CHMP1A    | 22 kDa  |   |   |   | 2 |
| 610 | Thioredoxin reductase 1, cytoplasmic OS=Homo sapiens OX=9606 GN=TXNRD1 PE=1 SV=3                             | TRXR1_HUMAN      | TXNRD1    | 71 kDa  |   |   | 3 |   |
| 611 | Vacuolar protein sorting-associated protein 4B OS=Homo sapiens OX=9606 GN=VP54B PE=1 SV=2                    | VP54B_HUMAN      | VP54B     | 49 kDa  |   |   |   | 4 |
| 612 | MAGL8 p55 subfamily member 7 OS=Homo sapiens OX=9606 GN=MPP7 PE=1 SV=1                                       | MPP7_HUMAN       | MPP7      | 66 kDa  |   |   |   | 2 |
| 613 | G55 acidic ribosomal protein P2 OS=Homo sapiens OX=9606 GN=RLA2 PE=1 SV=1                                    | RLA2_HUMAN       | RPAP2     | 12 kDa  |   |   | 2 |   |
| 614 | RING finger protein 11 OS=Homo sapiens OX=9606 GN=RNFI1 PE=1 SV=1                                            | RNF11_HUMAN      | RNF11     | 17 kDa  |   |   |   | 3 |
| 615 | Activator of 90 kDa heat shock protein ATPase homolog 1 OS=Homo sapiens OX=9606 GN=AHSA1 PE=1 SV=1           | AHSA1_HUMAN      | AHSA1     | 38 kDa  |   |   |   | 3 |
| 616 | Regulator complex protein LAMTOR1 OS=Homo sapiens OX=9606 GN=LAMTOR1 PE=1 SV=2                               | LTOR1_HUMAN      | LAMTOR1   | 18 kDa  |   |   |   | 2 |
| 617 | Caspase-14 OS=Homo sapiens OX=9606 GN=CASP14 PE=1 SV=2                                                       | CASP14_HUMAN     | CASP14    | 28 kDa  | 2 |   |   |   |
| 618 | Heterogeneous nuclear ribonucleoprotein H OS=Homo sapiens OX=9606 GN=HNRNPH1 PE=1 SV=4                       | HNRH1_HUMAN      | HNRNPH1   | 49 kDa  |   |   |   |   |
| 619 | Nbsan-like protein 1 OS=Homo sapiens OX=9606 GN=FAM129B PE=1 SV=3                                            | NIBL1_HUMAN      | FAM129B   | 84 kDa  |   | 4 |   | 5 |
| 620 | Mannan-binding lectin serine protease 2 OS=Homo sapiens OX=9606 GN=MASP2 PE=1 SV=4                           | MASP2_HUMAN      | MASP2     | 76 kDa  |   |   | 2 |   |
| 621 | Eukaryotic translation initiation factor 2 subunit 3 OS=Homo sapiens OX=9606 GN=EIF253 PE=1 SV=3             | IF2G_HUMAN       | EIF253    | 51 kDa  |   |   |   | 2 |
| 622 | Serine/threonine-protein phosphatase CPPED1 OS=Homo sapiens OX=9606 GN=CPPED1 PE=1 SV=3                      | CPPED_HUMAN      | CPPED1    | 36 kDa  |   |   |   | 2 |
| 623 | Protein EFR3 homolog A OS=Homo sapiens OX=9606 GN=EFR3A PE=1 SV=2                                            | EFR3A_HUMAN      | EFR3A     | 93 kDa  |   |   | 2 |   |
| 624 | 60 kDa heat shock protein, mitochondrial OS=Homo sapiens OX=9606 GN=HSPD1 PE=1 SV=2                          | CHSD_HUMAN       | HSPD1     | 63 kDa  |   |   |   | 3 |
| 625 | Dynactin subunit 2 OS=Homo sapiens OX=9606 GN=DCTN2 PE=1 SV=4                                                | DCTN2_HUMAN      | DCTN2     | 44 kDa  |   | 3 |   | 2 |
| 626 | Plexin-A1 OS=Homo sapiens OX=9606 GN=PLXNA1 PE=1 SV=3                                                        | PLXA1_HUMAN      | PLXNA1    | 211 kDa |   |   | 3 |   |
| 627 | Coagulation factor XIII A chain OS=Homo sapiens OX=9606 GN=F13A1 PE=1 SV=4                                   | F13A1_HUMAN      | F13A1     | 83 kDa  | 2 |   |   |   |
| 628 | Mannan-binding lectin serine protease 1 OS=Homo sapiens OX=9606 GN=MASP1 PE=1 SV=3                           | MASP1_HUMAN      | MASP1     | 79 kDa  |   | 2 |   |   |
| 629 | Coronin-1A OS=Homo sapiens OX=9606 GN=COR1A PE=1 SV=4                                                        | COR1A_HUMAN      | COR1A     | 51 kDa  |   |   | 2 |   |
| 630 | Protein S100-A7 OS=Homo sapiens OX=9606 GN=S100A7 PE=1 SV=4                                                  | S10A7_HUMAN      | S100A7    | 11 kDa  |   |   |   | 2 |
| 631 | Dematin OS=Homo sapiens OX=9606 GN=DMTN PE=1 SV=3                                                            | DEMA_HUMAN       | DMTN      | 46 kDa  |   |   |   |   |
| 632 | Endoplasmic reticulum chaperone BIP OS=Homo sapiens OX=9606 GN=HSPA5 PE=1 SV=2                               | BIP_HUMAN        | HSPA5     | 72 kDa  |   |   | 2 |   |
| 633 | Flaggrin-2 OS=Homo sapiens OX=9606 GN=FLG2 PE=1 SV=1                                                         | FLA2_HUMAN       | FLG2      | 248 kDa | 4 |   |   | 6 |
| 634 | UBAP1-MVB12-associated (UMA)-domain containing protein 1 OS=Homo sapiens OX=9606 GN=UMAD1 PE=2 SV=2          | UMAD1_HUMAN      | UMAD1     | 15 kDa  |   |   |   |   |
| 635 | 5'-AMP-activated protein kinase catalytic subunit alpha-1 OS=Homo sapiens OX=9606 GN=PRKAA1 PE=1 SV=4        | AAPK1_HUMAN      | PRKAA1    | 64 kDa  |   |   | 3 | 3 |
| 636 | Thioredoxin-dependent peroxide reductase, mitochondrial OS=Homo sapiens OX=9606 GN=PRDX3 PE=1 SV=3           | PRDX3_HUMAN      | PRDX3     | 28 kDa  |   |   |   |   |
| 637 | Peroxisome-5, mitochondrial OS=Homo sapiens OX=9606 GN=PRDX5 PE=1 SV=4                                       | PRDX5_HUMAN      | PRDX5     | 22 kDa  |   |   | 4 | 4 |
| 638 | Phosphatidylinositol 4-phosphate 5-kinase type-1 alpha OS=Homo sapiens OX=9606 GN=PIPSK1A PE=1 SV=1          | PI51A_HUMAN      | PIPSK1A   | 63 kDa  |   |   |   |   |
| 639 | Fibulin-1 OS=Homo sapiens OX=9606 GN=FBLN1 PE=1 SV=4                                                         | FBLN1_HUMAN      | FBLN1     | 77 kDa  |   | 5 | 2 |   |
| 640 | Voltage-dependent anion-selective channel protein 3 OS=Homo sapiens OX=9606 GN=VDAC3 PE=1 SV=1               | VDAC3_HUMAN      | VDAC3     | 31 kDa  |   |   |   | 5 |
| 641 | Pleckstrin OS=Homo sapiens OX=9606 GN=PLEK PE=1 SV=3                                                         | PLEK_HUMAN       | PLEK      | 40 kDa  | 2 |   |   |   |
| 642 | Tumor protein D54 OS=Homo sapiens OX=9606 GN=TPD52L2 PE=1 SV=2                                               | TPD54_HUMAN      | TPD52L2   | 22 kDa  |   |   |   | 2 |
| 643 | MAP/microtubule affinity-regulating kinase 3 OS=Homo sapiens OX=9606 GN=MARK3 PE=1 SV=5                      | MARK3_HUMAN      | MARK3     | 84 kDa  |   |   | 2 |   |
| 644 | Endophilin-B2 OS=Homo sapiens OX=9606 GN=SH3GLB2 PE=1 SV=1                                                   | SH3LB2_HUMAN     | SH3GLB2   | 44 kDa  |   |   | 2 |   |
| 645 | Epidermal growth factor receptor substrate 15-like 1 OS=Homo sapiens OX=9606 GN=EPS15L1 PE=1 SV=1            | EP15R_HUMAN      | EPS15L1   | 94 kDa  |   |   |   | 3 |
| 646 | Switch-associated protein 70 OS=Homo sapiens OX=9606 GN=SWAP70 PE=1 SV=1                                     | SWP70_HUMAN      | SWAP70    | 69 kDa  |   |   |   |   |
| 647 | Protein TME8B OS=Homo sapiens OX=9606 GN=TME8B PE=1 SV=1                                                     | TME8B_HUMAN      | TME8B     | 36 kDa  |   |   | 2 |   |
| 648 | Coagulation factor XII OS=Homo sapiens OX=9606 GN=F12 PE=1 SV=3                                              | FA12_HUMAN       | F12       | 68 kDa  |   |   | 2 |   |
| 649 | Apolipoprotein F OS=Homo sapiens OX=9606 GN=APOF PE=1 SV=2                                                   | APOF_HUMAN       | APOF      | 35 kDa  |   |   |   |   |
| 650 | Cullin-2 OS=Homo sapiens OX=9606 GN=CUL2 PE=1 SV=2                                                           | CUL2_HUMAN       | CUL2      | 87 kDa  | 2 |   |   |   |
| 651 | Metalloendolase STEAP3 OS=Homo sapiens OX=9606 GN=STEAP3 PE=1 SV=2                                           | STEAP3_HUMAN     | STEAP3    | 55 kDa  |   |   |   | 2 |
| 652 | Importin subunit alpha-3 OS=Homo sapiens OX=9606 GN=KPNA4 PE=1 SV=1                                          | IMA3_HUMAN       | KPNA4     | 58 kDa  |   |   | 2 |   |
| 653 | G protein-coupled receptor kinase 6 OS=Homo sapiens OX=9606 GN=GRK6 PE=1 SV=2                                | GRK6_HUMAN       | GRK6      | 66 kDa  |   |   | 2 |   |
| 654 | Heterogeneous nuclear ribonucleoprotein A1-like 2 OS=Homo sapiens OX=9606 GN=HNRNPAL12 PE=2 SV=2             | RAL12_HUMAN (+1) | HNRNPAL12 | 34 kDa  |   |   |   | 2 |
| 655 | NIF3-like protein 1 OS=Homo sapiens OX=9606 GN=NIF3L1 PE=1 SV=2                                              | NIF3L1_HUMAN     | NIF3L1    | 42 kDa  | 2 |   |   |   |
| 656 | Palmitoyltransferase ZDHHC5 OS=Homo sapiens OX=9606 GN=ZDHHC5 PE=1 SV=2                                      | ZDHCS_HUMAN      | ZDHHC5    | 78 kDa  |   |   | 2 |   |
| 657 | Platelet glycoprotein Ib alpha chain OS=Homo sapiens OX=9606 GN=GP1BA PE=1 SV=2                              | GP1BA_HUMAN      | GP1BA     | 72 kDa  |   | 2 |   |   |
