# Supplementary material for: Proteome of Stored RBC Membrane and Vesicles from Heterozygous Beta Thalassemia Donors
Source: MDPI journal article supplement (doi:10.3390/ijms22073369), 2021-03-25
Supplement: s1 [file s1]

**Table S5:** Proteins with a trend for different expression levels in  $\beta$ Thal<sup>+</sup> EVs vs. control on day 42 of storage

| Protein                                  | $\beta$ Thal <sup>+</sup> EVs | Control EVs  | p-value |
|------------------------------------------|-------------------------------|--------------|---------|
| Carbonic anhydrase 1                     | 192.80±63.43                  | 136.60±23.39 | 0.100   |
| Complement C3                            | 43.80±17.74                   | 83.40±39.26  | 0.074   |
| Glyceraldehyde 3-phosphate dehydrogenase | 41.00±3.81                    | 33.80±7.01   | 0.078   |
| Immunoglobulin kappa constant            | 31.67±5.69                    | 39.00±3.74   | 0.092   |
| Transferrin receptor                     | 41.50±16.60                   | 8.50±4.95    | 0.059   |
| Hemopexin                                | 25.20±6.26                    | 33.20±6.91   | 0.091   |
| Porphobilinogen deaminase                | 16.00±6.28                    | 9.25±1.50    | 0.077   |
| Aspartate aminotransferase               | 10.20±2.95                    | 6.60±1.95    | 0.052   |
| Coagulation factor V                     | 4.33±2.52                     | 14.50±6.76   | 0.059   |
| CD44 antigen                             | 7.80±1.79                     | 6.00±0.71    | 0.070   |
| Ribose-phosphate pyrophosphokinase 1     | 6.40±2.07                     | 8.50±0.58    | 0.093   |
| Proteasome subunit alpha type-1          | 4.67±1.53                     | 2.33±0.58    | 0.069   |
| Proteasome subunit alpha type-2          | 7.20±2.95                     | 3.75±1.26    | 0.067   |
